# Supplementary material for: Observational and prospective study: evaluation of beliefs and representations of chronic treatments of polymedicated patients hospitalised in a vascular medicine and surgery department
Source: PubMed Central journal article supplement — BMJ Open. 2023 Dec 13;13(12):e073250. doi: 10.1136/bmjopen-2023-073250 (PMC10729245; doi:10.1136/bmjopen-2023-073250), 2023-12-13

## Supplemental Table :

**Supplemental Table 1.** Characteristics of the population (N=100) and the drugs (N=965)

| Characteristics of patients                                         | N=100                   |
|---------------------------------------------------------------------|-------------------------|
| Female sex                                                          | 31 (31.0%)              |
| Age (years)                                                         | 70.8 ± 10.7 [38.0;92.0] |
| Time since first chronic treatment (years)                          | 19.4 ± 12.4 [0.5;58.0]  |
| Level of study                                                      |                         |
| Secondary level                                                     | 45 (45.0%)              |
| Higher study                                                        | 24 (24.0%)              |
| Primary level                                                       | 24 (24.0%)              |
| Lack of study                                                       | 7 (7.0%)                |
| Socio-professional category                                         |                         |
| Workers                                                             | 31 (31.0%)              |
| Intermediate professions                                            | 18 (18.0%)              |
| Employees                                                           | 17 (17.0%)              |
| Executives, Higher intellectual professions                         | 14 (14.0%)              |
| Craftsmen, Shopkeeper, Compagny managers                            | 12 (12.0%)              |
| Farmer                                                              | 5 (5.0%)                |
| Other†                                                              | 3 (3.0%)                |
| Lifestyle                                                           |                         |
| Circled                                                             | 91 (91.0%)              |
| Alone                                                               | 9 (9.0%)                |
| Organization around medication intake                               |                         |
| Autonomous                                                          | 83 (83.0%)              |
| Help from relatives (partner, children)                             | 11 (11.0%)              |
| Assistance from a nurse                                             | 6 (6.0%)                |
| Information received at the start of treatment                      | 87 (87.0%)              |
| Source of information                                               |                         |
| From the general practitioner                                       | 73 (73.0%)              |
| From the specialist doctor                                          | 61 (61.0%)              |
| From the pharmacist                                                 | 46 (46.0%)              |
| From family and friends                                             | 5 (5.0%)                |
| Information received perceived as sufficient by the patient         | 64 (64.0%)              |
| Need for additional research (Internet, books, magazines, leaflets) | 27 (27.0%)              |

| <b>Drug Characteristics</b>                   | <b>N=965</b>     |
|-----------------------------------------------|------------------|
| Number of drugs per patient                   | 9.7 ± 3.6 [5;21] |
| ATC class of drugs                            |                  |
| Cardiovascular (C)                            | 310 (32.0%)      |
| Alimentary tract and metabolism (A)           | 190 (19.8%)      |
| Nervous System (N)                            | 175 (18.0%)      |
| Blood and blood-forming organs (B)            | 141 (14.6%)      |
| Respiratory system(R)                         | 47 (4.9%)        |
| Systemic hormones, excluding sex hormones (H) | 19 (2.0%)        |
| Other‡                                        | 83 (8.7%)        |

Results are presented as mean ± standard deviation [minimum-maximum] for quantitative variables and as counts (%) for qualitative variables

\*To the question "Since when have you been taking your first chronic treatment?", 4 patients were unable to answer.

†Other occupations: Housewife (2%), No occupation (1%)

‡Other ATC class: J-General anti-infectives for systemic use (0.8%), L-Antineoplastics and immunomodulators (1.6%), P-Antiparasitic, insecticides (0.1%), V-Miscellaneous (0.6%), D-Dermatological drugs (0.5%), M-Muscle and skeletal (1.4%), S-Sensory organs (1%), G-Genitourinary system and sex hormones (1.7%), No ATC class (1%)

**Supplemental Table 2.** Correlation between different age categories and patients' knowledge (drugs and indications cited) (N = 100)

|                                 | Age (years) | [30-59]<br>N=10 | [60-69]<br>N=28 | [70-79]<br>N=46 | [80 and more]<br>N=16 | p-value       |
|---------------------------------|-------------|-----------------|-----------------|-----------------|-----------------------|---------------|
| Percentage of drugs cited       | Median      | 83.3            | 46.4            | 40.0            | 28.6                  | <b>0.0193</b> |
|                                 | [Q1;Q3]     | [66.7;100.0]    | [29.7;74.3]     | [18.2;71.4]     | [0.0;66.4]            |               |
|                                 | [Min-Max]   | [20.0 ;100.0]   | [0.0;100.0]     | [0.0;100.0]     | [0.0;100.0]           |               |
| Percentage of known indications | Median      | 100.0           | 75              | 80.9            | 84.5                  | 0.0761        |
|                                 | [Q1;Q3]     | [82.4;100.0]    | [55.2;90.5]     | [54.5;100.0]    | [39.4;100.0]          |               |
|                                 | [Min-Max]   | [60.0;100.0]    | [23.1;100.0]    | [0.0;100.0]     | [0.0;100.0]           |               |

Q1 : First Quartile ; Q3 : Third quartile ; Min : minimum ; Max : maximum

## Supplemental Files 1 : Global questionnaire

Patient n°: .....

Length of the interview: .....

### **Socio-demographic information :**

Gender:            Age:                            Lifestyle:    Married    Single    Children

Origins:

Level of study:

Socio-professional category:    Farmer                     Craftsmen, Shopkeeper, Compagny managers

Executives, Higher intellectual professions                     Professions intermédiaires

Employees             Workers                    Other:.....

### **Chronic treatment :**

Number of medications on the prescription:

How long have you been taking your first chronic treatment?

### **Informations :**

- Have you ever had your treatments explained to you?    Yes     No
- Do you feel you have received enough information about your treatments?    Yes     No
- From whom did you get information about your treatments?
  - Specialist
  - General practitioner
  - Pharmacist
  - Family

### **Treatment management :**

- Who manages your treatments?
  - Myself
  - A nurse
  - A family member



## Supplemental Files 2 : Belief Medical Questionnaire

**Patient n°:**

Score:

1: Totally disagree, 2: Disagree, 3: Uncertain, 4: Agree, 5: Totally agree

**Specific Beliefs :**

1. My health, at present, depends on my medicines:
2. Having to take medicines worries me:
3. My life would be impossible without my medicines:
4. Without my medicines I would be very ill:
5. I sometimes worry about long-term effects of my medicines:
6. My medicines are a mystery to me:
7. My health in the future will depend on my medicines:
8. My medicines disrupt my life:
9. I sometimes worry about becoming too dependent on my medicines:
10. My medicines protect me from becoming worse:

**General Beliefs :**

11. Doctors use too many medicines:
12. People who take medicines should stop their treatment for a while every now and again:
13. Most medicines are addictive:
14. Natural remedies are safer than medicines:
15. Medicines do more harm than good:
16. All medicines are poisonous:
17. Doctors place too much trust in medicines:
18. If doctors had more time with patients, they would prescribe fewer medicines:

**Supplemental Files 3 : GIRERD questionnaire****Assessment of medication compliance****Patient n° :**

|                                                                                                                           | YES | NO |
|---------------------------------------------------------------------------------------------------------------------------|-----|----|
| Did you forget to take your medication this morning?                                                                      |     |    |
| Since your last visit, have you run out of medication?                                                                    |     |    |
| Have you ever been late taking your medication?                                                                           |     |    |
| Have you ever not taken your medication because your memory fails you some days?                                          |     |    |
| Have you ever not taken your medication, because some days you feel that your treatment is doing you more harm than good? |     |    |
| Do you think you have too many pills to take?                                                                             |     |    |

## Supplemental Files 4 : The local ethics committee

**AVIS 22-06-2201**  
**Groupe Nantais d'Éthique dans le Domaine de la Santé (GNEDS)**

|                                        |                                                                                                        |
|----------------------------------------|--------------------------------------------------------------------------------------------------------|
| Nom du protocole<br>Code et versioning | <b>Croyances et représentations chez les patients polymédiqués en chirurgie et médecine vasculaire</b> |
|----------------------------------------|--------------------------------------------------------------------------------------------------------|

|                                        |                                                                                                          |
|----------------------------------------|----------------------------------------------------------------------------------------------------------|
| Investigateur principal                | Dr JF HUON                                                                                               |
| Lieu de l'étude                        | CHU NANTES                                                                                               |
| Type de l'étude                        | Monocentrique, prospective, exploratoire, observationnelle                                               |
| Type patients/participants             | Patients polymédiqués hospitalisés en chirurgie et médecine vasculaire                                   |
| Nombre de patients/participants prévus | 100                                                                                                      |
| Objectif principal                     | Évaluation de la croyance des patients sur leurs traitements habituels                                   |
| Objectif secondaire                    | Connaissance et importance données par le patient à chacun de ses traitements<br>Adhésion médicamenteuse |

### Documents communiqués

|                                                |     |
|------------------------------------------------|-----|
| Justification de l'étude                       | OUI |
| Méthodologie                                   | OUI |
| Lettre d'information et lettre de consentement | OUI |

### Remarque générale

Le GNEDS formule d'abord la remarque qu'il n'a pas pour mission de donner un avis sur les aspects scientifiques du protocole, en particulier sur l'adéquation de la méthodologie aux objectifs poursuivis par l'étude. Il ne tient compte des données d'ordre scientifique et méthodologique que dans la mesure où elles ont des implications d'ordre éthique. Dans le cas présent, il se bornera à constater que les objectifs de cette étude et sa méthodologie sont conformes aux principes de l'éthique.

### Confidentialité

|                 |      |
|-----------------|------|
| Confidentialité | OUI  |
| Anonymat        | OUI  |
| CNIL            | RGPD |

Commentaires :



**Information et consentement***Consentement :*

|                              |      |
|------------------------------|------|
| Recueil nécessaire           | OUI  |
| Type consentement préférable | ORAL |
| Traçabilité dans le dossier  | NA   |

Commentaires :

*Lettre information précisant :*

|                                              |     |
|----------------------------------------------|-----|
| Titre de l'étude                             | OUI |
| But de l'étude                               | OUI |
| Déroulement de l'étude                       | OUI |
| Prise en charge courante inchangée           | OUI |
| Possibilité de recevoir résultats de l'étude | OUI |
| Traçabilité dans le dossier                  | NA  |

Commentaires :

**Conclusion**

|                                        |     |
|----------------------------------------|-----|
| Avis favorable                         | OUI |
| Révision nécessaire selon commentaires |     |
| Avis défavorable                       |     |

**GNEDS : Professeur Paul BARRIERE**

Nantes le 22 juin 2022



Supplement: bmjopen-2023-073250supp001.pdf [file bmjopen-2023-073250supp001.pdf]
