# Supplementary material for: Observational and prospective study: evaluation of beliefs and representations of chronic treatments of polymedicated patients hospitalised in a vascular medicine and surgery department
Source: PubMed Central journal article supplement — BMJ Open. 2023 Dec 13;13(12):e073250. doi: 10.1136/bmjopen-2023-073250 (PMC10729245; doi:10.1136/bmjopen-2023-073250), 2023-12-13
Supplement: bmjopen-2023-073250.draft_revisions.pdf [file bmjopen-2023-073250.draft_revisions.pdf]

# BMJ Open

BMJ Open is committed to open peer review. As part of this commitment we make the peer review history of every article we publish publicly available.

When an article is published we post the peer reviewers' comments and the authors' responses online. We also post the versions of the paper that were used during peer review. These are the versions that the peer review comments apply to.

The versions of the paper that follow are the versions that were submitted during the peer review process. They are not the versions of record or the final published versions. They should not be cited or distributed as the published version of this manuscript.

BMJ Open is an open access journal and the full, final, typeset and author-corrected version of record of the manuscript is available on our site with no access controls, subscription charges or pay-per-view fees (<http://bmjopen.bmj.com>).

If you have any questions on BMJ Open's open peer review process please email [info.bmjopen@bmj.com](mailto:info.bmjopen@bmj.com)

# BMJ Open

## Evaluation of beliefs and representations of chronic treatments of patients hospitalized in medicine and vascular surgery

|                               |                                                                                                                                                                                                                                                                                                                                                                                                              |
|-------------------------------|--------------------------------------------------------------------------------------------------------------------------------------------------------------------------------------------------------------------------------------------------------------------------------------------------------------------------------------------------------------------------------------------------------------|
| Journal:                      | <i>BMJ Open</i>                                                                                                                                                                                                                                                                                                                                                                                              |
| Manuscript ID                 | bmjopen-2023-073250                                                                                                                                                                                                                                                                                                                                                                                          |
| Article Type:                 | Original research                                                                                                                                                                                                                                                                                                                                                                                            |
| Date Submitted by the Author: | 21-Mar-2023                                                                                                                                                                                                                                                                                                                                                                                                  |
| Complete List of Authors:     | Kotry, Dounia; University Hospital Centre Nantes, Saillard, Justine; CHU Nantes, Pharmacy<br>Bonsergent, Marion; CHU Nantes, Pharmacy<br>Benichou, Antoine; CHU Nantes, Internal Medicine<br>Prot-Labarthe, Sonia; Nantes Université, Pharmacie; ECEVE<br>HUON, Jean-François; University Hospital Centre Nantes, Clinical Pharmacy; University of Nantes, Faculty of Pharmacy, Clinical Pharmacy department |
| Keywords:                     | Patient-Centered Care, CLINICAL PHARMACOLOGY, Patient Reported Outcome Measures                                                                                                                                                                                                                                                                                                                              |
|                               |                                                                                                                                                                                                                                                                                                                                                                                                              |

SCHOLARONE™  
Manuscripts

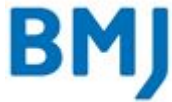

I, the Submitting Author has the right to grant and does grant on behalf of all authors of the Work (as defined in the below author licence), an exclusive licence and/or a non-exclusive licence for contributions from authors who are: i) UK Crown employees; ii) where BMJ has agreed a CC-BY licence shall apply, and/or iii) in accordance with the terms applicable for US Federal Government officers or employees acting as part of their official duties; on a worldwide, perpetual, irrevocable, royalty-free basis to BMJ Publishing Group Ltd ("BMJ") its licensees and where the relevant Journal is co-owned by BMJ to the co-owners of the Journal, to publish the Work in this journal and any other BMJ products and to exploit all rights, as set out in our [licence](#).

The Submitting Author accepts and understands that any supply made under these terms is made by BMJ to the Submitting Author unless you are acting as an employee on behalf of your employer or a postgraduate student of an affiliated institution which is paying any applicable article publishing charge ("APC") for Open Access articles. Where the Submitting Author wishes to make the Work available on an Open Access basis (and intends to pay the relevant APC), the terms of reuse of such Open Access shall be governed by a Creative Commons licence – details of these licences and which [Creative Commons](#) licence will apply to this Work are set out in our licence referred to above.

Other than as permitted in any relevant BMJ Author's Self Archiving Policies, I confirm this Work has not been accepted for publication elsewhere, is not being considered for publication elsewhere and does not duplicate material already published. I confirm all authors consent to publication of this Work and authorise the granting of this licence.

1  
2  
3  
4 1 **Evaluation of beliefs and representations of chronic treatments of**  
5  
6  
7 2 **patients hospitalized in medicine and vascular surgery**  
8  
9

10 3  
11 4 Dounia KOTRY<sup>1</sup>, Justine SAILLARD<sup>1</sup>, Marion BONSERGENT<sup>1</sup>, Antoine BENICHO<sup>2</sup>,  
12  
13 5 Sonia PROT-LABARTHE<sup>3</sup>, Jean-François HUON<sup>4</sup>  
14  
15

16 6  
17  
18 7 **University degree:**  
19  
20 8

21 9 Dounia KOTRY, PharmD  
22

23  
24 10 Justine SAILLARD, PharmD  
25

26 11 Marion BONSERGENT, PharmD  
27

28  
29 12 Antoine BENICHO, MD  
30

31 13 Sonia PROT-LABARTHE, PharmD, PhD  
32

33  
34 14 Jean-François HUON, PharmD, PhD  
35  
36  
37 15

38  
39 16 **Affiliations:**  
40

41 17 1. Nantes Université, CHU Nantes, Pharmacie, F-44000, France  
42

43  
44 18 2. Nantes Université, CHU Nantes, Médecine interne, F-44000, France  
45

46 19 3. Nantes Université, CHU Nantes, Pharmacie, F-44000, France, Université Paris Cité,  
47

48  
49 20 INSERM, ECEVE, F-75010 Paris, France  
50

51 21 4. Nantes Université, Univ Tours, CHU Nantes, CHU Tours, Pharmacie, INSERM, Methods  
52

53  
54 22 in Patients-centered outcomes and HEalth Research, SPHERE, F-44000 Nantes, France  
55  
56  
57 23

58 24 **Corresponding author:**  
59

60 25 Dounia KOTRY, dounia.kotry@gmail.fr

1  
2  
3  
4 26 **Mails:**

5  
6 27 Justine SAILLARD: justine.saillard@chu-nantes.fr

7  
8 28 Marion BONSERGENT: marion.bonsergent@chu-nantes.fr

9  
10  
11 29 Antoine BENICHOU : antoine.benichou@chu-nantes.fr

12  
13 30 Sonia PROT-LABARTHE : sonia.protlabarthe@chu-nantes.fr

14  
15  
16 31 Jean-François HUON: jeanfrancois.huon@chu-nantes.fr

17  
18  
19 32

20  
21  
22 33

23  
24  
25  
26  
27 34

28  
29  
30 35 **Abstract**

31  
32  
33  
34 36 **Context:** Today, the involvement of patients in their care is essential. As the population ages

35  
36  
37 37 and life expectancy increases, the number of patients with chronic diseases is increasing. In the

38  
39  
40 38 medical and vascular surgery departments, patients are polymedicated and mostly suffer from

41  
42  
43 39 several chronic diseases. Approximately 50% of patients with a chronic disease are not

44  
45  
46 40 adherent. Among the factors that can influence therapeutic adherence are the beliefs and

47  
48  
49 41 representations of patients.

1  
2  
3  
4 42 **Objectives:** To evaluate the beliefs and representations of chronic treatments in patients with  
5  
6  
7 43 multiple medications and hospitalized in a vascular medicine and surgery department, and to  
8  
9  
10 44 evaluate the compliance, the knowledge, and the importance patients attach to their treatments.  
11  
12

13 45 **Design:** This was an observational, prospective and a single-center study.  
14  
15

16 46 **Setting:** The study was conducted in a French tertiary hospital center of around 3000 beds in 9  
17  
18  
19  
20 47 institutions.  
21  
22

23 48 **Participants:** Hundred patients were included. Patients included had to be over 18 years of age,  
24  
25  
26  
27 49 hospitalized in the surgical and vascular medicine department and polymedicated.  
28  
29

30 50 **Methods:** Patient interviews were carried out in the department and were based on three hetero-  
31  
32  
33  
34 51 questionnaires (a global questionnaire, the BMQ and the GIRERD).  
35  
36

37 52 **Results:** Our study showed that patients perceived their treatments as beneficial rather than  
38  
39  
40 53 worrying. A correlation between compliance and beliefs was observed. "Non-compliant"  
41  
42  
43  
44 54 patients had a more negative overall view of medication than "compliant" patients. The level of  
45  
46  
47 55 compliance and knowledge of our patients was low. Only 11% of the patients were "good  
48  
49  
50 56 observers", 16% of the patients could perfectly name their treatment and 36% knew all the  
51  
52  
53  
54 57 indications.  
55

56  
57 58 **Conclusion:** Knowledge of treatment representation and beliefs are central to understanding  
58  
59  
60 59 patient behaviour. Considering patients' representations will allow the identification of levers,

1  
2  
3  
4 60 and the development of actions and educational tools adapted to improve their adherence, their  
5  
6  
7 61 knowledge and therefore their drug management.  
8  
9

10 62 Data availability statement: Data are available upon reasonable request  
11  
12  
13  
14 63

## 17 64 **Strengths and limitations of this study**

- 21 65 • This study aimed to explore the representation and beliefs of chronic treatments in  
22  
23  
24 66 patients with multiple medications and cardiac pathologies in a vascular medicine and  
25  
26  
27  
28 67 surgery department, which, to our knowledge, has not been previously investigated.
- 31 68 • One hundred patients were included in the study, providing a comprehensive sample of  
32  
33  
34  
35 69 the patient population.
- 38 70 • However, it is important to note that this is a single-center study, which may limit the  
39  
40  
41 71 generalizability of the findings to other settings. Future research in other centers is  
42  
43  
44  
45 72 needed to ensure the transferability of results.
- 48 73 • Moreover, the evaluation of knowledge in this study may have been impacted by the  
49  
50  
51 74 hospitalization of the patients. The environment of the hospital and the stress of being  
52  
53  
54  
55 75 hospitalized may have affected patients' true understanding of their treatment.  
56  
57  
58  
59 76

## 77 **Introduction**

78 According to the World Health Organization (WHO), a chronic disease is a long-term condition  
79 that usually progresses slowly and requires long-term treatment and care. It is also characterized  
80 by its impact on the quality of life of patients. Twenty million French people are affected by a  
81 chronic disease (1). They represent 77% of all diseases, the most important of which are  
82 cardiovascular, cerebral, respiratory, metabolic and cancerous diseases (2). Today, the  
83 prevalence of chronic diseases is rising sharply and can be explained by the aging of the  
84 population and the increase in life expectancy. They are therefore among the most common  
85 health care problems, with a major impact on public health and the economy (3).

86 In vascular medicine and surgery, the majority of patients have one or more chronic diseases  
87 and are polymedicated (4). Polymedication is defined as "the administration of many drugs  
88 simultaneously or the administration of an excessive number of drugs" (5,6). Furthermore, all  
89 chronic diseases require long-term management with an investment by both healthcare  
90 professionals and the patient. For this, a good level of information on the disease and treatments  
91 is necessary for the patient to avoid the risks of poor compliance. According to the WHO, 50%  
92 of patients do not adhere to their chronic treatment, even though this adherence is essential for  
93 the control of the chronic disease. Indeed, loss of adherence to treatment leads to a decrease in



1  
2  
3 94 therapeutic efficacy and exposes the patient to complications of their disease and to therapeutic  
4  
5  
6  
7 95 failure (7).  
8  
9

10 96 Among the factors that influence therapeutic adherence, can be found the representations of  
11  
12  
13 97 treatments (8). This refers to each individual's knowledge, explanations and ideas about his  
14  
15  
16  
17 98 disease. Representations are linked to the patient's behaviour, cultural, social and family  
18  
19  
20 99 background, education, professional activity, etc. (9). They have multiple origins and varies  
21  
22  
23  
24 100 from one individual to another. Today, the representation of the disease, but also of treatments,  
25  
26  
27 101 is central to understanding the behaviour of patients in their health care journey.  
28  
29  
30 102 Representations and beliefs have been studied in certain chronic diseases, notably HIV,  
31  
32  
33 103 diabetes, hypertension, asthma, etc. (9-12).  
34  
35  
36

37 104 However, to our knowledge, they have not been studied in the medical and vascular surgery  
38  
39  
40 105 fields, when it comes to hospitalized patients with multiple medications.  
41  
42  
43

44 106 The main objective of this study was to evaluate the beliefs and representations of chronic  
45  
46  
47 107 treatments in multi-medicated patients hospitalized in surgery and vascular medicine. Secondly,  
48  
49  
50 108 the patients' knowledge of their treatments, the importance given by the patient to each of their  
51  
52  
53  
54 109 treatment and the medication compliance were assessed.  
55  
56  
57

## 58 110 **Material and methods**

59  
60

1  
2  
3  
4 111 This was an observational, prospective, single-center study conducted in a French tertiary  
5  
6  
7 112 hospital center of around 3000 beds in 9 institutions.

8  
9  
10 113 Patients included had to be over 18 years of age and hospitalized in the surgical and vascular  
11  
12  
13 114 medicine department, which comprises 28 beds. Drawing on literature data (5) and the  
14  
15  
16  
17 115 experience of our medication reconciliation activity, the threshold of five medications as a  
18  
19  
20 116 reference to designate polymedicated patients was established.

21  
22  
23 117 Patients who were unable to participate in an interview because of cognitive impairment or  
24  
25  
26  
27 118 language barrier were not included. All patients underwent a medication review on admission  
28  
29  
30 119 to the vascular medicine and surgery department to obtain a complete record of their usual  
31  
32  
33  
34 120 treatment. The patient inclusion period was from early March 2022 to late June 2022. All  
35  
36  
37 121 participants provided consent.

38  
39  
40 122 The study was based on three hetero-questionnaires completed during the patient's  
41  
42  
43  
44 123 hospitalization.

45  
46  
47 124 1/ a global questionnaire regarding the patient's sociodemographic data, their usual treatments  
48  
49  
50 125 identified by the conciliation and their medication management, the information received about  
51  
52  
53  
54 126 his treatments, the knowledge he had of his treatments (name and indication) as well as the  
55  
56  
57 127 importance he gave to each medication (scored from 1 to 10).

1  
2  
3  
4 128 2/ the BMQ (Belief Medical Questionnaire). It allows for the evaluation of different specific  
5  
6  
7 129 dimensions of patients' beliefs about their medical treatments. It consists of 18 items divided  
8  
9  
10 130 into two parts: specific beliefs (patients' representations of their medical prescriptions - 10  
11  
12  
13 131 items) and general beliefs (beliefs in medicine in general - 8 items). A 5-point Likert scale was  
14  
15  
16  
17 132 used for the responses. For each question, a total score was calculated by adding the item scores.  
18  
19  
20 133 Each specific belief could get a score between 5 and 25, and each general belief a score between  
21  
22  
23 134 4 and 20. The higher the scores, the more important the beliefs are. For specific beliefs, a  
24  
25  
26  
27 135 differential score is calculated by subtracting the specific concern from the specific need. A  
28  
29  
30 136 score greater than 0 means that the perceived need for treatment is greater than the concerns.  
31  
32  
33  
34 137 The validated French version of this questionnaire was used (10).  
35  
36  
37 138 3/ the validated GIRERD medication adherence questionnaire, composed of 6 items (13).  
38  
39  
40 139 The interviews were conducted by the first author.  
41  
42  
43  
44 140 A descriptive analysis was performed on the variables of the whole population by calculating  
45  
46  
47 141 mean, standard deviation, minimum, maximum, median and quartiles according to whether the  
48  
49  
50  
51 142 variables were normal or not. Categorical variables were described by the numbers and  
52  
53  
54 143 percentages of each modality. For the analysis of correlations between two categorical  
55  
56  
57 144 variables, a Chi-2 test was performed. To test the association between a qualitative variable and  
58  
59  
60 145 a quantitative variable, a Student's t test, ANOVA, Wilcoxon test, or Kruskal-Wallis test were

1  
2  
3  
4 146 used, depending on the number of modalities of the qualitative variable and the normality of  
5  
6  
7 147 the quantitative variable. All analyses were performed using SAS® version 9.4 software.  
8  
9

10 148 This study was approved by the local ethics committee (Groupe Nantais d’Ethique dans le  
11  
12  
13 149 Domaine de la Santé) on June 22th 2022 (GNEDS 20220622).  
14  
15  
16

17 150

## 151 **Results**

### 152 **Characteristics of the patients and their treatments**

153 Over the period, three hundred sixty five patients underwent a medication reconciliation. Of the  
154 patients eligible and available at the time of service, one hundred patients were included in the  
155 study. All patients completed the study and were analyzed. The characteristics of the patients  
156 and their treatments are presented in *Table 1*. Patients reported being treated for an estimated  
157 period of 19.4(± 12.4) years. On average, 9.4 (± 3.6) drugs were prescribed simultaneously,  
158 mostly for cardiovascular (32%), digestive (19.8%) or neurological (18%) diseases. The  
159 majority of patients were informed about their treatments by a doctor, but more than a quarter  
160 (27%) felt the need for more information.

161 Women felt that they received less information about drugs from healthcare professionals than  
162 men (48.4% vs. 71.0%, p = 0.0292).

1  
2  
3 1634  
5 164 **Beliefs**

6  
7  
8 165 The results of the BMQ questionnaire for the population are presented in *Figure 1* and the BMQ  
9  
10  
11 166 score values are detailed in *Table 2*. Overall, patients said that their medication helped them not  
12  
13  
14  
15 167 to feel worse, that without it they would be sicker or that their life would be impossible. They  
16  
17  
18 168 were aware that their future life depended on taking them. However, almost one in three patients  
19  
20  
21 169 felt that doctors were too trusting of medication, and that they would prescribe less if they had  
22  
23  
24  
25 170 more time. They wondered about poor tolerance and possible addiction to certain medications.  
26  
27  
28 171 The BMQ scores clearly show that the balance of benefits and risks perceived by the patients  
29  
30  
31 172 is clearly in favor of taking the treatments for 96% of them.

32  
33  
34  
35 173

36  
37  
38 174 The more medications patients took, the more they believed in the importance of their treatment  
39  
40  
41 175 ( $r= 0.27$ ,  $p= 0.0064$ ). Women believed more in the harm of treatments ( $p= 0.0352$ ) and in the  
42  
43  
44 176 overuse of drugs than men ( $p= 0.0170$ )

45  
46  
47  
48 177 **Compliance**

49  
50  
51 178 The responses to the GIRERD questionnaire are presented in *Table 3*. Only 11% of patients had  
52  
53  
54 179 good compliance with their treatments according to the questionnaire score. One in 10 was  
55  
56  
57  
58 180 considered totally non-compliant.

1  
2  
3  
4 181 The more compliant patients were, the more they believed in the importance of their medication  
5  
6  
7 182 (p = 0.0039).  
8  
9

10 183 No significant correlation was found between the level of compliance and age (p = 0.50), level  
11  
12  
13 184 of education (p = 0.52) or number of medications (p = 0.0733).  
14  
15  
16

17 185  
18  
19 186 **Knowledge**  
20

21  
22  
23 187 On average, patients were able to name 49.3% of their treatments. Sixteen percent of patients  
24  
25  
26 188 could name all of their treatments, while 11% of patients could not name any of their treatments.  
27  
28

29 189 On average, patients knew 73.1% of the indications for all their usual treatments. When 32  
30  
31  
32 190 patients were able to name all the indications of their medication, 3 patients could not name  
33  
34  
35  
36 191 any.  
37  
38

39 192 Several correlations were found, notably between age and patient knowledge (*Supplemental*  
40  
41  
42 193 *Table*), but also with educational level. Indeed, patients with higher education knew more about  
43  
44  
45  
46 194 the indications of their treatments (mean= 85.1±22.8) than patients with no education (mean=  
47  
48  
49 195 40.9±29.4) (p = 0.0017).  
50  
51  
52

53 196 The least cited drug classes were anti-histamines for systemic use (28.6%), analgesics (26.8%),  
54  
55  
56 197 anti-anemic preparations (24.0%) and ophthalmic drugs (20%).  
57  
58  
59  
60

1  
2  
3  
4 198 Among the most prescribed drug classes, the most cited were anti-thrombotics (64.7%), beta-  
5  
6  
7 199 blockers (55.9%), drugs acting on the renin angiotensin system (49.3%) and anti-diabetics  
8  
9  
10 200 (46.8%).

11  
12  
13 201 The drug classes with the highest rate of incorrect indications were cardiology drugs (60%),  
14  
15  
16 202 anti-anemic preparations (48%), diuretics (47.5%), beta-blockers (45.8%) and lipid-lowering  
17  
18  
19 203 drugs (45%).

20  
21  
22  
23 204 When patients were asked about their treatments, a large proportion did not spontaneously  
24  
25  
26 205 mention the drugs they took "if needed", in particular analgesics such as paracetamol or  
27  
28  
29 206 symptomatic drugs such as antihistamines.

30  
31  
32  
33 207 A comparison between beliefs, compliance and knowledge was made. The results obtained are  
34  
35  
36 208 detailed in *Table 4*. For patients with low compliance, the more they knew the indications of  
37  
38  
39 209 their treatments, the less they feared their harmfulness. And the more they knew how to name  
40  
41  
42 210 treatments, the less they feared overuse.

43  
44  
45  
46  
47 211  
48  
49  
50 212 **Importance ratings**  
51  
52  
53 213 Fourteen patients were unable to rate the importance of their treatment because they felt that all  
54  
55  
56 214 their medications were equally important.  
57  
58  
59  
60

1  
2  
3  
4 215 Out of the most prescribed drug classes, two had a median importance score of less than 6:  
5  
6  
7 216 nasal preparations (3 prescriptions, median score 5.0) and constipation medications (13  
8  
9  
10 217 prescriptions, median score 5.5). Those with the highest importance scores were antidiabetics  
11  
12  
13 218 (62 prescriptions, median score 9.5), immunosuppressants (10 prescriptions, median score 10),  
14  
15  
16  
17 219 and antithrombotics (116 prescriptions, median score 9).  
18  
19  
20 220 Symptomatic medications scored high in importance. Analgesics (82 prescriptions),  
21  
22  
23 221 antihistamines (14 prescriptions), and medications for acid-related disorders (52 prescriptions)  
24  
25  
26  
27 222 all received a median score of 8.  
28  
29  
30 223 There was no significant correlation between median patient ratings and compliance ( $r = -0.13$ ,  
31  
32  
33 224  $p = 0.3623$ ).  
34  
35  
36  
37 225  
38  
39  
40  
41

## 42 226 **Discussion**

43  
44  
45  
46  
47

48 227 Our study showed that patients perceived their treatments as beneficial rather than worrying. A  
49  
50  
51 228 correlation between compliance and beliefs was observed. "Non-compliant" patients had a more  
52  
53  
54 229 negative overall view of medication than "compliant" patients. The level of compliance and  
55  
56  
57  
58  
59  
60



1  
2  
3  
4 230 knowledge of our patients was low. Only 11% of the patients were "good observers", 16% of  
5  
6  
7 231 the patients could perfectly name their treatment and 36% knew all the indications.  
8  
9

10 232  
11  
12  
13 233 In recent years, several studies assessed treatment representations and their influence on  
14  
15  
16 234 medication adherence. However, to our knowledge, this study is the first to assess patients'  
17  
18  
19 235 beliefs about their chronic treatment in relation to their knowledge and adherence in a vascular  
20  
21  
22 236 medicine and surgery department.  
23  
24  
25

26  
27 237 Our results regarding the importance attributed by patients to their chronic medication are  
28  
29  
30 238 consistent with the data found in the literature. French studies have evaluated the representation  
31  
32  
33 239 of treatments in chronic pathologies, particularly in asthma (12), diabetes and HIV (10), and  
34  
35  
36 240 bronchopulmonary cancer (14). All these studies have highlighted the importance that patients  
37  
38  
39 241 attach to their medication. Thus, patients perceive their treatment as beneficial rather than  
40  
41  
42 242 worrisome. Indeed, in our study, 77% of patients were not worried about taking medication and  
43  
44  
45 243 76% were not disturbed by medication in their daily lives.  
46  
47  
48  
49

50 244  
51  
52  
53 245 Several studies have shown a correlation between patients' representations of their treatment  
54  
55  
56 246 and the level of compliance. Horne *et al.* demonstrated this link for each of the chronic  
57  
58  
59 247 pathologies studied via the BMQ questionnaire in 324 patients. These were also patients with  
60

1  
2  
3  
4 248 various chronic diseases (asthma, oncology, cardiac and renal diseases). Indeed, the "need"  
5  
6  
7 249 score was correlated with good compliance and the "concern" score was related to poor  
8  
9  
10 250 compliance in each of the diseases studied (11). Our results could not show a significant  
11  
12  
13 251 correlation but a trend towards the same result. Conducting disease specific analyses on a larger  
14  
15  
16  
17 252 group in our setting could confirm this trend.

18  
19  
20 253 A French study also investigated the correlations between beliefs and compliance in patients  
21  
22  
23 254 with chronic diseases in general practices (15). Of the 265 patients included in the study, 40.8%  
24  
25  
26  
27 255 had good compliance, 53.2% were "moderately compliant" and 6% were "non-compliant". In  
28  
29  
30 256 our study, only 11% of patients were "good compliant". This can be explained by a significant  
31  
32  
33 257 difference in the average number of medications taken by patients. In their study, patients had  
34  
35  
36  
37 258 an average of  $3.6 \pm 2.6$  medications, almost three times less than in our study. One of the 6  
38  
39  
40 259 questions of the GIRERD questionnaire related to the amount of medication to be taken: "Do  
41  
42  
43 260 you think you have too many pills to take" and 67% of our patients answered "yes". This may  
44  
45  
46  
47 261 explain the low rate of "good compliance".

48  
49  
50 262 Deat *et al.* highlighted a significant relation correlation between the degree of compliance and  
51  
52  
53 263 the BMQ scores "concerns", "harmfulness" and "overuse", supporting the trend shown in our  
54  
55  
56  
57 264 study. The absence of a statistical significance could be explained by an important difference  
58  
59  
60 265 in the number of patients in each compliant group. Only ten patients were "non-adherent".

1  
2  
3  
4 266 Regarding the concerns of "non-adherent" patients, our results are consistent with their study:  
5  
6  
7 267 patients were more concerned with their treatment, which may have an impact on compliance.  
8  
9  
10 268 Fall *et al.* conducted a study in diabetic and HIV patients (10). A disease-specific analysis  
11  
12  
13 269 showed significant correlations between adherence and the necessity and worry scales. Thus,  
14  
15  
16  
17 270 negative beliefs were predictive of poor adherence. Non-adherent patients would therefore have  
18  
19  
20 271 a more negative overall view of medication than adherent patients.  
21  
22  
23  
24 272 According to the study by Huon *et al.* (16), the average number of medications taken by the  
25  
26  
27 273 elderly is 8 in the 70–80-year-olds, 9.61 in the 80–90-year-olds, 9.92 in the 90–100-year-olds  
28  
29  
30 274 and 8.11 for the over 100-year-olds. Overall, the increase in medication use varies as the  
31  
32  
33  
34 275 population ages. Our patients, with an average age of 70.8 years, took an average of 9.7  
35  
36  
37 276 medications. Unfortunately, the higher the number of medications, the higher the risk of  
38  
39  
40 277 forgetting or not taking the treatments (17). This high number of medications also has a role in  
41  
42  
43  
44 278 patients' knowledge and beliefs. Our results showed that the more medications patients took,  
45  
46  
47 279 the less they knew about their names and indications. These results confirm those found in the  
48  
49  
50 280 literature (18).  
51  
52  
53  
54 281 One study showed that knowledge of drug indications varied according to ATC class. Indeed,  
55  
56  
57 282 the drug classes for which the indication was not known were cardiovascular drugs (12%),  
58  
59  
60 283 asthma drugs (5%) and estrogen therapies (5%) (19). In our study, we also noted that the

1  
2  
3  
4 284 indications for cardiovascular drugs were the least known. Indeed, patients hospitalized in the  
5  
6  
7 285 vascular medicine department have many cardiology medications. It is therefore essential that  
8  
9  
10 286 caregivers take sufficient time with patients to educate and involve them in their care. Persall  
11  
12  
13 287 *et al.* (19) also showed that the older and less educated the patients were, the less they knew  
14  
15  
16  
17 288 about their treatments. Our results are consistent with this study.  
18  
19  
20 289 Only 16% of patients could perfectly name their treatment and 36% knew all the indications.  
21  
22  
23 290 In general, the level of knowledge of patients about their treatment was low. However, it is  
24  
25  
26  
27 291 difficult to compare our results with those found in the literature, because of the disparity  
28  
29  
30 292 between the number of drugs taken per patient and the number of patients included. Indeed,  
31  
32  
33 293 Akici *et al.* (20) showed, in a study including 1618 patients with an average number of drugs  
34  
35  
36  
37 294 of 3.3 per patient, that only 10.9% of patients could correctly name their treatment. Given the  
38  
39  
40 295 average number of medications taken by the patients in our study, more than 9, it seems normal  
41  
42  
43  
44 296 that this number is low in our results. The study by Haidar-Ahmad *et al.* including 351 patients,  
45  
46  
47 297 with a mean number of medications taken of 3.83, described that 80.74% of the medications  
48  
49  
50 298 were known by the patients (21).  
51  
52  
53  
54 299 Persall *et al.*, included 616 patients in their study. Only 13.5% of patients did not know any of  
55  
56  
57 300 the indications. They also noted a significant lack of knowledge of their patients for  
58  
59  
60 301 cardiovascular medications (19).

1  
2  
3 302 Although patients' levels of knowledge and compliance were low, the importance they placed  
4  
5  
6  
7 303 on their treatment was high. Patient ratings showed that the majority of prescribed drug classes  
8  
9  
10 304 were considered important to them. Only four ATC classes scored below average. This result  
11  
12  
13 305 confirms the "necessity" score obtained in the BMQ questionnaire. A French study assessed  
14  
15  
16 306 drug-related representations in patients with multiple myeloma (22). The authors estimated the  
17  
18  
19  
20 307 importance the patient placed on his or her medications. Antithrombotic drugs, unlike our study,  
21  
22  
23 308 were rated lower, whereas anticancer drugs scored highest. This significant difference between  
24  
25  
26 309 medications that are all part of the overall management of myeloma could be explained by the  
27  
28  
29  
30 310 degree of information provided to patients. Indeed, while the direct link between anticancer  
31  
32  
33 311 drugs and myeloma can easily be made, the link between antithrombotic drugs and the fatal  
34  
35  
36 312 consequences of myeloma is less intuitive. Our work reports on patients with multiple and  
37  
38  
39  
40 313 varied chronic pathologies, with a large number of prescribed medications. Despite this, few  
41  
42  
43 314 differences were observed between ATC classes and therefore chronic pathologies. For a  
44  
45  
46 315 majority of patients, all treatments were equivalent in importance. Indeed, even if the patients  
47  
48  
49  
50 316 did not spontaneously cite their symptomatic treatments, they gave them a high importance.  
51  
52  
53 317 This is due to the perceived immediate effect of using these treatments. This result is consistent  
54  
55  
56 318 with another study (23) that showed that patients were more familiar with analgesics than with  
57  
58  
59  
60

1  
2  
3  
4 319 cardiovascular drugs, because they felt their effects directly. Lastly, in our study, patients were  
5  
6  
7 320 very familiar with the effects of their symptomatic medications but did not cite them directly.  
8  
9  
10 321 If representations about treatments influence patient adherence, adherence is also determined  
11  
12  
13 322 by the relationship of trust with the physician. Several studies have shown that the relationship  
14  
15  
16 323 between the physician and the patient has a significant impact on the feeling of usefulness and  
17  
18  
19 324 efficacy of the treatment, but also on adherence (24). Studies have shown that when patients  
20  
21  
22 325 had sufficient information and understood the purpose of their treatment, they had better  
23  
24  
25 326 compliance (25). In our study, the majority of patients reported receiving information about  
26  
27  
28 327 their treatment, but one third felt that this was not sufficient.  
29  
30  
31  
32  
33 328 Assessing patients' beliefs would allow us to better target their priorities, and thus to develop  
34  
35  
36 329 adapted educational actions and tools. Indeed, understanding the mechanisms and potential  
37  
38  
39 330 evolution of the disease will make it easier for patients to assimilate the objectives of their  
40  
41  
42 331 treatments and will facilitate their therapeutic adherence (26).  
43  
44  
45  
46  
47  
48

332

### 333 **Strengths and biases**

334 To our knowledge, the representation and beliefs of chronic treatments have not been studied  
335 in a vascular medicine and surgery department, in patients with multiple medications and

1  
2  
3  
4 336 cardiac pathologies. This is a single-center study. It would be interesting to conduct this work  
5  
6  
7 337 in other centers in order to obtain generalizable and transferable results.  
8  
9 338 In our study, the BMQ was used for a combination of several diseases, whereas its French  
10  
11  
12 339 version has only been validated for diabetes and HIV (10). Thus, patients with several chronic  
13  
14  
15  
16 340 diseases may not have the same representations regarding the treatments for each disease. The  
17  
18  
19 341 scores given by patients on each of their treatments were used to estimate the level of  
20  
21  
22 342 importance given to each medication. Finally, for the majority of patients, all their medications  
23  
24  
25  
26 343 were equally important, which may indicate a lack of prioritization.  
27  
28  
29 344 Another limitation of our study is the use of a questionnaire alone to assess adherence, when  
30  
31  
32 345 several methods of measuring adherence exist (direct and indirect methods). Although the  
33  
34  
35  
36 346 questionnaire is a simple, quick and inexpensive technique, it is less robust when used alone.  
37  
38  
39 347 Many authors recommend using at least two methods. In addition, the use of questionnaires  
40  
41  
42 348 tends to overestimate compliance (27) which may seem worrying in view of the already low  
43  
44  
45  
46 349 adherence reported in our results. In the context of short-stay inpatients, it was not possible to  
47  
48  
49 350 use direct methods (drug measurements, biological marker measurements), or to use any other  
50  
51  
52 351 indirect method than the questionnaire. Moreover, this would have lengthened the interview  
53  
54  
55  
56 352 time with the patients and thus made the procedure more cumbersome.  
57  
58  
59  
60

1  
2  
3 353 Concerning the evaluation of knowledge, the hospitalization of our population certainly had an  
4  
5  
6  
7 354 impact on the real knowledge of the patients about their treatment. Being in a stressful  
8  
9  
10 355 environment, in a context of acute pathology, could potentially have decreased their true  
11  
12  
13 356 knowledge of the names and indications of their treatment, inducing a bias.  
14  
15  
16  
17 357 One of the exclusion criteria for the study was cognitive impairment. This was assessed  
18  
19  
20 358 clinically but was not confirmed by a specific assessment test such as Mini Mental State  
21  
22  
23 359 Examination (MMSE). This would have again made the protocol and interviews more  
24  
25  
26  
27 360 cumbersome.  
28  
29  
30  
31  
32  
33  
34  
35  
36  
37  
38  
39  
40  
41  
42  
43  
44  
45  
46  
47  
48  
49  
50  
51  
52  
53  
54  
55  
56  
57  
58  
59  
60

361

## 362 **Conclusion**

363 The level of knowledge and compliance of patients with multiple chronic diseases in surgery  
364 and vascular medicine is low. Representations of the disease and of medication have an impact  
365 on patients' behaviour. They are determinants of adherence to medication. Identifying patients'  
366 beliefs about their chronic treatment allows caregivers to adapt information to patients' needs.  
367 Better information from healthcare professionals (physician, nurse, pharmacist, etc.) regarding  
368 the indication and efficacy of the prescribed treatment is essential. Combined with the  
369 consideration of patients' concerns, particularly regarding tolerance, this will improve the



370 benefit/concern ratio perceived by these patients, and thus increase their compliance. The BMQ

371 may help to identify patients at risk of poor compliance.

372

373

374

375

376

377

## 378 **Bibliography**

379 1. Michel Chassang, Anne Gautier. [www.lecese.fr](http://www.lecese.fr) [En ligne]. Les maladies chroniques

380 [cité le 21 janvier 2022]. Disponible:

381 [https://www.lecese.fr/sites/default/files/pdf/Avis/2019/2019\\_14\\_maladies\\_chroniques.pdf](https://www.lecese.fr/sites/default/files/pdf/Avis/2019/2019_14_maladies_chroniques.pdf)

382 2. WHO Chronic disease report [En ligne]. [cité le 21 janvier 2022]. Disponible:

383 [https://www.who.int/chp/chronic\\_disease\\_report/media/information/factsheets\\_FR\\_web.pdf](https://www.who.int/chp/chronic_disease_report/media/information/factsheets_FR_web.pdf)

384 3. S.Briançon, G.Guérin, B.Sandrin-Berthon. [En ligne]. [cité le 21 janvier 2022].

385 Disponible: 2010-09-adsp-n°72-maladies-chroniques-et-ETP.pdf.

386 4. J.P. Laroche, B. Guilbert, G.Miserey, P. Goffette, Conseil National Professionnel de

387 Médecine Vasculaire, Médecine Vasculaire - Etat des lieux 2015. [En ligne]. [cité le 26 juillet

1  
2  
3  
4 388 2022]. Disponible:

5  
6  
7 389 [https://www.portailvasculaire.fr/sites/default/files/docs/livre\\_blanc\\_2015.pdf](https://www.portailvasculaire.fr/sites/default/files/docs/livre_blanc_2015.pdf)

8  
9  
10 390 5. M. Monégat, C. Sermet, M. Perronnin, E. Rococo, la polymédication définitions

11  
12  
13 391 mesures et enjeux. [En ligne]. [cité le 3 janvier 2022]. Disponible:

14  
15  
16 392 [https://www.irdes.fr/recherche/questions-d-economie-de-la-sante/204-la-polymedication-](https://www.irdes.fr/recherche/questions-d-economie-de-la-sante/204-la-polymedication-definitions-mesures-et-enjeux.pdf)

17  
18  
19 393 [definitions-mesures-et-enjeux.pdf](https://www.irdes.fr/recherche/questions-d-economie-de-la-sante/204-la-polymedication-definitions-mesures-et-enjeux.pdf)

20  
21  
22 394 6. Le Cossec C. La polymédication au regard de différents indicateurs de sa mesure:

23  
24  
25 395 impact sur la prévalence, les classes thérapeutiques concernées et les facteurs associés. Paris:

26  
27  
28 396 IRDES; 2015. (Les rapports de l'IRDES).

29  
30  
31 397 7. M. P. Schneider, L. Herzig, D. Hugentobler Hampai, O. Bugnon. Revue Medicale

32  
33  
34 398 Suisse. Adhésion thérapeutique du patient chronique : des concepts à la prise en charge

35  
36  
37 399 ambulatoire [En ligne]. [cité le 3 janvier 2022]. Disponible: [https://www.revmed.ch/revue-](https://www.revmed.ch/revue-medicale-suisse/2013/revue-medicale-suisse-386/adhesion-therapeutique-du-patient-chronique-des-concepts-a-la-prise-en-charge-ambulatoire)

38  
39  
40 400 [medicale-suisse/2013/revue-medicale-suisse-386/adhesion-therapeutique-du-patient-](https://www.revmed.ch/revue-medicale-suisse/2013/revue-medicale-suisse-386/adhesion-therapeutique-du-patient-chronique-des-concepts-a-la-prise-en-charge-ambulatoire)

41  
42  
43 401 [chronique-des-concepts-a-la-prise-en-charge-ambulatoire](https://www.revmed.ch/revue-medicale-suisse/2013/revue-medicale-suisse-386/adhesion-therapeutique-du-patient-chronique-des-concepts-a-la-prise-en-charge-ambulatoire)

44  
45  
46 402 8. Turrise S. Illness Representations, Treatment Beliefs, Medication Adherence, and 30-

47  
48  
49 403 Day Hospital Readmission in Adults With Chronic Heart Failure: A Prospective Correlational

50  
51  
52 404 Study. J Cardiovasc Nurs. 2016;31(3):245-54. DOI: 10.1097/JCN.0000000000000249

- 1  
2  
3  
4 405 9. Horne R, Weinman J, Hankins M. The beliefs about medicines questionnaire: The  
5  
6  
7 406 development and evaluation of a new method for assessing the cognitive representation of  
8  
9  
10 407 medication. *Psychol Health*. 1999;14(1):1-24. DOI: 10.1080/08870449908407311  
11  
12  
13 408 10. Masson E. EM-Consulte. Validation of the French version of the Beliefs about  
14  
15  
16 409 Medicines Questionnaire (BMQ) among diabetes and HIV patients [En ligne]. [cité le 3  
17  
18  
19 410 janvier 2022]. Disponible: [https://www.em-consulte.com/article/934270/validation-of-the-](https://www.em-consulte.com/article/934270/validation-of-the-french-version-of-the-beliefs-ab)  
20  
21  
22 411 [french-version-of-the-beliefs-ab](https://www.em-consulte.com/article/934270/validation-of-the-french-version-of-the-beliefs-ab)  
23  
24  
25  
26  
27 412 11. Horne R, Weinman J. Patients' beliefs about prescribed medicines and their role in  
28  
29  
30 413 adherence to treatment in chronic physical illness. *J Psychosom Res*. 1999;47(6):555-67.  
31  
32  
33 414 DOI: 10.1016/S0022-3999(99)00057-4  
34  
35  
36  
37 415 12. Charles C, Ninot G, Sultan S. Représentations des patients et observance des  
38  
39  
40 416 traitements par corticostéroïdes inhalés dans l'asthme. Revue systématique sur la période  
41  
42  
43 417 1999–2009. *Rev Mal Respir*. 2011;28(5):626-35. DOI: 10.1016/j.rmr.2010.11.003  
44  
45  
46  
47 418 13. Girerd X, Hanon O, Anagnostopoulos K, Ciupek C, Mourad JJ, Consoli S.  
48  
49  
50 419 [Assessment of antihypertensive compliance using a self-administered questionnaire:  
51  
52  
53 420 development and use in a hypertension clinic]. *Presse Medicale Paris Fr* 1983.  
54  
55  
56  
57 421 2001;30(21):1044-8.  
58  
59  
60

- 1  
2  
3  
4 422 14. Torrecillas S, Perrot E, Gérinière L, Locatelli-Sanchez M, Laffay L, Souquet P-J, et al.  
5  
6  
7 423 Croyances des patients envers les thérapies ciblées orales et leur influence sur l'observance  
8  
9  
10 424 dans le cancer broncho-pulmonaire : une étude pilote prospective. Rev Pneumol Clin.  
11  
12  
13 425 2016;72(1):25-34. DOI: 10.1016/j.pneumo.2015.03.005  
14  
15  
16  
17 426 15. Déat et al. Croyances à propos des médicaments et observance chez les patients  
18  
19  
20 427 atteints de maladie chronique. Exerc Rev Francoph Médecine Générale. 28(138):436.  
21  
22  
23  
24 428 16. Huon J-F, Lenain E, LeGuen J, Chatellier G, Sabatier B, Saint-Jean O. How Drug Use  
25  
26  
27 429 by French Elderly Patients Has Changed During the Last Decade. Drugs - Real World  
28  
29  
30 430 Outcomes. 2015;2(4):327-33. DOI: 10.1007/s40801-015-0041-6  
31  
32  
33  
34 431 17. Bruyer B. Évaluation des connaissances que les patients ont de leurs traitements et du  
35  
36  
37 432 temps d'éducation thérapeutique en consultation de médecine générale ou en pharmacie.  
38  
39  
40 433 2020;62.  
41  
42  
43  
44 434 18. Chung MK, Bartfield JM. Knowledge of prescription medications among elderly  
45  
46  
47 435 emergency department patients. Ann Emerg Med. 2002;39(6):605-8. DOI:  
48  
49  
50 436 10.1067/mem.2002.122853  
51  
52  
53  
54 437 19. Persell SD, Heiman HL, Weingart SN, Burdick E, Borus JS, Murff HJ, et al.  
55  
56  
57 438 Understanding of drug indications by ambulatory care patients. Am J Health Syst Pharm.  
58  
59  
60 439 2004;61(23):2523-7. DOI: 10.1093/ajhp/61.23.2523

- 1  
2  
3  
4 440 20. Akici A, Kalaça S, Uğurlu MU, Toklu HZ, Iskender E, Oktay S. Patient knowledge  
5  
6  
7 441 about drugs prescribed at primary healthcare facilities. *Pharmacoepidemiol Drug Saf.*  
8  
9  
10 442 2004;13(12):871-6. DOI: 10.1002/pds.1020  
11  
12  
13 443 21. Haidar-Ahmad F. Les facteurs influençant la connaissance du traitement chronique :  
14  
15  
16 444 étude menée sur 351 patients dans les 14ème, 15ème et 16ème arrondissements de Marseille.  
17  
18  
19  
20 445 2019;51. DOI: 10/document  
21  
22  
23 446 22. Huon J-F, Fronteau C, Caffin A-G, Ranchon F, Quinio F, Maucourant L, et al.  
24  
25  
26 447 Évaluation des représentations relatives aux médicaments chez les patients atteints de  
27  
28  
29  
30 448 myélome multiple. *Educ Thérapeutique Patient - Ther Patient Educ.* EDP Sciences;  
31  
32  
33 449 2017;9(1):10101. DOI: 10.1051/tpe/2017002  
34  
35  
36 450 23. Oudjhani M, Foison O, Astier A. Est-ce que les sujets âgés connaissent leurs  
37  
38  
39  
40 451 traitements ? *J Pharm Clin.* 2012;31(2):113-6. DOI: 10.1684/jpc.2012.0215  
41  
42  
43 452 24. Fuertes JN, Mislowack A, Bennett J, Paul L, Gilbert TC, Fontan G, et al. The  
44  
45  
46 453 physician–patient working alliance. *Patient Educ Couns.* 2007;66(1):29-36. DOI:  
47  
48  
49  
50 454 10.1016/j.pec.2006.09.013  
51  
52  
53 455 25. Monnier G, Charpiat B, Serratrice F, Bossaert S, Fourcade N, Ducerf C. Evaluation de  
54  
55  
56 456 l’apport d’une consultation de pharmacie sur les connaissances des patients transplantés  
57  
58  
59  
60 457 hépatiques. *Therapies.* 2003;58(4):305-11. DOI: 10.2515/therapie:2003047

- 1  
2  
3  
4 458 26. Kelly M, McCarthy S, Sahm LJ. Knowledge, attitudes and beliefs of patients and  
5  
6  
7 459 carers regarding medication adherence: a review of qualitative literature. Eur J Clin  
8  
9  
10 460 Pharmacol. 2014;70(12):1423-31. DOI: 10.1007/s00228-014-1761-3  
11  
12  
13 461 27. Allenet B, Baudrant M, Lehmann A, Gauchet A, Roustit M, Bedouch P, et al.  
14  
15  
16 462 Comment évaluer l'adhésion médicamenteuse ? Le point sur les méthodes. Ann Pharm Fr.  
17  
18  
19  
20 463 2013;71(2):135-41. DOI: 10.1016/j.pharma.2012.10.001  
21  
22  
23  
24 464  
25  
26  
27  
28  
29  
30  
31  
32  
33  
34  
35  
36  
37  
38  
39  
40  
41  
42  
43  
44  
45  
46  
47  
48  
49  
50  
51  
52  
53  
54  
55  
56  
57  
58  
59  
60

1  
2  
3  
4 466 **Acknowledgments**  
5  
6

7 467 The authors would like to thank all the staff members of the medicine and vascular surgery  
8  
9  
10  
11 468 for their kind help in performing this study.  
12  
13

14 469

15  
16  
17 470 **Funding**  
18  
19

20  
21 471 No funding was obtained for this study.  
22  
23

24 472

25  
26  
27 473 **Data Availability Statement**  
28  
29

30  
31 474 The data underlying this article will be shared on reasonable request to the corresponding  
32  
33  
34 475 author.  
35  
36

37 476

38  
39 477 **Conflict of Interest**  
40  
41

42  
43 478 The Author(s) declare(s) that there is no conflict of interest.  
44  
45  
46  
47  
48  
49  
50  
51  
52  
53  
54  
55  
56  
57  
58  
59  
60

1  
2  
3  
4 479 **Legends**  
5  
6

7 480 **Figure 1:** Responses to the BMQ questionnaire (percentage of responses among the 100  
8  
9 481 patients)  
10  
11  
12  
13  
14  
15  
16  
17  
18  
19  
20  
21  
22  
23  
24  
25  
26  
27  
28  
29  
30  
31  
32  
33  
34  
35  
36  
37  
38  
39  
40  
41  
42  
43  
44  
45  
46  
47  
48  
49  
50  
51  
52  
53  
54  
55  
56  
57  
58  
59  
60

For peer review only



482 **Tables**483 **Table 1. Characteristics of the population (N=100) and the drugs (N=965)**

| <b>Characteristics of patients</b>                                  | <b>N=100</b>            |
|---------------------------------------------------------------------|-------------------------|
| Female sex                                                          | 31 (31.0%)              |
| Age (years)                                                         | 70.8 ± 10.7 [38.0;92.0] |
| Time since first chronic treatment (years)                          | 19.4 ± 12.4 [0.5;58.0]  |
| Level of study                                                      |                         |
| Secondary level                                                     | 45 (45.0%)              |
| Higher study                                                        | 24 (24.0%)              |
| Primary level                                                       | 24 (24.0%)              |
| Lack of study                                                       | 7 (7.0%)                |
| Socio-professional category                                         |                         |
| Workers                                                             | 31 (31.0%)              |
| Intermediate professions                                            | 18 (18.0%)              |
| Employees                                                           | 17 (17.0%)              |
| Executives, Higher intellectual professions                         | 14 (14.0%)              |
| Craftsmen, Shopkeeper, Compagny managers                            | 12 (12.0%)              |
| Farmer                                                              | 5 (5.0%)                |
| Other†                                                              | 3 (3.0%)                |
| Lifestyle                                                           |                         |
| Circled                                                             | 91 (91.0%)              |
| Alone                                                               | 9 (9.0%)                |
| Organization around medication intake                               |                         |
| Autonomous                                                          | 83 (83.0%)              |
| Help from relatives (partner, children)                             | 11 (11.0%)              |
| Assistance from a nurse                                             | 6 (6.0%)                |
| Information received at the start of treatment                      | 87 (87.0%)              |
| Source of information                                               |                         |
| From the general practitioner                                       | 73 (73.0%)              |
| From the specialist doctor                                          | 61 (61.0%)              |
| From the pharmacist                                                 | 46 (46.0%)              |
| From family and friends                                             | 5 (5.0%)                |
| Information received perceived as sufficient by the patient         | 64 (64.0%)              |
| Need for additional research (Internet, books, magazines, leaflets) | 27 (27.0%)              |
| <b>Drug Characteristics</b>                                         | <b>N=965</b>            |

|                                               |                  |
|-----------------------------------------------|------------------|
| Number of drugs per patient                   | 9.7 ± 3.6 [5;21] |
| ATC class od of drugs                         |                  |
| Cardiovascular (C)                            | 310 (32.0%)      |
| Digestive tract and metabolism (A)            | 190 (19.8%)      |
| Nervous System (N)                            | 175 (18.0%)      |
| Blood and blood-forming organs (B)            | 141 (14.6%)      |
| Respiratory system(R)                         | 47 (4.9%)        |
| Systemic hormones, excluding sex hormones (H) | 19 (2.0%)        |
| Other‡                                        | 83 (8.7%)        |

484 Results are presented as mean ± standard deviation [minimum-maximum] for quantitative variables and as counts  
 485 (%) for qualitative variables

486 \*To the question "Since when have you been taking your first chronic treatment?", 4 patients were unable to  
 487 answer.

488 †Other occupations: Farmer (5%), Housewife (2%), No occupation (1%)

489 ‡Other ATC class: H-Systemic hormones, excluding sex hormones (2.0%), J-General anti-infectives for systemic  
 490 use (0.8%), L-Antineoplastics and immunomodulators (1.6%), P-Antiparasitic, insecticides (0.1%), V-  
 491 Miscellaneous (0.6%), D-Dermatological drugs (0.5%), M-Muscle and skeletal (1.4%), S-Sensory organs (1%),  
 492 G-Genitourinary system and sex hormones (1.7%), No ATC class (1%)

494 **Table 2. BMQ score results - Beliefs**

| BMQ* - Beliefs                   | N = 100             | Male<br>N = 69 | Female<br>N = 31 | p-value       |
|----------------------------------|---------------------|----------------|------------------|---------------|
| Specific Beliefs - Necessity     | 21.9±3.5 [8.0;25.0] | 21.7±3.6       | 22.2±3.1         | 0,4822        |
| Specific Beliefs - Concerns      | 11.1±4.8 [5.0;23.0] | 10.5±4.4       | 12.5±5.5         | 0.0509        |
| General Beliefs - Harm           | 9.1±3.2 [4.0;17.0]  | 8.6±3.0        | 10.1±3.5         | <b>0.0352</b> |
| General Beliefs - Overuse        | 10.3±3.4 [4.0;17.0] | 9.8±3.4        | 11.5±3.3         | <b>0.0170</b> |
| BMQ Necessity - BMQ Concern > 0† | 96 (96.0%)          | 66 (95.7%)     | 30 (96.0%)       | 1.0000        |

495 Results are presented as mean ± standard deviation [minimum-maximum] or numbers and percentages

496 Specific belief scores range from 5 to 25 and general belief scores range from 4 to 20. A high score indicates a  
 497 strong belief.

498 \*BMQ: Belief Medical Questionnaire

499 †BMQ "necessity" - BMQ "concern" > 0 means that the beneficial character is superior to the worrying character.

500

501

502 **Table 3. Responses to the GIRERD questionnaire and correlations between compliance and**  
 503 **beliefs (N=100)**

| Questions and number of positive responses                                                                                |                 |                  |                  | N (%)         |
|---------------------------------------------------------------------------------------------------------------------------|-----------------|------------------|------------------|---------------|
| Did you forget to take your medication this morning?                                                                      |                 |                  |                  | 1 (1.0%)      |
| Since your last visit, have you run out of medication?                                                                    |                 |                  |                  | 7 (7.0%)      |
| Have you ever taken your medication late compared to the usual time?                                                      |                 |                  |                  | 43 (43.0%)    |
| Have you ever not taken your medication because your memory fails you some days?                                          |                 |                  |                  | 23 (23.0%)    |
| Have you ever not taken your medication because some days you feel that your medication is doing you more harm than good? |                 |                  |                  | 9 (9.0%)      |
| Do you think you have too many pills to take?                                                                             |                 |                  |                  | 61 (61.0%)    |
|                                                                                                                           | Good compliance | Low compliance   | Non-compliance   | p-value       |
|                                                                                                                           | N = 11 (11.0%)  | N = 79 (79.0%)   | N = 10 (10.0%)   |               |
| Specific Beliefs - Necessity                                                                                              | 21.0 [6.0;12]   | 23.0 [21.0;25.0] | 23.0 [16.0;24.0] | 0.6487        |
| Specific Beliefs - Concerns                                                                                               | 9.0 [6.0;12.0]  | 11.0 [6.0;14.0]  | 17.0 [9.0;20.0]  | 0.1163        |
| BMQ Necessity - BMQ Concern > 0†                                                                                          | 11 (100.0%)     | 78 (98.7%)       | 7 (70.0%)        | <b>0.0039</b> |
| General Beliefs - Harm                                                                                                    | 9.0 [6.0;12.0]  | 8.0 [6.0 ;11.0]  | 11.5[9.0 ;16.0]  | 0.0739        |
| General Beliefs - Overconsumption                                                                                         | 8.0 [5.0 ;12.0] | 10.0 [8.0 ;13.0] | 13.0 [9.0 ;16.0] | 0.1086        |

504 The results are presented in median [1st Quartile; 3rd Quartile] for quantitative variables and in the form of  
 505 numbers (%) for qualitative variables

506 Specific belief scores range from 5 to 25 and general belief scores range from 4 to 20. A high score indicates a  
 507 strong belief.

508 \*GIRERD score: six negative ("no") responses: patient is "good compliance". Four or five "no" responses: patient  
 509 is "poorly compliant". Two or three "no" responses: the patient is "non-observant".

510 †BMQ "necessity" - BMQ "concern" > 0 means that the beneficial character is superior to the worrying character.

511 BMQ: Belief Medical Questionnaire

1  
2  
3  
4 512 **Table 4.** *Correlation between adherence, beliefs and knowledge about their treatments for the*  
5  
6 513 *100 patients*

7  
8 514 Example: In patients with low adherence, the more they know about the indications for their treatments, the less  
9 515 fear they have that the medications will be harmful.

|                           | Beliefs                      | Drugs mentionned |               | Known indications |               |
|---------------------------|------------------------------|------------------|---------------|-------------------|---------------|
|                           |                              | r                | p             | r                 | p             |
| Good compliance<br>(N=11) | Specific Beliefs - Necessity | -0.22            | 0.5220        | 0.17              | 0.6185        |
|                           | Specific Beliefs - Concerns  | -0.01            | 0.9837        | -0.11             | 0.7403        |
|                           | General Beliefs - Harm       | 0.07             | 0.8488        | 0.15              | 0.6686        |
|                           | General Beliefs - Overuse    | 0.37             | 0.2651        | 0.26              | 0.442         |
| Low compliance<br>(N=79)  | Specific Beliefs - Necessity | 0.01             | 0.9540        | -0.07             | 0.5457        |
|                           | Specific Beliefs - Concerns  | -0.12            | 0.2994        | -0.11             | 0.3491        |
|                           | General Beliefs - Harm       | -0.21            | 0.0689        | -0.30             | <b>0.0069</b> |
|                           | General Beliefs - Overuse    | -0.23            | <b>0.0401</b> | -0.21             | 0.0630        |
| Non-compliance<br>(N=10)  | Specific Beliefs - Necessity | -0.35            | 0.3216        | -0.43             | 0.2149        |
|                           | Specific Beliefs - Concerns  | 0.41             | 0.2434        | 0.44              | 0.2064        |
|                           | General Beliefs - Harm       | 0.21             | 0.5643        | 0.57              | 0.0858        |
|                           | General Beliefs - Overuse    | 0.38             | 0.2726        | 0.47              | 0.1677        |

34 516  
35  
36  
37  
38  
39  
40  
41  
42  
43  
44  
45  
46  
47  
48  
49  
50  
51  
52  
53  
54  
55  
56  
57  
58  
59  
60

1  
2  
3  
4 517 **Contributors** : DK, JS, MB, SPL and JFH contributed to the study conception and design. Data  
5  
6  
7 518 collection and analysis were performed by DK. The first draft of the manuscript was written by  
8  
9  
10 519 DK and JS, MB, AB, SPL and JFH commented on previous versions of the manuscript. All  
11  
12  
13  
14 520 authors read and approved the final manuscript.  
15  
16  
17  
18  
19  
20  
21  
22  
23  
24  
25  
26  
27  
28  
29  
30  
31  
32  
33  
34  
35  
36  
37  
38  
39  
40  
41  
42  
43  
44  
45  
46  
47  
48  
49  
50  
51  
52  
53  
54  
55  
56  
57  
58  
59  
60

For peer review only

**Figure 1:** Responses to the BMQ questionnaire (percentage of responses among the 100 patients)

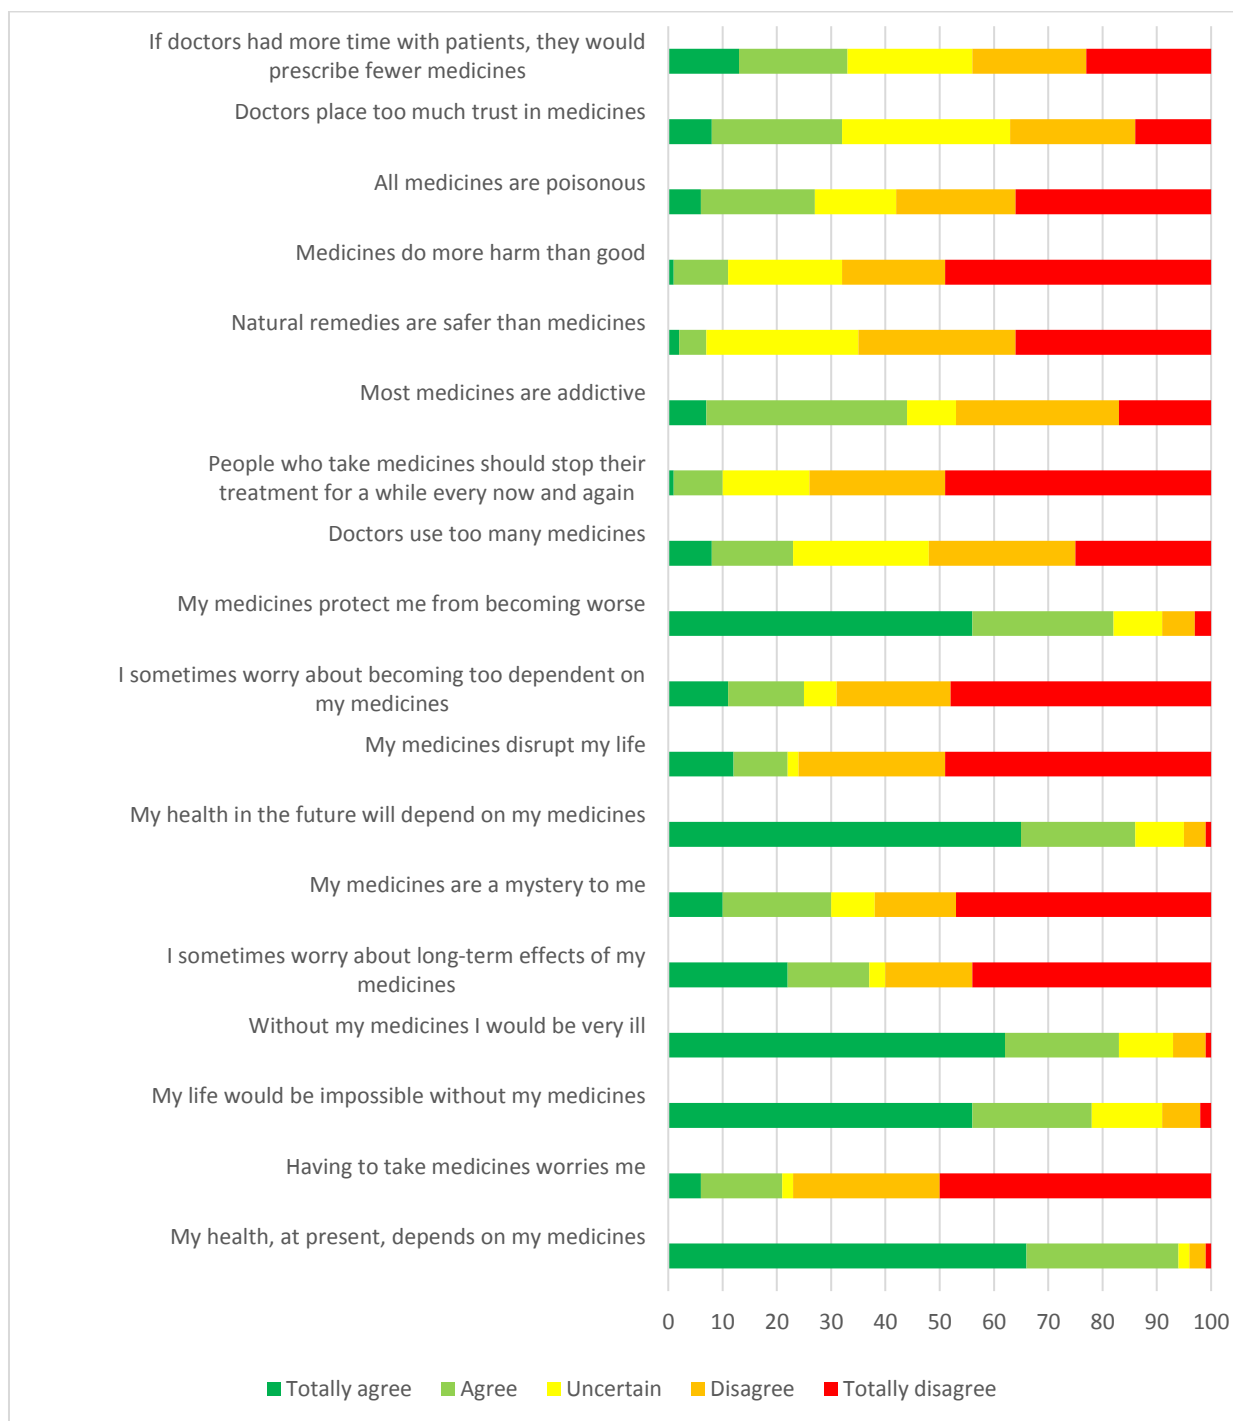

# Reporting checklist for cross sectional study.

Evaluation of beliefs and representations of chronic treatments of patients hospitalized in  
 medicine and vascular surgery

D. Kotry *et al.*

Based on the STROBE cross sectional guidelines.

## Instructions to authors

Complete this checklist by entering the page numbers from your manuscript where readers will find each of the items listed below.

Your article may not currently address all the items on the checklist. Please modify your text to include the missing information. If you are certain that an item does not apply, please write "n/a" and provide a short explanation.

Upload your completed checklist as an extra file when you submit to a journal.

In your methods section, say that you used the STROBE cross sectional reporting guidelines, and cite them as:

von Elm E, Altman DG, Egger M, Pocock SJ, Gotsche PC, Vandenbroucke JP. The Strengthening the Reporting of Observational Studies in Epidemiology (STROBE) Statement: guidelines for reporting observational studies.

Page

Reporting Item

Number

**Title and abstract**



|    |                      |                     |                                                                 |     |
|----|----------------------|---------------------|-----------------------------------------------------------------|-----|
| 1  | Title                | <a href="#">#1a</a> | Indicate the study's design with a commonly used term in the    | 1   |
| 2  |                      |                     | title or the abstract                                           |     |
| 3  |                      |                     |                                                                 |     |
| 4  |                      |                     |                                                                 |     |
| 5  |                      |                     |                                                                 |     |
| 6  | Abstract             | <a href="#">#1b</a> | Provide in the abstract an informative and balanced summary     | 2-3 |
| 7  |                      |                     | of what was done and what was found                             |     |
| 8  |                      |                     |                                                                 |     |
| 9  |                      |                     |                                                                 |     |
| 10 |                      |                     |                                                                 |     |
| 11 | <b>Introduction</b>  |                     |                                                                 |     |
| 12 |                      |                     |                                                                 |     |
| 13 |                      |                     |                                                                 |     |
| 14 |                      |                     |                                                                 |     |
| 15 | Background /         | <a href="#">#2</a>  | Explain the scientific background and rationale for the         | 4   |
| 16 | rationale            |                     | investigation being reported                                    |     |
| 17 |                      |                     |                                                                 |     |
| 18 |                      |                     |                                                                 |     |
| 19 |                      |                     |                                                                 |     |
| 20 | Objectives           | <a href="#">#3</a>  | State specific objectives, including any prespecified           | 5   |
| 21 |                      |                     | hypotheses                                                      |     |
| 22 |                      |                     |                                                                 |     |
| 23 |                      |                     |                                                                 |     |
| 24 |                      |                     |                                                                 |     |
| 25 | <b>Methods</b>       |                     |                                                                 |     |
| 26 |                      |                     |                                                                 |     |
| 27 |                      |                     |                                                                 |     |
| 28 |                      |                     |                                                                 |     |
| 29 | Study design         | <a href="#">#4</a>  | Present key elements of study design early in the paper         | 5   |
| 30 |                      |                     |                                                                 |     |
| 31 |                      |                     |                                                                 |     |
| 32 | Setting              | <a href="#">#5</a>  | Describe the setting, locations, and relevant dates, including  | 5   |
| 33 |                      |                     | periods of recruitment, exposure, follow-up, and data           |     |
| 34 |                      |                     | collection                                                      |     |
| 35 |                      |                     |                                                                 |     |
| 36 |                      |                     |                                                                 |     |
| 37 |                      |                     |                                                                 |     |
| 38 |                      |                     |                                                                 |     |
| 39 | Eligibility criteria | <a href="#">#6a</a> | Give the eligibility criteria, and the sources and methods of   | 5   |
| 40 |                      |                     | selection of participants.                                      |     |
| 41 |                      |                     |                                                                 |     |
| 42 |                      |                     |                                                                 |     |
| 43 |                      |                     |                                                                 |     |
| 44 |                      |                     |                                                                 |     |
| 45 |                      | <a href="#">#7</a>  | Clearly define all outcomes, exposures, predictors, potential   | 5-6 |
| 46 |                      |                     | confounders, and effect modifiers. Give diagnostic criteria, if |     |
| 47 |                      |                     | applicable                                                      |     |
| 48 |                      |                     |                                                                 |     |
| 49 |                      |                     |                                                                 |     |
| 50 |                      |                     |                                                                 |     |
| 51 |                      |                     |                                                                 |     |
| 52 | Data sources /       | <a href="#">#8</a>  | For each variable of interest give sources of data and details  | 5-6 |
| 53 | measurement          |                     | of methods of assessment (measurement). Describe                |     |
| 54 |                      |                     | comparability of assessment methods if there is more than       |     |
| 55 |                      |                     |                                                                 |     |
| 56 |                      |                     |                                                                 |     |
| 57 |                      |                     |                                                                 |     |
| 58 |                      |                     |                                                                 |     |
| 59 |                      |                     |                                                                 |     |
| 60 |                      |                     |                                                                 |     |

one group. Give information separately for for exposed and unexposed groups if applicable.

|    |                |                      |                                                               |
|----|----------------|----------------------|---------------------------------------------------------------|
| 1  |                |                      |                                                               |
| 2  |                |                      |                                                               |
| 3  |                |                      |                                                               |
| 4  |                |                      |                                                               |
| 5  |                |                      |                                                               |
| 6  | Bias           | <a href="#">#9</a>   | Describe any efforts to address potential sources of bias     |
| 7  |                |                      |                                                               |
| 8  |                |                      |                                                               |
| 9  | Study size     | <a href="#">#10</a>  | Explain how the study size was arrived at                     |
| 10 |                |                      |                                                               |
| 11 |                |                      |                                                               |
| 12 | Quantitative   | <a href="#">#11</a>  | Explain how quantitative variables were handled in the        |
| 13 |                |                      |                                                               |
| 14 | variables      |                      | analyses. If applicable, describe which groupings were        |
| 15 |                |                      |                                                               |
| 16 |                |                      |                                                               |
| 17 |                |                      | chosen, and why                                               |
| 18 |                |                      |                                                               |
| 19 | Statistical    | <a href="#">#12a</a> | Describe all statistical methods, including those used to     |
| 20 |                |                      |                                                               |
| 21 | methods        |                      | control for confounding                                       |
| 22 |                |                      |                                                               |
| 23 |                |                      |                                                               |
| 24 |                |                      |                                                               |
| 25 | Statistical    | <a href="#">#12b</a> | Describe any methods used to examine subgroups and            |
| 26 |                |                      |                                                               |
| 27 | methods        |                      | interactions                                                  |
| 28 |                |                      |                                                               |
| 29 |                |                      |                                                               |
| 30 | Statistical    | <a href="#">#12c</a> | Explain how missing data were addressed                       |
| 31 |                |                      |                                                               |
| 32 | methods        |                      |                                                               |
| 33 |                |                      |                                                               |
| 34 |                |                      |                                                               |
| 35 | Statistical    | <a href="#">#12d</a> | If applicable, describe analytical methods taking account of  |
| 36 |                |                      |                                                               |
| 37 | methods        |                      | sampling strategy                                             |
| 38 |                |                      |                                                               |
| 39 |                |                      |                                                               |
| 40 |                |                      |                                                               |
| 41 | Statistical    | <a href="#">#12e</a> | Describe any sensitivity analyses                             |
| 42 |                |                      |                                                               |
| 43 | methods        |                      |                                                               |
| 44 |                |                      |                                                               |
| 45 |                |                      |                                                               |
| 46 | <b>Results</b> |                      |                                                               |
| 47 |                |                      |                                                               |
| 48 |                |                      |                                                               |
| 49 | Participants   | <a href="#">#13a</a> | Report numbers of individuals at each stage of study—eg       |
| 50 |                |                      |                                                               |
| 51 |                |                      | numbers potentially eligible, examined for eligibility,       |
| 52 |                |                      |                                                               |
| 53 |                |                      | confirmed eligible, included in the study, completing follow- |
| 54 |                |                      |                                                               |
| 55 |                |                      |                                                               |
| 56 |                |                      |                                                               |
| 57 |                |                      |                                                               |
| 58 |                |                      |                                                               |
| 59 |                |                      |                                                               |
| 60 |                |                      |                                                               |

up, and analysed. Give information separately for for  
exposed and unexposed groups if applicable.

|                  |                      |                                                                                                                                                                                                                   |                 |
|------------------|----------------------|-------------------------------------------------------------------------------------------------------------------------------------------------------------------------------------------------------------------|-----------------|
| Participants     | <a href="#">#13b</a> | Give reasons for non-participation at each stage                                                                                                                                                                  | NA              |
| Participants     | <a href="#">#13c</a> | Consider use of a flow diagram                                                                                                                                                                                    | NA              |
| Descriptive data | <a href="#">#14a</a> | Give characteristics of study participants (eg demographic, clinical, social) and information on exposures and potential confounders. Give information separately for exposed and unexposed groups if applicable. | 7               |
| Descriptive data | <a href="#">#14b</a> | Indicate number of participants with missing data for each variable of interest                                                                                                                                   | Table 1         |
| Outcome data     | <a href="#">#15</a>  | Report numbers of outcome events or summary measures. Give information separately for exposed and unexposed groups if applicable.                                                                                 | 7-9 +<br>tables |
| Main results     | <a href="#">#16a</a> | Give unadjusted estimates and, if applicable, confounder-adjusted estimates and their precision (eg, 95% confidence interval). Make clear which confounders were adjusted for and why they were included          | 7-9 +<br>tables |
| Main results     | <a href="#">#16b</a> | Report category boundaries when continuous variables were categorized                                                                                                                                             | NA              |
| Main results     | <a href="#">#16c</a> | If relevant, consider translating estimates of relative risk into absolute risk for a meaningful time period                                                                                                      | NA              |
| Other analyses   | <a href="#">#17</a>  | Report other analyses done—e.g., analyses of subgroups and interactions, and sensitivity analyses                                                                                                                 | NA              |

## Discussion

|                          |                     |                                                                                                                                                                  |       |
|--------------------------|---------------------|------------------------------------------------------------------------------------------------------------------------------------------------------------------|-------|
| Key results              | <a href="#">#18</a> | Summarise key results with reference to study objectives                                                                                                         | 10    |
| Limitations              | <a href="#">#19</a> | Discuss limitations of the study, taking into account sources of potential bias or imprecision. Discuss both direction and magnitude of any potential bias.      | 14    |
| Interpretation           | <a href="#">#20</a> | Give a cautious overall interpretation considering objectives, limitations, multiplicity of analyses, results from similar studies, and other relevant evidence. | 10-15 |
| Generalisability         | <a href="#">#21</a> | Discuss the generalisability (external validity) of the study results                                                                                            | 14    |
| <b>Other Information</b> |                     |                                                                                                                                                                  |       |
| Funding                  | <a href="#">#22</a> | Give the source of funding and the role of the funders for the present study and, if applicable, for the original study on which the present article is based    | 20    |

The STROBE checklist is distributed under the terms of the Creative Commons Attribution License CC-BY. This checklist was completed on 30. November 2022 using <https://www.goodreports.org/>, a tool made by the [EQUATOR Network](#) in collaboration with [Penelope.ai](#)

## Supplemental Table :

**Supplemental Table.** Correlation between different age categories and patients' knowledge (drugs and indications cited) (N = 100)

|                                 | Age (years) | [30-59]<br>N=10 | [60-69]<br>N=28 | [70-79]<br>N=46 | [80 and more]<br>N=16 | p-value       |
|---------------------------------|-------------|-----------------|-----------------|-----------------|-----------------------|---------------|
| Percentage of drugs cited       | Median      | 83.3            | 46.4            | 40.0            | 28.6                  | <b>0.0193</b> |
|                                 | [Q1;Q3]     | [66.7;100.0]    | [29.7;74.3]     | [18.2;71.4]     | [0.0;66.4]            |               |
|                                 | [Min-Max]   | [20.0 ;100.0]   | [0.0;100.0]     | [0.0;100.0]     | [0.0;100.0]           |               |
| Percentage of known indications | Median      | 100.0           | 75              | 80.9            | 84.5                  | 0.0761        |
|                                 | [Q1;Q3]     | [82.4;100.0]    | [55.2;90.5]     | [54.5;100.0]    | [39.4;100.0]          |               |
|                                 | [Min-Max]   | [60.0;100.0]    | [23.1;100.0]    | [0.0;100.0]     | [0.0;100.0]           |               |

Q1 : First Quartile ; Q3 : Third quartile ; Min : minimum ; Max : maximum

## Supplemental Files 1 : Global questionnaire

Patient n°: .....

Length of the interview: .....

### **Socio-demographic information :**

Gender:                      Age:                      Lifestyle:     Married     Single     Children

Origins:

Level of study:

Socio-professional category:     Farmer                       Craftsmen, Shopkeeper, Compagny managers

Executives, Higher intellectual professions                       Professions intermédiaires

Employees     Workers                      Other:.....

### **Chronic treatment :**

Number of medications on the prescription:

How long have you been taking your first chronic treatment?

### **Informations :**

- Have you ever had your treatments explained to you?    Yes     No
- Do you feel you have received enough information about your treatments?    Yes     No
- From whom did you get information about your treatments?
  - Specialist
  - General practitioner
  - Pharmacist
  - Family

### **Treatment management :**

- Who manages your treatments?
  - Myself
  - A nurse
  - A family member



## Supplemental Files 2 : Belief Medical Questionnaire

**Patient n°:**

Score:

1: Totally disagree, 2: Disagree, 3: Uncertain, 4: Agree, 5: Totally agree

### Specific Beliefs :

1. My health, at present, depends on my medicines:
2. Having to take medicines worries me:
3. My life would be impossible without my medicines:
4. Without my medicines I would be very ill:
5. I sometimes worry about long-term effects of my medicines:
6. My medicines are a mystery to me:
7. My health in the future will depend on my medicines:
8. My medicines disrupt my life:
9. I sometimes worry about becoming too dependent on my medicines:
10. My medicines protect me from becoming worse:

### General Beliefs :

11. Doctors use too many medicines:
12. People who take medicines should stop their treatment for a while every now and again:
13. Most medicines are addictive:
14. Natural remedies are safer than medicines:
15. Medicines do more harm than good:
16. All medicines are poisonous:
17. Doctors place too much trust in medicines:
18. If doctors had more time with patients, they would prescribe fewer medicines:



## Supplemental Files 3 : GIRERD questionnaire

### Assessment of medication compliance

Patient n° :

|                                                                                                                           | YES | NO |
|---------------------------------------------------------------------------------------------------------------------------|-----|----|
| Did you forget to take your medication this morning?                                                                      |     |    |
| Since your last visit, have you run out of medication?                                                                    |     |    |
| Have you ever been late taking your medication?                                                                           |     |    |
| Have you ever not taken your medication because your memory fails you some days?                                          |     |    |
| Have you ever not taken your medication, because some days you feel that your treatment is doing you more harm than good? |     |    |
| Do you think you have too many pills to take?                                                                             |     |    |

## Supplemental Files 4 : The local ethics committee

AVIS 22-06-2201

Groupe Nantais d'Ethique dans le Domaine de la Santé (GNEDS)

|                                        |                                                                                                            |
|----------------------------------------|------------------------------------------------------------------------------------------------------------|
| Nom du protocole<br>Code et versioning | <b>Croyances et représentations chez les patients<br/>polymédiqués en chirurgie et médecine vasculaire</b> |
|----------------------------------------|------------------------------------------------------------------------------------------------------------|

|                                        |                                                                                                          |
|----------------------------------------|----------------------------------------------------------------------------------------------------------|
| Investigateur principal                | Dr JF HUON                                                                                               |
| Lieu de l'étude                        | CHU NANTES                                                                                               |
| Type de l'étude                        | Monocentrique, prospective, exploratoire, observationnelle                                               |
| Type patients/participants             | Patients polymédiqués hospitalisés en chirurgie et médecine vasculaire                                   |
| Nombre de patients/participants prévus | 100                                                                                                      |
| Objectif principal                     | Evaluation de la croyance des patients sur leurs traitements habituels                                   |
| Objectif secondaire                    | Connaissance et importance données par le patient à chacun de ses traitements<br>Adhésion médicamenteuse |

### Documents communiqués

|                                                |     |
|------------------------------------------------|-----|
| Justification de l'étude                       | OUI |
| Méthodologie                                   | OUI |
| Lettre d'information et lettre de consentement | OUI |

### Remarque générale

Le GNEDS formule d'abord la remarque qu'il n'a pas pour mission de donner un avis sur les aspects scientifiques du protocole, en particulier sur l'adéquation de la méthodologie aux objectifs poursuivis par l'étude. Il ne tient compte des données d'ordre scientifique et méthodologique que dans la mesure où elles ont des implications d'ordre éthique. Dans le cas présent, il se bornera à constater que les objectifs de cette étude et sa méthodologie sont conformes aux principes de l'éthique.

### Confidentialité

|                 |      |
|-----------------|------|
| Confidentialité | OUI  |
| Anonymat        | OUI  |
| CNIL            | RGPD |

Commentaires :

**Information et consentement***Consentement :*

|                              |      |
|------------------------------|------|
| Recueil nécessaire           | OUI  |
| Type consentement préférable | ORAL |
| Traçabilité dans le dossier  | NA   |

Commentaires :

*Lettre information précisant :*

|                                              |     |
|----------------------------------------------|-----|
| Titre de l'étude                             | OUI |
| But de l'étude                               | OUI |
| Déroulement de l'étude                       | OUI |
| Prise en charge courante inchangée           | OUI |
| Possibilité de recevoir résultats de l'étude | OUI |
| Traçabilité dans le dossier                  | NA  |

Commentaires :

**Conclusion**

|                                        |     |
|----------------------------------------|-----|
| Avis favorable                         | OUI |
| Révision nécessaire selon commentaires |     |
| Avis défavorable                       |     |

**GNEDS : Professeur Paul BARRIERE**

Nantes le 22 juin 2022



# BMJ Open

## An observational and prospective study: Evaluation of beliefs and representations of chronic treatments of polymedicated patients hospitalized in medicine and vascular surgery

|                                 |                                                                                                                                                                                                                                                                                                                                                                                                                                                                                 |
|---------------------------------|---------------------------------------------------------------------------------------------------------------------------------------------------------------------------------------------------------------------------------------------------------------------------------------------------------------------------------------------------------------------------------------------------------------------------------------------------------------------------------|
| Journal:                        | <i>BMJ Open</i>                                                                                                                                                                                                                                                                                                                                                                                                                                                                 |
| Manuscript ID                   | bmjopen-2023-073250.R1                                                                                                                                                                                                                                                                                                                                                                                                                                                          |
| Article Type:                   | Original research                                                                                                                                                                                                                                                                                                                                                                                                                                                               |
| Date Submitted by the Author:   | 30-Aug-2023                                                                                                                                                                                                                                                                                                                                                                                                                                                                     |
| Complete List of Authors:       | Kotry, Dounia; University Hospital Centre Nantes, Saillard, Justine; CHU Nantes, Pharmacy<br>Bonsergent, Marion; CHU Nantes, Pharmacy<br>Volteau, Christelle; Centre Hospitalier Universitaire de Nantes<br>Benichou, Antoine; CHU Nantes, Internal Medicine<br>Prot-Labarthe, Sonia; Nantes Université, Pharmacie; ECEVE<br>HUON, Jean-François; University Hospital Centre Nantes, Clinical Pharmacy; University of Nantes, Faculty of Pharmacy, Clinical Pharmacy department |
| <b>Primary Subject Heading</b>: | Cardiovascular medicine                                                                                                                                                                                                                                                                                                                                                                                                                                                         |
| Secondary Subject Heading:      | Patient-centred medicine                                                                                                                                                                                                                                                                                                                                                                                                                                                        |
| Keywords:                       | Patient-Centered Care, CLINICAL PHARMACOLOGY, Patient Reported Outcome Measures                                                                                                                                                                                                                                                                                                                                                                                                 |
|                                 |                                                                                                                                                                                                                                                                                                                                                                                                                                                                                 |

SCHOLARONE™  
Manuscripts



I, the Submitting Author has the right to grant and does grant on behalf of all authors of the Work (as defined in the below author licence), an exclusive licence and/or a non-exclusive licence for contributions from authors who are: i) UK Crown employees; ii) where BMJ has agreed a CC-BY licence shall apply, and/or iii) in accordance with the terms applicable for US Federal Government officers or employees acting as part of their official duties; on a worldwide, perpetual, irrevocable, royalty-free basis to BMJ Publishing Group Ltd ("BMJ") its licensees and where the relevant Journal is co-owned by BMJ to the co-owners of the Journal, to publish the Work in this journal and any other BMJ products and to exploit all rights, as set out in our [licence](#).

The Submitting Author accepts and understands that any supply made under these terms is made by BMJ to the Submitting Author unless you are acting as an employee on behalf of your employer or a postgraduate student of an affiliated institution which is paying any applicable article publishing charge ("APC") for Open Access articles. Where the Submitting Author wishes to make the Work available on an Open Access basis (and intends to pay the relevant APC), the terms of reuse of such Open Access shall be governed by a Creative Commons licence – details of these licences and which [Creative Commons](#) licence will apply to this Work are set out in our licence referred to above.

Other than as permitted in any relevant BMJ Author's Self Archiving Policies, I confirm this Work has not been accepted for publication elsewhere, is not being considered for publication elsewhere and does not duplicate material already published. I confirm all authors consent to publication of this Work and authorise the granting of this licence.

1  
2  
3  
4 1 **An observational and prospective study: Evaluation of beliefs and**  
5  
6  
7 2 **representations of chronic treatments of polymedicated patients**  
8  
9  
10 3 **hospitalized in medicine and vascular surgery**  
11  
12

13 4  
14 5 Dounia KOTRY<sup>1</sup>, Justine SAILLARD<sup>1</sup>, Marion BONSERGENT<sup>1</sup>, Christelle VOLTEAU<sup>2</sup>,

16 6 Antoine BENICHO<sup>3</sup>, Sonia PROT-LABARTHE<sup>4</sup>, Jean-François HUON<sup>5</sup>  
17  
18  
19

20 7  
21 8 **University degree:**  
22  
23 9

24 10 Dounia KOTRY, PharmD

25 11 Justine SAILLARD, PharmD

26 12 Marion BONSERGENT, PharmD

27 13 Christelle VOLTEAU

28 14 Antoine BENICHO, MD

29 15 Sonia PROT-LABARTHE, PharmD, PhD

30 16 Jean-François HUON, PharmD, PhD  
31  
32  
33  
34  
35  
36  
37  
38  
39  
40  
41  
42  
43  
44

45 18 **Affiliations:**

46 19 1. Nantes Université, CHU Nantes, Pharmacie, F-44000, France

47 20 2. Plateforme de Méthodologie et Biostatistique, DRi du CHU de Nantes, Nantes, France

48 21 3. Nantes Université, CHU Nantes, Médecine interne, F-44000, France

49 22 4. Nantes Université, CHU Nantes, Pharmacie, F-44000, France, Université Paris Cité,

50 23 INSERM, ECEVE, F-75010 Paris, France  
51  
52  
53  
54  
55  
56  
57  
58  
59  
60

1  
2  
3 24 5. Nantes Université, Univ Tours, CHU Nantes, CHU Tours, Pharmacie, INSERM, MethodS  
4  
5  
6 25 in Patients-centered outcomes and HEalth Research, SPHERE, F-44000 Nantes, France  
7  
8  
9 26

10 27 **Corresponding author:**

11  
12  
13 28 Dounia KOTRY, dounia.kotry@gmail.com  
14

15 29 **Mails:**

16  
17  
18 30 Justine SAILLARD: justine.saillard@chu-nantes.fr  
19

20 31 Marion BONSERGENT: marion.bonsergent@chu-nantes.fr  
21

22 32 Christelle VOLTEAU: christelle.volteau@chu-nantes.fr  
23

24 33 Antoine BENICHO: antoine.benichou@chu-nantes.fr  
25

26  
27 34 Sonia PROT-LABARTHE: sonia.protlabarthe@chu-nantes.fr  
28

29 35 Jean-François HUON: jeanfrancois.huon@chu-nantes.fr  
30  
31

32 36 **Abstract**

33  
34  
35  
36 37 **Objectives:** Today, the involvement of patients in their care is essential. As the population ages  
38  
39  
40 38 increases, the number of patients with chronic diseases is increasing. In the medical and  
41  
42  
43 39 vascular surgery departments, patients are polymedicated and mostly suffer from several  
44  
45  
46 40 chronic diseases. Approximately 50% of patients with a chronic disease are not adherent.  
47  
48  
49  
50 41 Among the factors that can influence therapeutic adherence are the beliefs and representations  
51  
52  
53 42 of patients. To evaluate the beliefs and representations of chronic treatments in patients with  
54  
55  
56 43 multiple medications and hospitalized in a vascular medicine and surgery department, and to  
57  
58  
59  
60

1  
2  
3  
4 44 evaluate the medication adherence, the knowledge, and the importance patients attach to their  
5  
6  
7 45 treatments.

8  
9  
10 46 **Design:** Observational, prospective and a single-center study.

11  
12  
13 47 **Setting:** The study was conducted in a French tertiary hospital center of around 3000 beds in 9  
14  
15  
16  
17 48 institutions.

18  
19  
20  
21 49 **Participants:** Adult polymedicated (i.e minimum of 5 chronic treatments) patients hospitalized  
22  
23  
24 50 in the surgical and vascular medicine department were included after application of the  
25  
26  
27 51 exclusion criteria.

28  
29  
30 52 **Methods:** Patient interviews were carried out in the department and were based on three  
31  
32  
33  
34 53 interviewer administered questionnaires (a global questionnaire, the Belief Medical  
35  
36  
37 54 Questionnaire (BMQ) and the GIRERD questionnaire).

38  
39  
40 55 **Results:** Our study showed that patients perceived their treatments as beneficial rather than  
41  
42  
43  
44 56 worrying. A correlation between medication adherence and beliefs was observed. "Non-  
45  
46  
47 57 adherent" patients had a more negative overall view of medication than "adherent" patients.  
48  
49  
50 58 The level of compliance and knowledge of our patients was low. Only 11% of the patients were  
51  
52  
53  
54 59 "good adherent", 16% of the patients could perfectly name their treatment and 36% knew all  
55  
56  
57 60 the indications.



1  
2  
3  
4 61 **Conclusion:** Knowledge of treatment representation and beliefs are central to understanding  
5  
6  
7 62 patient behaviour. Considering patients' representations will allow the identification of levers,  
8  
9  
10 63 and the development of actions and educational tools adapted to improve their adherence, their  
11  
12  
13 64 knowledge and therefore their drug management.

14  
15  
16  
17 65 Data availability statement: Data are available upon reasonable request  
18  
19  
20 66

## 21 22 23 24 67 **Strengths and limitations of this study**

- 25  
26  
27  
28 68 • This study aimed to explore the representation and beliefs of chronic treatments in  
29  
30  
31 69 patients with multiple medications in a vascular medicine and surgery department.
- 32  
33  
34  
35 70 • Study assessing the links between representations, beliefs, adherence medication and  
36  
37  
38 71 patients' knowledge of their chronic treatments.
- 39  
40  
41 72 • However, it is important to note that this is a single-center study, which may limit the  
42  
43  
44  
45 73 generalizability of the findings to other settings.
- 46  
47  
48  
49  
50  
51  
52  
53  
54  
55  
56  
57  
58  
59  
60

## 74 **Introduction**

75 According to the World Health Organization (WHO) (1), a chronic disease is a long-term  
76 condition that usually progresses slowly and requires long-term treatment and care. It is also  
77 characterized by its impact on the quality of life of patients. Twenty million French people are  
78 affected by a chronic disease (1). They represent 77% of all diseases, the most important of  
79 which are cardiovascular, cerebral, respiratory, metabolic and malignancies (2). Today, the  
80 prevalence of chronic diseases is rising sharply and can be explained by the aging of the  
81 population and the increase in life expectancy. They are therefore among the most common  
82 health care problems, with a major impact on public health and the economy (3).

83 In vascular medicine and surgery, the majority of patients have one or more chronic diseases  
84 and are polymedicated (4). Polymedication is defined as "the administration of many drugs  
85 simultaneously or the administration of an excessive number of drugs" (5,6). Furthermore, all  
86 chronic diseases require long-term management with an investment by both healthcare  
87 professionals and the patient. For this, a good level of information on the disease and treatments  
88 is necessary for the patient to avoid the risks of poor compliance. According to the WHO (7),  
89 50% of patients do not adhere to their chronic treatment, even though this adherence is essential  
90 for the control of the chronic disease. Indeed, loss of adherence to treatment leads to a decrease

1  
2  
3 91 in therapeutic efficacy and exposes the patient to complications of their disease and to  
4  
5  
6  
7 92 therapeutic failure (7).  
8  
9

10 93 The representations of treatments are factors that influence therapeutic adherence (8). This  
11  
12  
13 94 refers to each individual's knowledge, explanations and ideas about his disease.  
14  
15  
16 95 Representations are linked to the patient's behaviour, cultural, social and family background,  
17  
18  
19  
20 96 education, professional activity, etc. (9). They have multiple origins and varies from one  
21  
22  
23 97 individual to another. Today, the representation of the disease, but also of treatments, is central  
24  
25  
26  
27 98 to understanding the behaviour of patients in their health care journey. Representations and  
28  
29  
30 99 beliefs have been studied in certain chronic diseases, notably HIV, diabetes, hypertension,  
31  
32  
33 100 asthma, etc. (9-12).  
34  
35  
36

37 101 However, to our knowledge, they have not been studied in the medical and vascular surgery  
38  
39  
40 102 fields, when it comes to hospitalized patients with multiple medications.  
41  
42  
43

44 103 The main objective of this study was to evaluate the beliefs and representations of chronic  
45  
46  
47 104 treatments in multi-medicated patients hospitalized in surgery and vascular medicine. Secondly,  
48  
49  
50 105 the patients' knowledge of their treatments, the importance given by the patient to each of their  
51  
52  
53 106 treatment and the medication adherence were assessed.  
54  
55  
56  
57

## 58 107 **Material and methods**

59  
60

1  
2  
3  
4 108 This was an observational, prospective, single-center study conducted in a French tertiary  
5  
6  
7 109 hospital center of around 3000 beds in 9 institutions.  
8  
9

10 110 Patients included had to be over 18 years of age and hospitalized in the surgical and vascular  
11  
12  
13 111 medicine department, which comprises 28 beds. Patients had to be polymedicated prior the  
14  
15  
16  
17 112 hospitalization. Drawing on literature data (5) and the experience of our medication  
18  
19  
20 113 reconciliation activity, the threshold of five medications as a reference to designate  
21  
22  
23 114 polymedicated patients was established.  
24  
25

26  
27 115 Patients who were unable to participate in an interview because of cognitive impairment or  
28  
29  
30 116 language barrier were not included. All patients underwent a medication review on admission  
31  
32  
33  
34 117 to the vascular medicine and surgery department to obtain a complete record of their usual  
35  
36  
37 118 treatment. The patient inclusion period was from early March 2022 to late June 2022. All  
38  
39  
40 119 participants provided oral consent.  
41  
42

43  
44 120 The study was based on three questionnaires completed during the patient's hospitalization. All  
45  
46  
47 121 questionnaires were interviewer administered and concerned the treatments patients were  
48  
49  
50 122 taking prior to hospitalization.  
51  
52

53  
54 123  
55  
56  
57 124 1/ a global questionnaire regarding the patient's sociodemographic data, their usual treatments  
58  
59  
60 125 identified by the reconciliation and their medication management, the information received

1  
2  
3  
4 126 about his treatments, the knowledge he had of his treatments (name and indication) as well as  
5  
6  
7 127 the importance he gave to each medication (scored from 1 to 10).  
8  
9  
10 128 2/ the BMQ (Belief Medical Questionnaire). It allows for the evaluation of different specific  
11  
12  
13 129 dimensions of patients' beliefs about their medical treatments. It consists of 18 items divided  
14  
15  
16  
17 130 into two parts: specific beliefs (patients' representations of their medical prescriptions - 10  
18  
19  
20 131 items) and general beliefs (beliefs in medicine in general - 8 items). A 5-point Likert scale was  
21  
22  
23  
24 132 used for the responses. For each question, a total score was calculated by adding the item scores.  
25  
26  
27 133 Each specific belief could get a score between 5 and 25, and each general belief a score between  
28  
29  
30 134 4 and 20. The higher the scores, the more important the beliefs are. For specific beliefs, a  
31  
32  
33  
34 135 differential score is calculated by subtracting the specific concern from the specific need. A  
35  
36  
37 136 score greater than 0 means that the perceived need for treatment is greater than the concerns.  
38  
39  
40 137 The validated French version of this questionnaire was used (10).  
41  
42  
43  
44 138 3/ the validated GIRERD medication adherence questionnaire, composed of 6 items (13).  
45  
46  
47 139 GIRERD score: six negative ("no") responses: patient is "good adherent". Four or five "no"  
48  
49  
50 140 responses: patient is "low-adherent ". Two or three "no" responses: the patient is "non-  
51  
52  
53  
54 141 adherent".  
55  
56  
57 142 The interviews were conducted by the first author.  
58  
59  
60

1  
2  
3 143 Characteristics of the patients and the drugs were presented with mean, standard deviation,  
4  
5 144 minimum and maximum for the quantitative variable and with frequency and percentage of  
6  
7  
8 145 each category. Spearman's correlation coefficient were used to measure association between  
9  
10  
11 146 two continuous variables. Comparison of groups were performed using Chi-squared tests for  
12  
13  
14 147 categorical variables and using ANOVA, or Kruskal-Wallis tests for continuous variables,  
15  
16  
17  
18 148 depending of the normality of not of the distribution. The statistical significance was established  
19  
20  
21 149 with a threshold to 5%. All analyses were performed using SAS® version 9.4 software.

22  
23  
24  
25 150 This study was approved by the local ethics committee (Groupe Nantais d'Ethique dans le  
26  
27  
28 151 Domaine de la Santé) on June 22th 2022 (GNEDS 20220622).

29  
30  
31 152 Patient and Public Involvement: No patient involved  
32  
33  
34  
35

## 36 153 **Results**

### 37 154 **Characteristics of the patients and their treatments**

38  
39  
40 155 Over the period, three hundred sixty five patients underwent a medication reconciliation. Of the  
41  
42  
43 156 patients eligible and available at the time of service, one hundred patients were included in the  
44  
45  
46  
47  
48  
49 157 study. All patients completed the study and were analyzed. The characteristics of the patients  
50  
51  
52  
53 158 and their treatments are presented in *Supplemental Table 1*. Patients reported being treated for  
54  
55  
56 159 an estimated period of 19.4(± 12.4) years. On average, 9.4 (± 3.6) drugs were prescribed  
57  
58  
59 160 simultaneously, mostly for cardiovascular (32%), digestive (19.8%) or neurological (18%)

1  
2  
3  
4 161 diseases. The majority of patients were informed about their treatments by a doctor, but more  
5  
6  
7 162 than a quarter (27%) felt the need for more information.  
8  
9

10 163 Women felt that they received less information about drugs from healthcare professionals than  
11  
12  
13 164 men (48.4% vs. 71.0%,  $p = 0.0292$ ).  
15  
16

17 165  
18 166 **Beliefs**

21 167 The results of the BMQ questionnaire for the population are presented in *Figure 1* and the BMQ  
22  
23  
24  
25 168 score values are detailed in *Table 1*. Overall, patients said that their medication helped them not  
26  
27  
28 169 to feel worse, that without it they would be sicker or that their life would be impossible. They  
29  
30  
31  
32 170 were aware that their future life depended on taking them. However, almost one in three patients  
33  
34  
35 171 felt that doctors were too trusting of medication, and that they would prescribe less if they had  
36  
37  
38 172 more time. The BMQ scores clearly show that the balance of benefits and risks perceived by  
39  
40  
41  
42 173 the patients is clearly in favor of taking the treatments for 96% of them.  
43  
44

45 174 The more medications patients took, the more they believed in the importance of their treatment  
46  
47  
48 175 ( $r = 0.27$ ,  $p = 0.0064$ ). Women believed more in the harm of treatments ( $p = 0.0352$ ) and in the  
49  
50  
51  
52 176 overuse of drugs than men ( $p = 0.0170$ )  
53  
54

55 177  
56  
57  
58 178 **Compliance**  
59  
60

1  
2  
3  
4 179 The responses to the GIRERD questionnaire are presented in *Table 2*. Only 11% of patients had  
5  
6  
7 180 good medication adherence with their treatments according to the questionnaire score. One in  
8  
9  
10 181 10 was considered totally non-adherent.

11  
12  
13 182 The more a good medication adherence patients have, the more they believed in the importance  
14  
15  
16  
17 183 of their medication ( $p = 0.0039$ ).

18  
19  
20 184 No significant association was found between the level of medication adherence and age ( $p =$   
21  
22  
23 185 0.50), level of education ( $p = 0.52$ ) or number of medications ( $p = 0.0733$ ).

24  
25  
26  
27 186

### 28 29 187 **Knowledge**

30  
31  
32  
33 188 On average, patients were able to name 49.3% of their treatments. Sixteen percent of patients  
34  
35  
36 189 could name all of their treatments, while 11% of patients could not name any of their treatments.

37  
38  
39 190 On average, patients knew 73.1% of the indications for all their usual treatments. When 32  
40  
41  
42  
43 191 patients were able to name all the indications of their medication, 3 patients could not name  
44  
45  
46 192 any.

47  
48  
49 193 Several correlations were found, notably between age and patient knowledge (*Supplemental*  
50  
51  
52 194 *Table 2*), but also with educational level. Indeed, patients with higher education knew more  
53  
54  
55  
56 195 about the indications of their treatments (mean= 85.1±22.8) than patients with no education  
57  
58  
59 196 (mean= 40.9±29.4) ( $p = 0.0017$ ).



1  
2  
3  
4 197 The least cited drug classes were anti-histamines for systemic use (28.6%), analgesics (26.8%),  
5  
6  
7 198 anti-anemic preparations (24.0%) and ophthalmic drugs (20%).  
8  
9

10 199 Among the most prescribed drug classes, the most cited were anti-thrombotics (64.7% of the  
11  
12  
13 200 116 prescriptions), beta-blockers (55.9% of the 59 prescriptions), drugs acting on the renin  
14  
15  
16  
17 201 angiotensin system (49.3% of 67 the prescriptions) and anti-diabetics (46.8% of the 62  
18  
19  
20 202 prescriptions).  
21  
22

23 203 The drug classes for which patients demonstrated inadequate knowledge regarding their  
24  
25  
26  
27 204 indications primarily included cardiology drugs (60%), anti-anemic preparations (48%),  
28  
29  
30 205 diuretics (47.5%), beta-blockers (45.8%) and lipid-lowering drugs (45%).  
31  
32

33 206 When patients were asked about their treatments, a large proportion did not spontaneously  
34  
35  
36  
37 207 mention the drugs they took "if needed", in particular analgesics (26,8% of the 82 prescriptions)  
38  
39  
40 208 such as paracetamol or symptomatic drugs such as antihistamines (28,7% of the 14  
41  
42  
43 209 prescriptions).  
44  
45

46  
47 210 A comparison between beliefs, compliance and knowledge was made. The results obtained are  
48  
49  
50 211 detailed in *Table 3*. For patients with low adherence, the more they knew the indications of their  
51  
52  
53 212 treatments, the less they feared their harmfulness. And the more they knew how to name  
54  
55  
56  
57 213 treatments, the less they feared overuse.  
58  
59

60 214

## 215 **Importance ratings**

216 Fourteen patients were unable to rate the importance of their treatment because they felt that all  
217 their medications were equally important.

218 Out of the most prescribed drug classes, two had a median importance score of less than 6:  
219 nasal preparations (3 prescriptions, median score 5.0) and constipation medications (13  
220 prescriptions, median score 5.5). Those with the highest importance scores were antidiabetics  
221 (62 prescriptions, median score 9.5), immunosuppressants (10 prescriptions, median score 10),  
222 and antithrombotics (116 prescriptions, median score 9).

223 Symptomatic medications scored high in importance. Analgesics (82 prescriptions),  
224 antihistamines (14 prescriptions), and medications for acid-related disorders (52 prescriptions)  
225 all received a median score of 8.

226 There was no significant correlation between median patient ratings and compliance ( $r = -0.13$ ,  
227  $p = 0.3623$ ).

## 228 **Discussion**

229 Our study showed that patients perceived their treatments as beneficial rather than worrying. A  
230 correlation between medication adherence and beliefs was observed. "Non-adherent" patients

1  
2  
3  
4 231 had a more negative overall perception of medication compared to "adherent patients". The  
5  
6  
7 232 level of medication adherence and knowledge of our patients was low. Only 11% of the patients  
8  
9  
10 233 had "good medication adherence", 16% of the patients could perfectly name their treatment and  
11  
12  
13 234 36% knew all the indications.  
14  
15  
16  
17 235 In recent years, several studies have assessed treatment representations and their influence on  
18  
19  
20 236 medication adherence. However, to our knowledge, this study is the first to examine patients'  
21  
22  
23 237 beliefs about their chronic treatment in relation to their knowledge and medication adherence  
24  
25  
26  
27 238 in a vascular medicine and surgery department.  
28  
29  
30 239 Our results regarding the importance attributed by patients to their chronic medication are  
31  
32  
33 240 consistent with the data found in the literature. French studies have evaluated the representation  
34  
35  
36  
37 241 of treatments in chronic pathologies, particularly in asthma (12), diabetes and HIV (10), and  
38  
39  
40 242 bronchopulmonary cancer (14). All these studies have highlighted the importance that patients  
41  
42  
43  
44 243 attach to their medication. Therefore, patients perceive their treatment as beneficial rather than  
45  
46  
47 244 worrisome. Indeed, in our study, 77% of patients were not worried about taking medication and  
48  
49  
50 245 76% were not disturbed by medication in their daily lives.  
51  
52  
53  
54 246 Several studies have demonstrated a correlation between patients' representations of their  
55  
56  
57 247 treatment and the level of medication adherence. Horne *et al.* established this link for each of  
58  
59  
60 248 the chronic pathologies studied via the BMQ questionnaire in a cohort of 324 patients with

1  
2  
3  
4 249 diverse chronic diseases (asthma, oncology, cardiac and renal diseases). Indeed, the "necessity"  
5  
6  
7 250 score was correlated with good medication adherence and the "concern" score was related to  
8  
9  
10 251 poor medication adherence in each of the diseases studied (11). Although our results could not  
11  
12  
13 252 show a significant correlation but a trend towards the same result. Conducting disease-specific  
14  
15  
16  
17 253 analyses with larger sample sizes could confirm this trend.

18  
19  
20 254 A French study also explored correlations between beliefs and medication adherence among  
21  
22  
23 255 patients with chronic diseases in general medical practices (15). Of the 265 patients included in  
24  
25  
26  
27 256 the study, 40.8% had good medication adherence, 53.2% were "moderately adherent" and 6%  
28  
29  
30 257 were "non-adherent". In our study, only 11% of patients were "good adherent". This can be  
31  
32  
33 258 partially explained by a significant difference in the average number of medications taken by  
34  
35  
36  
37 259 patients. In their study, patients had an average of  $3.6 \pm 2.6$  medications, almost three times less  
38  
39  
40 260 than in our study. One of the 6 questions of the GIRERD questionnaire related to the amount  
41  
42  
43 261 of medication to be taken: "Do you think you have too many pills to take" and 67% of our  
44  
45  
46  
47 262 patients answered "yes". This may explain the low rate of "good adherent".

48  
49  
50 263 Deat *et al.* highlighted a significant correlation between the degree of adherence and the BMQ  
51  
52  
53 264 scores "concerns", "harmfulness" and "overuse", supporting the trend shown in our study. The  
54  
55  
56  
57 265 absence of a statistical significance could be explained by an important difference in the number  
58  
59  
60 266 of patients in each compliant group. Only ten patients were "non-adherent". Regarding the

1  
2  
3  
4 267 concerns of "non-adherent" patients, our results are consistent with their study: patients were  
5  
6  
7 268 more concerned with their treatment, which may have an impact on medication adherence.  
8  
9  
10 269 Fall *et al.* conducted a study among diabetic and HIV patients (10). A disease-specific analysis  
11  
12  
13 270 demonstrated significant correlations between medication adherence and the necessity and  
14  
15  
16  
17 271 worry scales. Thus, negative beliefs were predictive of poor adherence. "Non-adherent"  
18  
19  
20 272 patients would therefore have a more negative overall view of medication than adherent  
21  
22  
23 273 patients.  
24  
25  
26  
27 274 According to the study by Huon *et al.* (16), the average number of medications taken by the  
28  
29  
30 275 elderly is 8 in the 70–80-year-olds, 9.61 in the 80–90-year-olds, 9.92 in the 90–100-year-olds  
31  
32  
33  
34 276 and 8.11 for the over 100-year-olds. Overall, the increase in medication use varies as the  
35  
36  
37 277 population ages. Our patients, with an average age of 70.8 years, took an average of 9.7  
38  
39  
40 278 medications. Unfortunately, the higher the number of medications, the higher the risk of  
41  
42  
43  
44 279 forgetting or not taking the treatments (17). This high number of medications also has a role in  
45  
46  
47 280 patients' knowledge and beliefs. Our results demonstrated that the more medications patients  
48  
49  
50 281 took, the less they knew about their names and indications. These results are consistent with  
51  
52  
53  
54 282 those reported in the literature (18).  
55  
56  
57 283 One study showed that knowledge of drug indications varied based on the ATC class. Indeed,  
58  
59  
60 284 the drug classes where indications were not known included cardiovascular drugs (12%),

1  
2  
3  
4 285 asthma drugs (5%) and estrogen therapies (5%) (19). In our study, we also noted that indications  
5  
6  
7 286 for cardiovascular drugs were the least known. This observation aligns with the fact that patients  
8  
9  
10 287 in the vascular medicine department have many cardiology medications. It is therefore essential  
11  
12  
13 288 that caregivers take sufficient time with patients to educate and involve them in their care.  
14  
15  
16 289 Persall *et al.* (19) also revealed that the older and less educated the patients were, the less they  
17  
18  
19  
20 290 knew about their treatments. Our results support these findings.  
21  
22  
23 291 Only 16% of patients could perfectly name their treatment and 36% knew all the indications.  
24  
25  
26 292 In general, the level of knowledge of patients about their treatment was low. However,  
27  
28  
29  
30 293 comparing our results to existing literature is challenging due to disparities in the number of  
31  
32  
33 294 drugs per patient and the number of patients included. Akici *et al.* (20) showed, in a study  
34  
35  
36 295 including 1618 patients with an average of 3.3 drugs per patient, that only 10.9% of patients  
37  
38  
39  
40 296 could correctly name their treatment. Given the average number of medications taken by the  
41  
42  
43 297 patients in our study, over 9, it seems normal that the number of patients who could cite their  
44  
45  
46 298 entire treatment is low in our results. The study by Haidar-Ahmad *et al.* including 351 patients,  
47  
48  
49  
50 299 with a mean number of medications taken of 3.83, described that 80.74% of the medications  
51  
52  
53 300 were known by the patients (21). Persall *et al.*, included 616 patients in their study. Only 13.5%  
54  
55  
56 301 of patients did not know any of the indications. They also noted a significant lack of knowledge  
57  
58  
59  
60 302 of their patients for cardiovascular medications (19).

1  
2  
3  
4 303 Although patient knowledge levels and medication adherence were low, the importance they  
5  
6  
7 304 attached to their treatment was high. Patient ratings indicated that the majority of prescribed  
8  
9  
10 305 drug classes were considered important to them. Only four ATC classes scored below average.  
11  
12  
13 306 This outcome confirms the "necessity" score obtained in the BMQ questionnaire. A French  
14  
15  
16  
17 307 study assessed drug-related representations in patients with multiple myeloma (22). The authors  
18  
19  
20 308 estimated the importance the patient placed on his or her medications. Antithrombotic drugs,  
21  
22  
23 309 unlike our study, were rated lower, whereas anticancer drugs scored highest. This significant  
24  
25  
26  
27 310 difference between medications that are all part of the overall management of myeloma could  
28  
29  
30 311 be explained by the degree of information provided to patients. Indeed, while the direct link  
31  
32  
33 312 between anticancer drugs and myeloma can easily be made, the link between antithrombotic  
34  
35  
36  
37 313 drugs and the fatal consequences of myeloma is less intuitive. Our work reports on patients with  
38  
39  
40 314 multiple and varied chronic pathologies, with a large number of prescribed medications.  
41  
42  
43  
44 315 Despite this, few differences were observed between ATC classes and therefore chronic  
45  
46  
47 316 pathologies. For a majority of patients, all treatments carried equivalent importance. Indeed,  
48  
49  
50 317 even if the patients did not spontaneously cite their symptomatic treatments, they gave them a  
51  
52  
53  
54 318 high importance. This is due to the perceived immediate effect of using these treatments. This  
55  
56  
57 319 finding is in alignment with another study (23) which demonstrated that patients exhibited  
58  
59  
60 320 greater familiarity with analgesics compared to cardiovascular drugs, as they could directly

1  
2  
3  
4 321 sense their effects. Notably, in our study, patients were very familiar with the effects of their  
5  
6  
7 322 symptomatic medications but did not cite them directly. This individual perception of treatment  
8  
9  
10 323 efficacy has been described as a determining factor in patient adherence to medication (24).

11  
12  
13 324 Moreover, if representations about treatments impact patient adherence, adherence is also  
14  
15  
16  
17 325 determined by the relationship of trust with the physician. Several studies have shown that the  
18  
19  
20 326 relationship between the physician and the patient has a significant impact on the feeling of  
21  
22  
23  
24 327 usefulness and efficacy of the treatment, but also on adherence (25). Research has indicated  
25  
26  
27 328 that patients exhibit improved medication adherence when they possess sufficient information  
28  
29  
30 329 and a clear understanding of the rationale behind their treatment (26). As described by Peh et  
31  
32  
33  
34 330 al. in their study, various factors contribute to therapeutic adherence, include healthcare  
35  
36  
37 331 professionals. For them, medication adherence depends on patients' perceived needs and beliefs  
38  
39  
40 332 about medication, which are, in turn, influenced by the information and advice provided by the  
41  
42  
43  
44 333 healthcare provider during the medical consultation (27). In our study, the majority of patients  
45  
46  
47 334 reported receiving information about their treatment, but one third felt that this was not  
48  
49  
50 335 sufficient.

51  
52  
53  
54 336 In our study, we were interested in the link between beliefs and adherence. Nevertheless,  
55  
56  
57 337 therapeutic adherence represents a multifaceted behavior shaped by a multitude of factors;  
58  
59  
60 338 factors linked to the patient (age for example, beliefs), to the care team (information), to the



1  
2  
3  
4 339 disease (asymptomatic or symptomatic), to the treatment (undesirable effects or not), and to  
5  
6  
7 340 social and economic factors (24,27). With enhanced information, efficacious, and secure for  
8  
9  
10 341 their well-being. Consequently, this perception aids in optimizing their medication-taking  
11  
12  
13 342 behavior over an extended period (24).

14  
15  
16 343 Assessing patients' beliefs would allow us to better target their priorities, and thus to develop  
17  
18  
19 344 adapted educational actions and tools. Indeed, understanding the mechanisms and potential  
20  
21  
22 345 evolution of the disease will make it easier for patients to assimilate the objectives of their  
23  
24  
25 346 treatments and will facilitate their therapeutic adherence (28).

26  
27  
28  
29  
30 347

31  
32 348

33  
34 349

### 35 350 **Strengths and biases**

36  
37  
38 351 To our knowledge, the representation and beliefs of chronic treatments have not been studied  
39  
40  
41  
42  
43 352 in a vascular medicine and surgery department, in patients with multiple medications and  
44  
45  
46 353 cardiac pathologies. This is a single-center study. It would be of interest to replicate this  
47  
48  
49 354 investigation across multiple centers to achieve outcomes that are both generalizable and  
50  
51  
52 355 transferable.

53  
54  
55 356 In our study, the BMQ was used for a combination of several diseases, whereas its French  
56  
57  
58 357 version has only been validated for diabetes and HIV (10). Thus, patients with several chronic  
59  
60

1  
2  
3  
4 358 diseases may not have the same representations regarding the treatments for each disease. The  
5  
6  
7 359 scores given by patients on each of their treatments were used to estimate the level of  
8  
9  
10 360 importance given to each medication. Notably, a predominant observation was that for the  
11  
12  
13 361 majority of patients, all their prescribed medications were perceived as equally significant,  
14  
15  
16  
17 362 potentially indicating an absence of prioritization.

18  
19  
20 363 Another limitation inherent in our study pertains to the exclusive utilization of a questionnaire  
21  
22  
23 364 to assess adherence, despite the availability of various adherence measurement methods (both  
24  
25  
26  
27 365 direct and indirect). While the questionnaire presents a straightforward, swift, and cost-effective  
28  
29  
30 366 technique, its stand-alone use is less robust. Many authors recommend using at least two  
31  
32  
33 367 methods. In addition, the use of questionnaires tends to overestimate medication adherence (29)  
34  
35  
36  
37 368 which may seem worrying in view of the already low adherence reported in our results. In the  
38  
39  
40 369 context of short-stay inpatients, it was not possible to use direct methods (drug measurements,  
41  
42  
43 370 biological marker measurements), or to use any other indirect method than the questionnaire.  
44  
45  
46  
47 371 Moreover, this would have lengthened the interview time with the patients and thus made the  
48  
49  
50 372 procedure more cumbersome.

51  
52  
53 373 Concerning the evaluation of knowledge, the hospitalization of our population certainly had an  
54  
55  
56  
57 374 impact on the real knowledge of the patients about their treatment. In discussion with the  
58  
59  
60 375 doctors, we reached this limit in our study. Being in a stressful environment, in a context of

1  
2  
3  
4 376 acute pathology, could potentially have decreased their true knowledge of the names and  
5  
6  
7 377 indications of their treatment, inducing a bias.  
8  
9

10 378 One of the exclusion criteria for the study was cognitive impairment. This was assessed  
11  
12  
13 379 clinically but was not confirmed by a specific assessment test such as Mini Mental State  
14  
15  
16  
17 380 Examination (MMSE). This would have again made the protocol and interviews more  
18  
19  
20 381 cumbersome.  
21  
22  
23  
24

## 25 382 **Conclusion**

26  
27  
28  
29  
30

31 383 The level of knowledge and medication adherence of patients with multiple chronic diseases in  
32  
33  
34 384 surgery and vascular medicine is low. Representations of the disease and of medication have  
35  
36  
37 385 an impact on patients' behaviour. They are determinants of adherence to medication. Identifying  
38  
39  
40  
41 386 patients' beliefs about their chronic treatment allows caregivers to adapt information to patients'  
42  
43  
44 387 needs. Better information from healthcare professionals (physician, nurse, pharmacist, etc.)  
45  
46  
47 388 regarding the indication and efficacy of the prescribed treatment is essential. Combined with  
48  
49  
50  
51 389 the consideration of patients' concerns, particularly regarding tolerance, this will improve the  
52  
53  
54 390 benefit/concern ratio perceived by these patients, and thus increase their compliance. The BMQ  
55  
56  
57 391 may help to identify patients at risk of poor compliance.  
58  
59  
60

1  
2  
3  
4 392  
5  
6  
7 393  
8  
9  
10 394  
11  
12  
13  
14  
15  
16  
17  
18  
19  
20  
21  
22  
23  
24  
25  
26  
27  
28  
29  
30  
31  
32  
33  
34  
35  
36  
37  
38  
39  
40  
41  
42  
43  
44  
45  
46  
47  
48  
49  
50  
51  
52  
53  
54  
55  
56  
57  
58  
59  
60

For peer review only

1  
2  
3  
4 395 **Acknowledgments**  
5  
6  
7

8 396 The authors would like to thank all the staff members of the medicine and vascular surgery for  
9  
10  
11 397 their kind help in performing this study.  
12  
13

14 398  
15  
16

17  
18 399 **Contributors:**  
19  
20

21  
22 400 DK, JS, MB, SPL and JFH contributed to the study conception and design. Data collection and  
23  
24  
25 401 analysis were performed by CV and DK. The first draft of the manuscript was written by DK  
26  
27  
28 402 and JS, MB, AB, SPL, CV and JFH commented on previous versions of the manuscript. All  
29  
30  
31  
32 403 authors read and approved the final manuscript.  
33  
34

35 404  
36  
37  
38

39 405 **Competing interests**  
40  
41

42  
43 406 The Author(s) declare(s) that there is no conflict of interest.  
44  
45

46 407  
47

48 408 **Funding**  
49  
50

51  
52 409 No funding was obtained for this study.  
53  
54

55 410  
56  
57  
58  
59  
60

1  
2  
3  
4 411 **Data sharing statement**  
5  
6

7 412 The data underlying this article will be shared on reasonable request to the corresponding  
8  
9 413 author.  
10  
11  
12  
13  
14  
15  
16  
17  
18  
19  
20  
21  
22  
23  
24  
25  
26  
27  
28  
29  
30  
31  
32  
33  
34  
35  
36  
37  
38  
39  
40  
41  
42  
43  
44  
45  
46  
47  
48  
49  
50  
51  
52  
53  
54  
55  
56  
57  
58  
59  
60

For peer review only

## 414 Bibliography

- 415 1. Chassang M, Gautier A. Les maladies chroniques [online]. 2019.  
416 [https://www.lecese.fr/sites/default/files/pdf/Avis/2019/2019\\_14\\_maladies\\_chroniques.pdf](https://www.lecese.fr/sites/default/files/pdf/Avis/2019/2019_14_maladies_chroniques.pdf)  
417 (accessed 21 Januar 2022).
- 418 2. WHO Chronic disease report [online].  
419 [https://www.who.int/chp/chronic\\_disease\\_report/media/information/factsheets\\_FR\\_web.pdf](https://www.who.int/chp/chronic_disease_report/media/information/factsheets_FR_web.pdf)  
420 (accessed 21 Januar 2022).
- 421 3. Briançon S, Guérin G, Sandrin-Berthon B. Maladie chroniques [online]. 2010. 2010-  
422 09-adsp-n°72-maladies-chroniques-et-ETP.pdf. (accessed 21 Januar 2022)
- 423 4. Laroche JP, Guilbert B, Miserey G, et al. Conseil National Professionnel de Médecine  
424 Vasculaire, Médecine Vasculaire - Etat des lieux. [online]. 2015.  
425 [https://www.portailvasculaire.fr/sites/default/files/docs/livre\\_blanc\\_2015.pdf](https://www.portailvasculaire.fr/sites/default/files/docs/livre_blanc_2015.pdf) (accessed 26  
426 July 2022)
- 427 5. Monégat M, Sermet C, Perronnin M, et al. La polymédication définitions mesures et  
428 enjeux [online]. 2014. [https://www.irdes.fr/recherche/questions-d-economie-de-la-sante/204-](https://www.irdes.fr/recherche/questions-d-economie-de-la-sante/204-la-polymedication-definitions-mesures-et-enjeux.pdf)  
429 [la-polymedication-definitions-mesures-et-enjeux.pdf](https://www.irdes.fr/recherche/questions-d-economie-de-la-sante/204-la-polymedication-definitions-mesures-et-enjeux.pdf) (accessed 3 Januar 2022)

- 1  
2  
3  
4 430 6. Le Cossec C. La polymédication au regard de différents indicateurs de sa mesure: impact  
5  
6  
7 431 sur la prévalence, les classes thérapeutiques concernées et les facteurs associés. [online]. 2015.  
8  
9  
10 432 <https://www.irdes.fr/recherche/rapports/562-la-polymedication-au-regard-de-differents->  
11  
12  
13 433 [indicateurs-de-sa-mesure.pdf](https://www.irdes.fr/recherche/rapports/562-la-polymedication-au-regard-de-differents-indicateurs-de-sa-mesure.pdf) (accessed 3 Januar 2022)  
14  
15  
16  
17 434 7. Schneider MP, Herzig L, Hugentobler Hampai D, et al. Revue Medicale Suisse.  
18  
19  
20 435 Adhésion thérapeutique du patient chronique : des concepts à la prise en charge ambulatoire  
21  
22  
23 436 [online]. 2013. [https://www.revmed.ch/revue-medicale-suisse/2013/revue-medicale-suisse-](https://www.revmed.ch/revue-medicale-suisse/2013/revue-medicale-suisse-386/adhesion-therapeutique-du-patient-chronique-des-concepts-a-la-prise-en-charge-)  
24  
25  
26  
27 437 [386/adhesion-therapeutique-du-patient-chronique-des-concepts-a-la-prise-en-charge-](https://www.revmed.ch/revue-medicale-suisse/2013/revue-medicale-suisse-386/adhesion-therapeutique-du-patient-chronique-des-concepts-a-la-prise-en-charge-)  
28  
29  
30 438 [ambulatoire](https://www.revmed.ch/revue-medicale-suisse/2013/revue-medicale-suisse-386/adhesion-therapeutique-du-patient-chronique-des-concepts-a-la-prise-en-charge-) (accessed 3 Januar 2022)  
31  
32  
33  
34 439 8. Turrise S. Illness Representations, Treatment Beliefs, Medication Adherence, and 30-  
35  
36  
37 440 Day Hospital Readmission in Adults With Chronic Heart Failure: A Prospective Correlational  
38  
39  
40 441 Study. J Cardiovasc Nurs. 2016;31(3):245-54. doi: 10.1097/JCN.0000000000000249  
41  
42  
43  
44 442 9. Horne R, Weinman J, Hankins M. The beliefs about medicines questionnaire: The  
45  
46  
47 443 development and evaluation of a new method for assessing the cognitive representation of  
48  
49  
50 444 medication. Psychol Health. 1999;14(1):1-24. doi: 10.1080/08870449908407311  
51  
52  
53  
54 445 10. Masson E. EM-Consulte. Validation of the French version of the Beliefs about  
55  
56  
57 446 Medicines Questionnaire (BMQ) among diabetes and HIV patients [online]. 2014.  
58  
59  
60



- 1  
2  
3  
4 447 <https://www.em-consulte.com/article/934270/validation-of-the-french-version-of-the-beliefs->  
5  
6  
7 448 ab (accessed 3 Januar 2022)  
8  
9  
10 449 11. Horne R, Weinman J. Patients' beliefs about prescribed medicines and their role in  
11  
12  
13 450 adherence to treatment in chronic physical illness. *J Psychosom Res.* 1999;47(6):555-67. doi:  
14  
15  
16 451 10.1016/S0022-3999(99)00057-4  
17  
18  
19  
20 452 12. Charles C, Ninot G, Sultan S. Représentations des patients et observance des traitements  
21  
22  
23 453 par corticostéroïdes inhalés dans l'asthme. Revue systématique sur la période 1999–2009. *Rev*  
24  
25  
26 454 *Mal Respir.* 2011;28(5):626-35. doi: 10.1016/j.rmr.2010.11.003  
27  
28  
29  
30 455 13. Girerd X, Hanon O, Anagnostopoulos K, et al. Assessment of antihypertensive  
31  
32  
33 456 compliance using a self-administered questionnaire: development and use in a hypertension  
34  
35  
36 457 clinic. *Presse Medicale Paris Fr* 1983. 2001;30(21):1044-8.  
37  
38  
39  
40 458 14. Torrecillas S, Perrot E, Gérinière L, et al. Croyances des patients envers les thérapies  
41  
42  
43 459 ciblées orales et leur influence sur l'observance dans le cancer broncho-pulmonaire : une étude  
44  
45  
46 460 pilote prospective. *Rev Pneumol Clin.* 2016;72(1):25-34. doi: 10.1016/j.pneumo.2015.03.005  
47  
48  
49  
50 461 15. Déat et al. Croyances à propos des médicaments et observance chez les patients atteints  
51  
52  
53 462 de maladie chronique. *Exerc Rev Francoph Médecine Générale.* 28(138):436.  
54  
55  
56  
57  
58  
59  
60

- 1  
2  
3  
4 463 16. Huon JF, Lenain E, LeGuen J, et al. How Drug Use by French Elderly Patients Has  
5  
6  
7 464 Changed During the Last Decade. *Drugs - Real World Outcomes*. 2015;2(4):327-33. doi:  
8  
9  
10 465 10.1007/s40801-015-0041-6  
11  
12  
13 466 17. Bruyer B. Évaluation des connaissances que les patients ont de leurs traitements et du  
14  
15  
16  
17 467 temps d'éducation thérapeutique en consultation de médecine générale ou en pharmacie.  
18  
19  
20 468 *Médecine humaine et pathologie*. 2020. ffdumas-03054136f  
21  
22  
23 469 18. Chung MK, Bartfield JM. Knowledge of prescription medications among elderly  
24  
25  
26 470 emergency department patients. *Ann Emerg Med*. 2002;39(6):605-8. doi:  
27  
28  
29 471 10.1067/mem.2002.122853  
30  
31  
32 472 19. Persell SD, Heiman HL, Weingart SN, et al. Understanding of drug indications by  
33  
34  
35  
36 473 ambulatory care patients. *Am J Health Syst Pharm*. 2004;61(23):2523-7. doi:  
37  
38  
39 474 10.1093/ajhp/61.23.2523  
40  
41  
42 475 20. Akici A, Kalaça S, Uğurlu MU, et al. Patient knowledge about drugs prescribed at  
43  
44  
45  
46 476 primary healthcare facilities. *Pharmacoepidemiol Drug Saf*. 2004;13(12):871-6. doi:  
47  
48  
49 477 10.1002/pds.1020  
50  
51  
52 478 21. Haidar-Ahmad F. Les facteurs influençant la connaissance du traitement chronique :  
53  
54  
55  
56 479 étude menée sur 351 patients dans les 14ème, 15ème et 16ème arrondissements de Marseille.  
57  
58  
59 480 *Sciences du Vivant [q-bio]*. 2019. ffdumas-02274110f  
60

- 1  
2  
3  
4 481 22. Huon JF, Fronteau C, Caffin AG, et al. Évaluation des représentations relatives aux  
5  
6  
7 482 médicaments chez les patients atteints de myélome multiple. *Educ Thérapeutique Patient - Ther*  
8  
9  
10 483 *Patient Educ. EDP Sciences*; 2017;9(1):10101. doi: 10.1051/tpe/2017002  
11  
12  
13 484 23. Oudjhani M, Foison O, Astier A. Est-ce que les sujets âgés connaissent leurs  
14  
15  
16 485 traitements ? *J Pharm Clin.* 2012;31(2):113-6. doi: 10.1684/jpc.2012.0215  
17  
18  
19  
20 486 24. Johnson MJ. The Medication Adherence Model: a guide for assessing medication taking.  
21  
22  
23 487 *Research and theory for nursing practice*, 16(3), 179–192. 2002.  
24  
25 488 <https://doi.org/10.1891/rtnp.16.3.179.53008>  
26  
27  
28 489 25. Fuertes JN, Mislowack A, Bennett J, et al. The physician–patient working alliance.  
29  
30  
31 490 *Patient Educ Couns.* 2007;66(1):29-36. doi: 10.1016/j.pec.2006.09.013  
32  
33  
34  
35 491 26. Monnier G, Charpiat B, Serratrice F, et al. Evaluation de l’apport d’une consultation de  
36  
37  
38 492 pharmacie sur les connaissances des patients transplantés hépatiques. *Thérapies.*  
39  
40  
41 493 2003;58(4):305-11. doi: 10.2515/therapie:2003047  
42  
43  
44  
45 494 27. Peh, K.Q.E., Kwan, et al. An Adaptable Framework for Factors Contributing to  
46  
47  
48 495 Medication Adherence: Results from a Systematic Review of 102 Conceptual Frameworks. *J*  
49  
50  
51 496 *GEN INTERN MED* 36,

- 1  
2  
3  
4 497 28. Kelly M, McCarthy S, Sahm LJ. Knowledge, attitudes and beliefs of patients and carers  
5  
6  
7 498 regarding medication adherence: a review of qualitative literature. *Eur J Clin Pharmacol.*  
8  
9  
10 499 2014;70(12):1423-31. doi: 10.1007/s00228-014-1761-3  
11  
12  
13 500 29. Allenet B, Baudrant M, Lehmann A, et al. Comment évaluer l'adhésion  
14  
15  
16 501 médicamenteuse? Le point sur les méthodes. *Ann Pharm Fr.* 2013;71(2):135-41. doi:  
17  
18  
19  
20 502 10.1016/j.pharma.2012.10.001  
21  
22

23  
24 503  
25  
26  
27  
28  
29  
30  
31  
32  
33  
34  
35  
36  
37  
38  
39  
40  
41  
42  
43  
44  
45  
46  
47  
48  
49  
50  
51  
52  
53  
54  
55  
56  
57  
58  
59  
60

1  
2  
3  
4  
5  
6  
7  
8  
9  
10  
11  
12  
13  
14  
15  
16  
17  
18  
19  
20  
21  
22  
23  
24  
25  
26  
27  
28  
29  
30  
31  
32  
33  
34  
35  
36  
37  
38  
39  
40  
41  
42  
43  
44  
45  
46  
47  
48  
49  
50  
51  
52  
53  
54  
55  
56  
57  
58  
59  
60

504 **Legends**

505 **Figure 1:** Responses to the BMQ questionnaire (percentage of responses among the 100  
506 patients)

For peer review only

507 **Tables**508 **Table 1. BMQ score results - Beliefs**

| BMQ* - Beliefs                   | N = 100             | Male<br>N = 69 | Female<br>N = 31 | p-value       |
|----------------------------------|---------------------|----------------|------------------|---------------|
| Specific Beliefs - Necessity     | 21.9±3.5 [8.0;25.0] | 21.7±3.6       | 22.2±3.1         | 0,4822        |
| Specific Beliefs - Concerns      | 11.1±4.8 [5.0;23.0] | 10.5±4.4       | 12.5±5.5         | 0.0509        |
| General Beliefs - Harm           | 9.1±3.2 [4.0;17.0]  | 8.6±3.0        | 10.1±3.5         | <b>0.0352</b> |
| General Beliefs - Overuse        | 10.3±3.4 [4.0;17.0] | 9.8±3.4        | 11.5±3.3         | <b>0.0170</b> |
| BMQ Necessity - BMQ Concern > 0† | 96 (96.0%)          | 66 (95.7%)     | 30 (96.0%)       | 1.0000        |

509 Results are presented as mean ± standard deviation [minimum-maximum] or frequencies and percentages

510 Specific belief scores range from 5 to 25 and general belief scores range from 4 to 20. A high score indicates a  
511 strong belief.

512 \*BMQ: Belief Medical Questionnaire

513 †BMQ "necessity" - BMQ "concern" > 0 means that the beneficial character is superior to the worrying character.

514 **Table 2. Responses to the GIRERD questionnaire and correlations between compliance and**  
 515 **beliefs (N=100)**

| Questions and number of positive responses                                                                                |                 |                  |                  | N (%)         |
|---------------------------------------------------------------------------------------------------------------------------|-----------------|------------------|------------------|---------------|
| Did you forget to take your medication this morning?                                                                      |                 |                  |                  | 1 (1.0%)      |
| Since your last visit, have you run out of medication?                                                                    |                 |                  |                  | 7 (7.0%)      |
| Have you ever taken your medication late compared to the usual time?                                                      |                 |                  |                  | 43 (43.0%)    |
| Have you ever not taken your medication because your memory fails you some days?                                          |                 |                  |                  | 23 (23.0%)    |
| Have you ever not taken your medication because some days you feel that your medication is doing you more harm than good? |                 |                  |                  | 9 (9.0%)      |
| Do you think you have too many pills to take?                                                                             |                 |                  |                  | 61 (61.0%)    |
|                                                                                                                           | Good adherent   | Low adherent     | Non-adherent     | p-value       |
|                                                                                                                           | N = 11 (11.0%)  | N = 79 (79.0%)   | N = 10 (10.0%)   |               |
| Specific Beliefs - Necessity                                                                                              | 21.0 [6.0;12]   | 23.0 [21.0;25.0] | 23.0 [16.0;24.0] | 0.6487        |
| Specific Beliefs - Concerns                                                                                               | 9.0 [6.0;12.0]  | 11.0 [6.0;14.0]  | 17.0 [9.0;20.0]  | 0.1163        |
| BMQ Necessity - BMQ Concern > 0†                                                                                          | 11 (100.0%)     | 78 (98.7%)       | 7 (70.0%)        | <b>0.0039</b> |
| General Beliefs - Harm                                                                                                    | 9.0 [6.0;12.0]  | 8.0 [6.0 ;11.0]  | 11.5[9.0 ;16.0]  | 0.0739        |
| General Beliefs - Overconsumption                                                                                         | 8.0 [5.0 ;12.0] | 10.0 [8.0 ;13.0] | 13.0 [9.0 ;16.0] | 0.1086        |

516 The results are presented in median [1st Quartile; 3rd Quartile] for quantitative variables and in the form of  
 517 frequencies (%) for qualitative variables

518 Specific belief scores range from 5 to 25 and general belief scores range from 4 to 20. A high score indicates a  
 519 strong belief.

520 †BMQ "necessity" - BMQ "concern" > 0 means that the beneficial character is superior to the worrying character.

521 BMQ: Belief Medical Questionnaire

522 **Table 3.** Correlation between adherence, beliefs and knowledge about their treatments for the  
 523 100 patients

524

|                         | Beliefs                      | Drugs mentioned |               | Known indications |               |
|-------------------------|------------------------------|-----------------|---------------|-------------------|---------------|
|                         |                              | r               | p             | r                 | p             |
| Good adherent<br>(N=11) | Specific Beliefs - Necessity | -0.22           | 0.5220        | 0.17              | 0.6185        |
|                         | Specific Beliefs - Concerns  | -0.01           | 0.9837        | -0.11             | 0.7403        |
|                         | General Beliefs - Harm       | 0.07            | 0.8488        | 0.15              | 0.6686        |
|                         | General Beliefs - Overuse    | 0.37            | 0.2651        | 0.26              | 0.442         |
| Low adherent<br>(N=79)  | Specific Beliefs - Necessity | 0.01            | 0.9540        | -0.07             | 0.5457        |
|                         | Specific Beliefs - Concerns  | -0.12           | 0.2994        | -0.11             | 0.3491        |
|                         | General Beliefs - Harm       | -0.21           | 0.0689        | -0.30             | <b>0.0069</b> |
|                         | General Beliefs - Overuse    | -0.23           | <b>0.0401</b> | -0.21             | 0.0630        |
| Non-adherent<br>(N=10)  | Specific Beliefs - Necessity | -0.35           | 0.3216        | -0.43             | 0.2149        |
|                         | Specific Beliefs - Concerns  | 0.41            | 0.2434        | 0.44              | 0.2064        |
|                         | General Beliefs - Harm       | 0.21            | 0.5643        | 0.57              | 0.0858        |
|                         | General Beliefs - Overuse    | 0.38            | 0.2726        | 0.47              | 0.1677        |

525



**Figure 1:** Responses to the BMQ questionnaire (percentage of responses among the 100 patients)



## Supplemental Table :

**Supplemental Table 1.** Characteristics of the population (N=100) and the drugs (N=965)

| Characteristics of patients                                         | N=100                   |
|---------------------------------------------------------------------|-------------------------|
| Female sex                                                          | 31 (31.0%)              |
| Age (years)                                                         | 70.8 ± 10.7 [38.0;92.0] |
| Time since first chronic treatment (years)                          | 19.4 ± 12.4 [0.5;58.0]  |
| Level of study                                                      |                         |
| Secondary level                                                     | 45 (45.0%)              |
| Higher study                                                        | 24 (24.0%)              |
| Primary level                                                       | 24 (24.0%)              |
| Lack of study                                                       | 7 (7.0%)                |
| Socio-professional category                                         |                         |
| Workers                                                             | 31 (31.0%)              |
| Intermediate professions                                            | 18 (18.0%)              |
| Employees                                                           | 17 (17.0%)              |
| Executives, Higher intellectual professions                         | 14 (14.0%)              |
| Craftsmen, Shopkeeper, Compagny managers                            | 12 (12.0%)              |
| Farmer                                                              | 5 (5.0%)                |
| Other†                                                              | 3 (3.0%)                |
| Lifestyle                                                           |                         |
| Circled                                                             | 91 (91.0%)              |
| Alone                                                               | 9 (9.0%)                |
| Organization around medication intake                               |                         |
| Autonomous                                                          | 83 (83.0%)              |
| Help from relatives (partner, children)                             | 11 (11.0%)              |
| Assistance from a nurse                                             | 6 (6.0%)                |
| Information received at the start of treatment                      | 87 (87.0%)              |
| Source of information                                               |                         |
| From the general practitioner                                       | 73 (73.0%)              |
| From the specialist doctor                                          | 61 (61.0%)              |
| From the pharmacist                                                 | 46 (46.0%)              |
| From family and friends                                             | 5 (5.0%)                |
| Information received perceived as sufficient by the patient         | 64 (64.0%)              |
| Need for additional research (Internet, books, magazines, leaflets) | 27 (27.0%)              |

| <b>Drug Characteristics</b>                   | <b>N=965</b>     |
|-----------------------------------------------|------------------|
| Number of drugs per patient                   | 9.7 ± 3.6 [5;21] |
| ATC class of drugs                            |                  |
| Cardiovascular (C)                            | 310 (32.0%)      |
| Alimentary tract and metabolism (A)           | 190 (19.8%)      |
| Nervous System (N)                            | 175 (18.0%)      |
| Blood and blood-forming organs (B)            | 141 (14.6%)      |
| Respiratory system(R)                         | 47 (4.9%)        |
| Systemic hormones, excluding sex hormones (H) | 19 (2.0%)        |
| Other‡                                        | 83 (8.7%)        |

Results are presented as mean ± standard deviation [minimum-maximum] for quantitative variables and as counts (%) for qualitative variables

\*To the question "Since when have you been taking your first chronic treatment?", 4 patients were unable to answer.

†Other occupations: Housewife (2%), No occupation (1%)

‡Other ATC class: J-General anti-infectives for systemic use (0.8%), L-Antineoplastics and immunomodulators (1.6%), P-Antiparasitic, insecticides (0.1%), V-Miscellaneous (0.6%), D-Dermatological drugs (0.5%), M-Muscle and skeletal (1.4%), S-Sensory organs (1%), G-Genitourinary system and sex hormones (1.7%), No ATC class (1%)

**Supplemental Table 2.** Correlation between different age categories and patients' knowledge (drugs and indications cited) (N = 100)

|                                 | Age (years) | [30-59]<br>N=10 | [60-69]<br>N=28 | [70-79]<br>N=46 | [80 and more]<br>N=16 | p-value       |
|---------------------------------|-------------|-----------------|-----------------|-----------------|-----------------------|---------------|
| Percentage of drugs cited       | Median      | 83.3            | 46.4            | 40.0            | 28.6                  | <b>0.0193</b> |
|                                 | [Q1;Q3]     | [66.7;100.0]    | [29.7;74.3]     | [18.2;71.4]     | [0.0;66.4]            |               |
|                                 | [Min-Max]   | [20.0 ;100.0]   | [0.0;100.0]     | [0.0;100.0]     | [0.0;100.0]           |               |
| Percentage of known indications | Median      | 100.0           | 75              | 80.9            | 84.5                  | 0.0761        |
|                                 | [Q1;Q3]     | [82.4;100.0]    | [55.2;90.5]     | [54.5;100.0]    | [39.4;100.0]          |               |
|                                 | [Min-Max]   | [60.0;100.0]    | [23.1;100.0]    | [0.0;100.0]     | [0.0;100.0]           |               |

Q1 : First Quartile ; Q3 : Third quartile ; Min : minimum ; Max : maximum

## Supplemental Files 1 : Global questionnaire

Patient n°: .....

Length of the interview: .....

### **Socio-demographic information :**

Gender:                      Age:                      Lifestyle:     Married     Single     Children

Origins:

Level of study:

Socio-professional category:     Farmer                       Craftsmen, Shopkeeper, Compagny managers

Executives, Higher intellectual professions                       Professions intermédiaires

Employees     Workers                      Other:.....

### **Chronic treatment :**

Number of medications on the prescription:

How long have you been taking your first chronic treatment?

### **Informations :**

- Have you ever had your treatments explained to you?    Yes     No
- Do you feel you have received enough information about your treatments?    Yes     No
- From whom did you get information about your treatments?
  - Specialist
  - General practitioner
  - Pharmacist
  - Family

### **Treatment management :**

- Who manages your treatments?
  - Myself
  - A nurse
  - A family member



## Supplemental Files 2 : Belief Medical Questionnaire

**Patient n°:**

Score:

1: Totally disagree, 2: Disagree, 3: Uncertain, 4: Agree, 5: Totally agree

### Specific Beliefs :

1. My health, at present, depends on my medicines:
2. Having to take medicines worries me:
3. My life would be impossible without my medicines:
4. Without my medicines I would be very ill:
5. I sometimes worry about long-term effects of my medicines:
6. My medicines are a mystery to me:
7. My health in the future will depend on my medicines:
8. My medicines disrupt my life:
9. I sometimes worry about becoming too dependent on my medicines:
10. My medicines protect me from becoming worse:

### General Beliefs :

11. Doctors use too many medicines:
12. People who take medicines should stop their treatment for a while every now and again:
13. Most medicines are addictive:
14. Natural remedies are safer than medicines:
15. Medicines do more harm than good:
16. All medicines are poisonous:
17. Doctors place too much trust in medicines:
18. If doctors had more time with patients, they would prescribe fewer medicines:

## Supplemental Files 3 : GIRERD questionnaire

### Assessment of medication compliance

Patient n° :

|                                                                                                                           | YES | NO |
|---------------------------------------------------------------------------------------------------------------------------|-----|----|
| Did you forget to take your medication this morning?                                                                      |     |    |
| Since your last visit, have you run out of medication?                                                                    |     |    |
| Have you ever been late taking your medication?                                                                           |     |    |
| Have you ever not taken your medication because your memory fails you some days?                                          |     |    |
| Have you ever not taken your medication, because some days you feel that your treatment is doing you more harm than good? |     |    |
| Do you think you have too many pills to take?                                                                             |     |    |



## Supplemental Files 4 : The local ethics committee

AVIS 22-06-2201

Groupe Nantais d'Éthique dans le Domaine de la Santé (GNEDS)

|                                        |                                                                                                        |
|----------------------------------------|--------------------------------------------------------------------------------------------------------|
| Nom du protocole<br>Code et versioning | <b>Croyances et représentations chez les patients polymédiqués en chirurgie et médecine vasculaire</b> |
|----------------------------------------|--------------------------------------------------------------------------------------------------------|

|                                        |                                                                                                          |
|----------------------------------------|----------------------------------------------------------------------------------------------------------|
| Investigateur principal                | Dr JF HUON                                                                                               |
| Lieu de l'étude                        | CHU NANTES                                                                                               |
| Type de l'étude                        | Monocentrique, prospective, exploratoire, observationnelle                                               |
| Type patients/participants             | Patients polymédiqués hospitalisés en chirurgie et médecine vasculaire                                   |
| Nombre de patients/participants prévus | 100                                                                                                      |
| Objectif principal                     | Evaluation de la croyance des patients sur leurs traitements habituels                                   |
| Objectif secondaire                    | Connaissance et importance données par le patient à chacun de ses traitements<br>Adhésion médicamenteuse |

### Documents communiqués

|                                                |     |
|------------------------------------------------|-----|
| Justification de l'étude                       | OUI |
| Méthodologie                                   | OUI |
| Lettre d'information et lettre de consentement | OUI |

### Remarque générale

Le GNEDS formule d'abord la remarque qu'il n'a pas pour mission de donner un avis sur les aspects scientifiques du protocole, en particulier sur l'adéquation de la méthodologie aux objectifs poursuivis par l'étude. Il ne tient compte des données d'ordre scientifique et méthodologique que dans la mesure où elles ont des implications d'ordre éthique. Dans le cas présent, il se bornera à constater que les objectifs de cette étude et sa méthodologie sont conformes aux principes de l'éthique.

### Confidentialité

|                 |      |
|-----------------|------|
| Confidentialité | OUI  |
| Anonymat        | OUI  |
| CNIL            | RGPD |

Commentaires :

**Information et consentement***Consentement :*

|                              |      |
|------------------------------|------|
| Recueil nécessaire           | OUI  |
| Type consentement préférable | ORAL |
| Traçabilité dans le dossier  | NA   |

Commentaires :

*Lettre information précisant :*

|                                              |     |
|----------------------------------------------|-----|
| Titre de l'étude                             | OUI |
| But de l'étude                               | OUI |
| Déroulement de l'étude                       | OUI |
| Prise en charge courante inchangée           | OUI |
| Possibilité de recevoir résultats de l'étude | OUI |
| Traçabilité dans le dossier                  | NA  |

Commentaires :

**Conclusion**

|                                        |     |
|----------------------------------------|-----|
| Avis favorable                         | OUI |
| Révision nécessaire selon commentaires |     |
| Avis défavorable                       |     |

**GNEDS : Professeur Paul BARRIERE**

Nantes le 22 juin 2022



# Reporting checklist for cross sectional study.

**An observational and prospective study: Evaluation of beliefs and representations of chronic treatments of polymedicated patients hospitalized in medicine and vascular surgery**

D. Kotry *et al.*

Based on the STROBE cross sectional guidelines.

## Instructions to authors

Complete this checklist by entering the page numbers from your manuscript where readers will find each of the items listed below.

Your article may not currently address all the items on the checklist. Please modify your text to include the missing information. If you are certain that an item does not apply, please write "n/a" and provide a short explanation.

Upload your completed checklist as an extra file when you submit to a journal.

In your methods section, say that you used the STROBE cross sectional reporting guidelines, and cite them as:

von Elm E, Altman DG, Egger M, Pocock SJ, Gotsche PC, Vandenbroucke JP. The Strengthening the Reporting of Observational Studies in Epidemiology (STROBE) Statement: guidelines for reporting observational studies.

|                           | Reporting Item                                                                                                      | Page Number |
|---------------------------|---------------------------------------------------------------------------------------------------------------------|-------------|
| <b>Title and abstract</b> |                                                                                                                     |             |
| Title                     | <a href="#">#1a</a> Indicate the study's design with a commonly used term in the title or the abstract              | 1           |
| Abstract                  | <a href="#">#1b</a> Provide in the abstract an informative and balanced summary of what was done and what was found | 2-3         |

## Introduction

|    |                      |                      |                                                           |     |
|----|----------------------|----------------------|-----------------------------------------------------------|-----|
| 1  | Background /         | <a href="#">#2</a>   | Explain the scientific background and rationale for the   | 4   |
| 2  | rationale            |                      | investigation being reported                              |     |
| 3  |                      |                      |                                                           |     |
| 4  | Objectives           | <a href="#">#3</a>   | State specific objectives, including any prespecified     | 5   |
| 5  |                      |                      | hypotheses                                                |     |
| 6  |                      |                      |                                                           |     |
| 7  |                      |                      |                                                           |     |
| 8  | <b>Methods</b>       |                      |                                                           |     |
| 9  |                      |                      |                                                           |     |
| 10 |                      |                      |                                                           |     |
| 11 | Study design         | <a href="#">#4</a>   | Present key elements of study design early in the paper   | 5   |
| 12 |                      |                      |                                                           |     |
| 13 | Setting              | <a href="#">#5</a>   | Describe the setting, locations, and relevant dates,      | 5   |
| 14 |                      |                      | including periods of recruitment, exposure, follow-up,    |     |
| 15 |                      |                      | and data collection                                       |     |
| 16 |                      |                      |                                                           |     |
| 17 |                      |                      |                                                           |     |
| 18 | Eligibility criteria | <a href="#">#6a</a>  | Give the eligibility criteria, and the sources and        | 5   |
| 19 |                      |                      | methods of selection of participants.                     |     |
| 20 |                      |                      |                                                           |     |
| 21 |                      |                      |                                                           |     |
| 22 |                      | <a href="#">#7</a>   | Clearly define all outcomes, exposures, predictors,       | 5-6 |
| 23 |                      |                      | potential confounders, and effect modifiers. Give         |     |
| 24 |                      |                      | diagnostic criteria, if applicable                        |     |
| 25 |                      |                      |                                                           |     |
| 26 |                      |                      |                                                           |     |
| 27 |                      |                      |                                                           |     |
| 28 | Data sources /       | <a href="#">#8</a>   | For each variable of interest give sources of data and    | 5-6 |
| 29 | measurement          |                      | details of methods of assessment (measurement).           |     |
| 30 |                      |                      | Describe comparability of assessment methods if there     |     |
| 31 |                      |                      | is more than one group. Give information separately for   |     |
| 32 |                      |                      | for exposed and unexposed groups if applicable.           |     |
| 33 |                      |                      |                                                           |     |
| 34 |                      |                      |                                                           |     |
| 35 |                      |                      |                                                           |     |
| 36 | Bias                 | <a href="#">#9</a>   | Describe any efforts to address potential sources of      | NA  |
| 37 |                      |                      | bias                                                      |     |
| 38 |                      |                      |                                                           |     |
| 39 |                      |                      |                                                           |     |
| 40 | Study size           | <a href="#">#10</a>  | Explain how the study size was arrived at                 | 5   |
| 41 |                      |                      |                                                           |     |
| 42 | Quantitative         | <a href="#">#11</a>  | Explain how quantitative variables were handled in the    | 6   |
| 43 | variables            |                      | analyses. If applicable, describe which groupings were    |     |
| 44 |                      |                      | chosen, and why                                           |     |
| 45 |                      |                      |                                                           |     |
| 46 |                      |                      |                                                           |     |
| 47 | Statistical          | <a href="#">#12a</a> | Describe all statistical methods, including those used to | 6   |
| 48 | methods              |                      | control for confounding                                   |     |
| 49 |                      |                      |                                                           |     |
| 50 |                      |                      |                                                           |     |
| 51 | Statistical          | <a href="#">#12b</a> | Describe any methods used to examine subgroups and        | NA  |
| 52 | methods              |                      | interactions                                              |     |
| 53 |                      |                      |                                                           |     |
| 54 |                      |                      |                                                           |     |
| 55 | Statistical          | <a href="#">#12c</a> | Explain how missing data were addressed                   | NA  |
| 56 | methods              |                      |                                                           |     |
| 57 |                      |                      |                                                           |     |
| 58 |                      |                      |                                                           |     |
| 59 |                      |                      |                                                           |     |
| 60 |                      |                      |                                                           |     |

|    |                  |                      |                                                              |               |
|----|------------------|----------------------|--------------------------------------------------------------|---------------|
| 1  | Statistical      | <a href="#">#12d</a> | If applicable, describe analytical methods taking            | NA            |
| 2  | methods          |                      | account of sampling strategy                                 |               |
| 3  |                  |                      |                                                              |               |
| 4  | Statistical      | <a href="#">#12e</a> | Describe any sensitivity analyses                            | NA            |
| 5  | methods          |                      |                                                              |               |
| 6  |                  |                      |                                                              |               |
| 7  |                  |                      |                                                              |               |
| 8  | <b>Results</b>   |                      |                                                              |               |
| 9  |                  |                      |                                                              |               |
| 10 |                  |                      |                                                              |               |
| 11 | Participants     | <a href="#">#13a</a> | Report numbers of individuals at each stage of study—        | 7             |
| 12 |                  |                      | eg numbers potentially eligible, examined for eligibility,   |               |
| 13 |                  |                      | confirmed eligible, included in the study, completing        |               |
| 14 |                  |                      | follow-up, and analysed. Give information separately         |               |
| 15 |                  |                      | for for exposed and unexposed groups if applicable.          |               |
| 16 |                  |                      |                                                              |               |
| 17 |                  |                      |                                                              |               |
| 18 |                  |                      |                                                              |               |
| 19 | Participants     | <a href="#">#13b</a> | Give reasons for non-participation at each stage             | NA            |
| 20 |                  |                      |                                                              |               |
| 21 | Participants     | <a href="#">#13c</a> | Consider use of a flow diagram                               | NA            |
| 22 |                  |                      |                                                              |               |
| 23 |                  |                      |                                                              |               |
| 24 | Descriptive data | <a href="#">#14a</a> | Give characteristics of study participants (eg               | 7             |
| 25 |                  |                      | demographic, clinical, social) and information on            |               |
| 26 |                  |                      | exposures and potential confounders. Give information        |               |
| 27 |                  |                      | separately for exposed and unexposed groups if               |               |
| 28 |                  |                      | applicable.                                                  |               |
| 29 |                  |                      |                                                              |               |
| 30 |                  |                      |                                                              |               |
| 31 |                  |                      |                                                              |               |
| 32 | Descriptive data | <a href="#">#14b</a> | Indicate number of participants with missing data for        | Supplemental  |
| 33 |                  |                      | each variable of interest                                    | Table 1       |
| 34 |                  |                      |                                                              |               |
| 35 |                  |                      |                                                              |               |
| 36 | Outcome data     | <a href="#">#15</a>  | Report numbers of outcome events or summary                  | 7-10 + tables |
| 37 |                  |                      | measures. Give information separately for exposed and        |               |
| 38 |                  |                      | unexposed groups if applicable.                              |               |
| 39 |                  |                      |                                                              |               |
| 40 |                  |                      |                                                              |               |
| 41 | Main results     | <a href="#">#16a</a> | Give unadjusted estimates and, if applicable,                | 7-10 + tables |
| 42 |                  |                      | confounder-adjusted estimates and their precision (eg,       |               |
| 43 |                  |                      | 95% confidence interval). Make clear which                   |               |
| 44 |                  |                      | confounders were adjusted for and why they were              |               |
| 45 |                  |                      | included                                                     |               |
| 46 |                  |                      |                                                              |               |
| 47 |                  |                      |                                                              |               |
| 48 |                  |                      |                                                              |               |
| 49 | Main results     | <a href="#">#16b</a> | Report category boundaries when continuous variables         | NA            |
| 50 |                  |                      | were categorized                                             |               |
| 51 |                  |                      |                                                              |               |
| 52 |                  |                      |                                                              |               |
| 53 | Main results     | <a href="#">#16c</a> | If relevant, consider translating estimates of relative risk | NA            |
| 54 |                  |                      | into absolute risk for a meaningful time period              |               |
| 55 |                  |                      |                                                              |               |
| 56 |                  |                      |                                                              |               |
| 57 |                  |                      |                                                              |               |
| 58 |                  |                      |                                                              |               |
| 59 |                  |                      |                                                              |               |
| 60 |                  |                      |                                                              |               |

|    |                    |                     |                                                                                                                                                                  |       |
|----|--------------------|---------------------|------------------------------------------------------------------------------------------------------------------------------------------------------------------|-------|
| 1  | Other analyses     | <a href="#">#17</a> | Report other analyses done—e.g., analyses of subgroups and interactions, and sensitivity analyses                                                                | NA    |
| 2  |                    |                     |                                                                                                                                                                  |       |
| 3  |                    |                     |                                                                                                                                                                  |       |
| 4  | <b>Discussion</b>  |                     |                                                                                                                                                                  |       |
| 5  |                    |                     |                                                                                                                                                                  |       |
| 6  |                    |                     |                                                                                                                                                                  |       |
| 7  | Key results        | <a href="#">#18</a> | Summarise key results with reference to study objectives                                                                                                         | 10    |
| 8  |                    |                     |                                                                                                                                                                  |       |
| 9  |                    |                     |                                                                                                                                                                  |       |
| 10 |                    |                     |                                                                                                                                                                  |       |
| 11 | Limitations        | <a href="#">#19</a> | Discuss limitations of the study, taking into account sources of potential bias or imprecision. Discuss both direction and magnitude of any potential bias.      | 15    |
| 12 |                    |                     |                                                                                                                                                                  |       |
| 13 |                    |                     |                                                                                                                                                                  |       |
| 14 |                    |                     |                                                                                                                                                                  |       |
| 15 |                    |                     |                                                                                                                                                                  |       |
| 16 | Interpretation     | <a href="#">#20</a> | Give a cautious overall interpretation considering objectives, limitations, multiplicity of analyses, results from similar studies, and other relevant evidence. | 10-16 |
| 17 |                    |                     |                                                                                                                                                                  |       |
| 18 |                    |                     |                                                                                                                                                                  |       |
| 19 |                    |                     |                                                                                                                                                                  |       |
| 20 |                    |                     |                                                                                                                                                                  |       |
| 21 | Generalisability   | <a href="#">#21</a> | Discuss the generalisability (external validity) of the study results                                                                                            | 14    |
| 22 |                    |                     |                                                                                                                                                                  |       |
| 23 |                    |                     |                                                                                                                                                                  |       |
| 24 |                    |                     |                                                                                                                                                                  |       |
| 25 | <b>Other</b>       |                     |                                                                                                                                                                  |       |
| 26 | <b>Information</b> |                     |                                                                                                                                                                  |       |
| 27 |                    |                     |                                                                                                                                                                  |       |
| 28 |                    |                     |                                                                                                                                                                  |       |
| 29 | Funding            | <a href="#">#22</a> | Give the source of funding and the role of the funders for the present study and, if applicable, for the original study on which the present article is based    | 17    |
| 30 |                    |                     |                                                                                                                                                                  |       |
| 31 |                    |                     |                                                                                                                                                                  |       |
| 32 |                    |                     |                                                                                                                                                                  |       |
| 33 |                    |                     |                                                                                                                                                                  |       |

The STROBE checklist is distributed under the terms of the Creative Commons Attribution License CC-BY. This checklist was completed on 30. November 2022 using <https://www.goodreports.org/>, a tool made by the [EQUATOR Network](#) in collaboration with [Penelope.ai](#)

# BMJ Open

## An observational and prospective study: Evaluation of beliefs and representations of chronic treatments of polymedicated patients hospitalized in a vascular medicine and surgery department

|                                 |                                                                                                                                                                                                                                                                                                                                                                                                                                                                                 |
|---------------------------------|---------------------------------------------------------------------------------------------------------------------------------------------------------------------------------------------------------------------------------------------------------------------------------------------------------------------------------------------------------------------------------------------------------------------------------------------------------------------------------|
| Journal:                        | <i>BMJ Open</i>                                                                                                                                                                                                                                                                                                                                                                                                                                                                 |
| Manuscript ID                   | bmjopen-2023-073250.R2                                                                                                                                                                                                                                                                                                                                                                                                                                                          |
| Article Type:                   | Original research                                                                                                                                                                                                                                                                                                                                                                                                                                                               |
| Date Submitted by the Author:   | 21-Oct-2023                                                                                                                                                                                                                                                                                                                                                                                                                                                                     |
| Complete List of Authors:       | Kotry, Dounia; University Hospital Centre Nantes, Saillard, Justine; CHU Nantes, Pharmacy<br>Bonsergent, Marion; CHU Nantes, Pharmacy<br>Volteau, Christelle; Centre Hospitalier Universitaire de Nantes<br>Benichou, Antoine; CHU Nantes, Internal Medicine<br>Prot-Labarthe, Sonia; Nantes Université, Pharmacie; ECEVE<br>HUON, Jean-François; University Hospital Centre Nantes, Clinical Pharmacy; University of Nantes, Faculty of Pharmacy, Clinical Pharmacy department |
| <b>Primary Subject Heading</b>: | Cardiovascular medicine                                                                                                                                                                                                                                                                                                                                                                                                                                                         |
| Secondary Subject Heading:      | Patient-centred medicine                                                                                                                                                                                                                                                                                                                                                                                                                                                        |
| Keywords:                       | Patient-Centered Care, CLINICAL PHARMACOLOGY, Patient Reported Outcome Measures                                                                                                                                                                                                                                                                                                                                                                                                 |
|                                 |                                                                                                                                                                                                                                                                                                                                                                                                                                                                                 |

SCHOLARONE™  
Manuscripts



I, the Submitting Author has the right to grant and does grant on behalf of all authors of the Work (as defined in the below author licence), an exclusive licence and/or a non-exclusive licence for contributions from authors who are: i) UK Crown employees; ii) where BMJ has agreed a CC-BY licence shall apply, and/or iii) in accordance with the terms applicable for US Federal Government officers or employees acting as part of their official duties; on a worldwide, perpetual, irrevocable, royalty-free basis to BMJ Publishing Group Ltd ("BMJ") its licensees and where the relevant Journal is co-owned by BMJ to the co-owners of the Journal, to publish the Work in this journal and any other BMJ products and to exploit all rights, as set out in our [licence](#).

The Submitting Author accepts and understands that any supply made under these terms is made by BMJ to the Submitting Author unless you are acting as an employee on behalf of your employer or a postgraduate student of an affiliated institution which is paying any applicable article publishing charge ("APC") for Open Access articles. Where the Submitting Author wishes to make the Work available on an Open Access basis (and intends to pay the relevant APC), the terms of reuse of such Open Access shall be governed by a Creative Commons licence – details of these licences and which [Creative Commons](#) licence will apply to this Work are set out in our licence referred to above.

Other than as permitted in any relevant BMJ Author's Self Archiving Policies, I confirm this Work has not been accepted for publication elsewhere, is not being considered for publication elsewhere and does not duplicate material already published. I confirm all authors consent to publication of this Work and authorise the granting of this licence.



1  
2  
3  
4 1 **An observational and prospective study: Evaluation of beliefs and**  
5  
6  
7 2 **representations of chronic treatments of polymedicated patients**  
8  
9  
10 3 **hospitalized in a vascular medicine and surgery department**  
11  
12  
13 4

14 5 Dounia KOTRY<sup>1</sup>, Justine SAILLARD<sup>1</sup>, Marion BONSERGENT<sup>1</sup>, Christelle VOLTEAU<sup>2</sup>,

16 6 Antoine BENICHO<sup>3</sup>, Sonia PROT-LABARTHE<sup>4</sup>, Jean-François HUON<sup>5</sup>  
17  
18  
19  
20 7

21 8 **University degree:**  
22  
23 9

24 10 Dounia KOTRY, PharmD

25 11 Justine SAILLARD, PharmD

26 12 Marion BONSERGENT, PharmD

27 13 Christelle VOLTEAU

28 14 Antoine BENICHO, MD

29 15 Sonia PROT-LABARTHE, PharmD, PhD

30 16 Jean-François HUON, PharmD, PhD  
31  
32  
33  
34  
35  
36  
37  
38  
39  
40  
41  
42  
43  
44  
45 17

46 18 **Affiliations:**

47 19 1. Nantes Université, CHU Nantes, Pharmacie, F-44000, France

48 20 2. Plateforme de Méthodologie et Biostatistique, DRi du CHU de Nantes, Nantes, France

49 21 3. Nantes Université, CHU Nantes, Médecine interne, F-44000, France

50 22 4. Nantes Université, CHU Nantes, Pharmacie, F-44000, France, Université Paris Cité,

51 23 INSERM, ECEVE, F-75010 Paris, France  
52  
53  
54  
55  
56  
57  
58  
59  
60

1  
2  
3 24 5. Nantes Université, Univ Tours, CHU Nantes, CHU Tours, Pharmacie, INSERM, MethodS  
4  
5  
6 25 in Patients-centered outcomes and HEalth Research, SPHERE, F-44000 Nantes, France  
7  
8

9 26

10 27 **Corresponding author:**

11  
12  
13 28 Dounia KOTRY, dounia.kotry@gmail.com  
14

15 29 **Mails:**

16  
17  
18 30 Justine SAILLARD: justine.saillard@chu-nantes.fr  
19

20 31 Marion BONSERGENT: marion.bonsergent@chu-nantes.fr  
21

22 32 Christelle VOLTEAU: christelle.volteau@chu-nantes.fr  
23

24 33 Antoine BENICHO: antoine.benichou@chu-nantes.fr  
25

26  
27 34 Sonia PROT-LABARTHE: sonia.protlabarthe@chu-nantes.fr  
28

29 35 Jean-François HUON: jeanfrancois.huon@chu-nantes.fr  
30  
31

32 36 **Abstract**  
33  
34

35  
36 37 **Objectives:** Today, the involvement of patients in their care is essential. As the population ages  
38  
39  
40 38 increases, the number of patients with chronic diseases is increasing. In the vascular medicine  
41  
42  
43 39 and surgery departments, patients are polymedicated and mostly suffer from several chronic  
44  
45  
46 40 diseases. Approximately 50% of patients with a chronic disease are not adherent. Among the  
47  
48  
49  
50 41 factors that can influence therapeutic adherence are the beliefs and representations of patients.  
51  
52  
53 42 To evaluate the beliefs and representations of chronic treatments in patients with multiple  
54  
55  
56 43 medications and hospitalized in a vascular medicine and surgery department, and to evaluate  
57  
58  
59 44 the medication adherence, the knowledge, and the importance patients attach to their treatments.  
60

1  
2  
3  
4 45 **Design:** Observational, prospective and a single-center study.  
5  
6

7 46 **Setting:** The study was conducted in a French tertiary hospital center of around 3000 beds in 9  
8  
9  
10 47 institutions.  
11  
12

13  
14 48 **Participants:** Adult polymedicated (i.e minimum of 5 chronic treatments) patients hospitalized  
15  
16  
17 49 in a vascular medicine and surgery department were included after application of the exclusion  
18  
19  
20 50 criteria.  
21  
22

23 51 **Methods:** Patient interviews were carried out in the department and were based on three  
24  
25  
26  
27 52 interviewer administered questionnaires (a global questionnaire, the Belief Medical  
28  
29  
30 53 Questionnaire (BMQ) and the GIRERD questionnaire).  
31  
32

33 54 **Results:** Our study showed that patients perceived their treatments as beneficial rather than  
34  
35  
36  
37 55 worrying. A correlation between medication adherence and beliefs was observed. "Non-  
38  
39  
40 56 adherent" patients had a more negative overall view of medication than "adherent" patients.  
41  
42  
43 57 The level of compliance and knowledge of our patients was low. Only 11% of the patients were  
44  
45  
46  
47 58 "good adherent", 16% of the patients could perfectly name their treatment and 36% knew all  
48  
49  
50 59 the indications.  
51  
52

53 60 **Conclusion:** Knowledge of treatment representation and beliefs are central to understanding  
54  
55  
56  
57 61 patient behaviour. Considering patients' representations will allow the identification of levers,  
58  
59  
60

1  
2  
3  
4 62 and the development of actions and educational tools adapted to improve their adherence, their  
5  
6  
7 63 knowledge and therefore their drug management.  
8  
9

10 64 Data availability statement: Data are available upon reasonable request  
11  
12  
13  
14 65  
15  
16

## 17 66 **Strengths and limitations of this study**

- 21 67 • This study is pioneering in its examination of the representation and beliefs associated  
22  
23  
24 68 with chronic treatments within a vascular medicine and surgery department.  
25  
26  
27  
28 69 • We employed validated and widely accepted questionnaires to assess beliefs and  
29  
30  
31 70 measure medication adherence.  
32  
33  
34  
35 71 • Nonetheless, it is crucial to acknowledge that this study was conducted at a single center,  
36  
37  
38 72 which may limit the broader applicability of the findings.  
39  
40  
41 73 • It is worth noting that medication adherence questionnaires often tend to overestimate  
42  
43  
44 74 adherence, underscoring the importance of employing multiple measurement methods.  
45  
46  
47  
48  
49  
50  
51  
52  
53  
54  
55  
56  
57  
58  
59  
60

## 75 **Introduction**

76 A chronic disease can be defined as a long-term condition that usually progresses slowly and  
77 requires long-term treatment and care (1). It is also characterized by its impact on the quality  
78 of life of patients. About twenty million people in France are affected by a chronic disease (1),  
79 the most frequent being cardiovascular, cerebral, respiratory and metabolic diseases, as well as  
80 malignant tumors (2). Today, the prevalence of chronic diseases is rising sharply and can be  
81 explained by the aging of the population and the increase in life expectancy. They are therefore  
82 among the most common health care problems, with a major impact on public health and the  
83 economy (3).

84 In the vascular medicine and surgery department, the majority of patients have one or more  
85 chronic diseases and are polymedicated (4). Polymedication is defined as "the administration  
86 of many drugs simultaneously or the administration of an excessive number of drugs" (5,6).  
87 Furthermore, all chronic diseases require long-term management with an investment by both  
88 healthcare professionals and the patient. For this, a good level of information on the disease and  
89 treatments is necessary for the patient to avoid the risks of poor compliance. According to the  
90 WHO (7), 50% of patients do not adhere to their chronic treatment, even though this adherence  
91 is essential for the control of the chronic disease. Indeed, loss of adherence to treatment leads

92 to a decrease in therapeutic efficacy and exposes the patient to complications of their disease  
93 and to therapeutic failure (7).

94 The representations of treatments are factors that influence therapeutic adherence (8). This  
95 refers to each individual's knowledge, explanations and ideas about his disease.  
96 Representations are linked to the patient's behaviour, cultural, social and family background,  
97 education, professional activity, etc. (9). They have multiple origins and varies from one  
98 individual to another. Today, the representation of the disease, but also of treatments, is central  
99 to understanding the behaviour of patients in their health care journey. Representations and  
100 beliefs have been studied in certain chronic diseases, notably HIV, diabetes, hypertension,  
101 asthma, etc. (9-12).

102 However, to our knowledge, they have not been studied in a vascular medicine and surgery  
103 department fields, when it comes to hospitalized patients with multiple medications.

104 The main objective of this study was to evaluate the beliefs and representations of chronic  
105 treatments in multi-medicated patients hospitalized in a vascular medicine and surgery  
106 department Secondly, the patients' knowledge of their treatments, the importance given by the  
107 patient to each of their treatment and the medication adherence were assessed.

## 108 **Material and methods**

1  
2  
3  
4 109 This was an observational, prospective, single-center study conducted in a French tertiary  
5  
6  
7 110 hospital center of around 3000 beds in 9 institutions.

8  
9  
10 111 Patients included had to be over 18 years of age and hospitalized in the vascular medicine and  
11  
12  
13 112 surgery department, which comprises 28 beds. Patients had to be polymedicated prior the  
14  
15  
16  
17 113 hospitalization. Drawing on literature data (5) and the experience of our medication  
18  
19  
20 114 reconciliation activity, the threshold of five medications as a reference to designate  
21  
22  
23 115 polymedicated patients was established.

24  
25  
26  
27 116 Patients who were unable to participate in an interview because of cognitive impairment or  
28  
29  
30 117 language barrier were not included. All patients underwent a medication review on admission  
31  
32  
33  
34 118 to the vascular medicine and surgery department to obtain a complete record of their usual  
35  
36  
37 119 treatment. The patient inclusion period was from early March 2022 to late June 2022. All  
38  
39  
40 120 participants provided oral consent.

41  
42  
43 121 The study was based on three questionnaires completed during the patient's hospitalization. All  
44  
45  
46  
47 122 questionnaires were interviewer administered and concerned the treatments patients were  
48  
49  
50 123 taking prior to hospitalization.

51  
52  
53 124  
54  
55  
56  
57 125 1/ a global questionnaire, specifically developed for the study, regarding the patient's  
58  
59  
60 126 sociodemographic data, their usual treatments identified by the reconciliation and their

1  
2  
3  
4 127 medication management, the information received about his treatments, the knowledge he had  
5  
6  
7 128 of his treatments (name and indication) as well as the importance he gave to each medication  
8  
9  
10 129 (scored from 1 to 10).

11  
12  
13 130 2/ the BMQ (Belief Medical Questionnaire). It allows for the evaluation of different specific  
14  
15  
16  
17 131 dimensions of patients' beliefs about their medical treatments. It consists of 18 items divided  
18  
19  
20 132 into two parts: specific beliefs (patients' representations of their medical prescriptions - 10  
21  
22  
23 133 items) and general beliefs (beliefs in medicine in general - 8 items). A 5-point Likert scale was  
24  
25  
26  
27 134 used for the responses. For each question, a total score was calculated by adding the item scores.  
28  
29  
30 135 Each specific belief could get a score between 5 and 25, and each general belief a score between  
31  
32  
33  
34 136 4 and 20. The higher the scores, the more important the beliefs are. For specific beliefs, a  
35  
36  
37 137 differential score is calculated by subtracting the specific concern from the specific need. A  
38  
39  
40 138 score greater than 0 means that the perceived need for treatment is greater than the concerns.  
41  
42  
43  
44 139 The validated French version of this questionnaire was used (10).

45  
46  
47 140 3/ the validated GIRERD medication adherence questionnaire, composed of 6 items (13).  
48  
49  
50 141 GIRERD score: six negative ("no") responses: patient is "good adherent". Four or five "no"  
51  
52  
53  
54 142 responses: patient is "low-adherent ". Two or three "no" responses: the patient is "non-  
55  
56  
57 143 adherent".

58  
59  
60 144 The interviews were conducted by the first author.



1  
2  
3 145 Characteristics of the patients and the drugs were presented with mean, standard deviation,  
4  
5 146 minimum and maximum for the quantitative variable and with frequency and percentage of  
6  
7  
8 147 each category. Spearman's correlation coefficient were used to measure association between  
9  
10  
11 148 two continuous variables. Comparison of groups were performed using Chi-squared tests for  
12  
13  
14 149 categorical variables and using ANOVA, or Kruskal-Wallis tests for continuous variables,  
15  
16  
17  
18 150 depending of the normality or not of the distribution. The statistical significance was established  
19  
20  
21 151 with a threshold to 5%. All analyses were performed using SAS® version 9.4 software.

22  
23  
24  
25 152 This study was approved by the local ethics committee (Groupe Nantais d'Ethique dans le  
26  
27  
28 153 Domaine de la Santé) on June 22th 2022 (GNEDS 20220622).

29  
30  
31 154 Patient and Public Involvement: No patient involved  
32  
33

## 34 35 36 155 **Results**

### 37 38 39 156 **Characteristics of the patients and their treatments**

40  
41  
42  
43 157 Over the period, three hundred sixty five patients underwent a medication reconciliation. Of the  
44  
45  
46 158 patients eligible and available at the time of service, one hundred patients were included in the  
47  
48  
49 159 study. All patients completed the study and were analyzed. The characteristics of the patients  
50  
51  
52  
53 160 and their treatments are presented in *Supplemental Table 1*. Patients reported being treated for  
54  
55  
56 161 an estimated period of 19.4(± 12.4) years. On average, 9.4 (± 3.6) drugs were prescribed  
57  
58  
59 162 simultaneously, mostly for cardiovascular (32%), digestive (19.8%) or neurological (18%)

1  
2  
3  
4 163 diseases. The majority of patients were informed about their treatments by a doctor, but more  
5  
6  
7 164 than a quarter (27%) felt the need for more information.  
8  
9

10 165 Women felt that they received less information about drugs from healthcare professionals than  
11  
12  
13 166 men (48.4% vs. 71.0%,  $p = 0.0292$ ).  
14  
15

16 167  
17  
18 168 **Beliefs**  
19

20  
21 169 The results of the BMQ questionnaire for the population are presented in *Figure 1* and the BMQ  
22  
23  
24  
25 170 score values are detailed in *Table 1*. Overall, patients said that their medication helped them not  
26  
27  
28 171 to feel worse, that without it they would be sicker or that their life would be impossible. They  
29  
30  
31  
32 172 were aware that their future life depended on taking them. However, almost one in three patients  
33  
34  
35 173 felt that doctors were too trusting of medication, and that they would prescribe less if they had  
36  
37  
38 174 more time. The BMQ scores clearly show that the balance of benefits and risks perceived by  
39  
40  
41  
42 175 the patients is clearly in favor of taking the treatments for 96% of them.  
43  
44

45 176 The more medications patients took, the more they believed in the importance of their treatment  
46  
47  
48 177 ( $r = 0.27$ ,  $p = 0.0064$ ). Women believed more in the harm of treatments ( $p = 0.0352$ ) and in the  
49  
50  
51  
52 178 overuse of drugs than men ( $p = 0.0170$ )  
53  
54

55 179  
56  
57  
58 180 **Compliance**  
59  
60

1  
2  
3  
4 181 The responses to the GIRERD questionnaire are presented in *Table 2*. Only 11% of patients had  
5  
6  
7 182 good medication adherence with their treatments according to the questionnaire score. One in  
8  
9  
10 183 10 was considered totally non-adherent.

11  
12  
13 184 The more a good medication adherence patients have, the more they believed in the importance  
14  
15  
16  
17 185 of their medication ( $p = 0.0039$ ).

18  
19  
20 186 No significant association was found between the level of medication adherence and age ( $p =$   
21  
22  
23 187  $0.50$ ), level of education ( $p = 0.52$ ) or number of medications ( $p = 0.0733$ ).

24  
25  
26  
27 188

28  
29 189 **Knowledge**

30  
31  
32  
33 190 On average, patients were able to name 49.3% of their treatments. Sixteen percent of patients  
34  
35  
36 191 could name all of their treatments, while 11% of patients could not name any of their treatments.

37  
38  
39 192 On average, patients knew 73.1% of the indications for all their usual treatments. When 32  
40  
41  
42  
43 193 patients were able to name all the indications of their medication, 3 patients could not name  
44  
45  
46 194 any.

47  
48  
49 195 Several correlations were found, notably between age and patient knowledge (*Supplemental*  
50  
51  
52 196 *Table 2*), but also with educational level. Indeed, patients with higher education knew more  
53  
54  
55  
56 197 about the indications of their treatments (mean=  $85.1 \pm 22.8$ ) than patients with no education  
57  
58  
59 198 (mean=  $40.9 \pm 29.4$ ) ( $p = 0.0017$ ).

1  
2  
3  
4 199 The least cited drug classes were anti-histamines for systemic use (28.6%), analgesics (26.8%),  
5  
6  
7 200 anti-anemic preparations (24.0%) and ophthalmic drugs (20%).  
8  
9

10 201 Among the most prescribed drug classes, the most cited were anti-thrombotics (64.7% of the  
11  
12  
13 202 116 prescriptions), beta-blockers (55.9% of the 59 prescriptions), drugs acting on the renin  
14  
15  
16  
17 203 angiotensin system (49.3% of 67 the prescriptions) and anti-diabetics (46.8% of the 62  
18  
19  
20 204 prescriptions).  
21  
22

23 205 The drug classes for which patients demonstrated inadequate knowledge regarding their  
24  
25  
26  
27 206 indications primarily included cardiology drugs (60%), anti-anemic preparations (48%),  
28  
29  
30 207 diuretics (47.5%), beta-blockers (45.8%) and lipid-lowering drugs (45%).  
31  
32

33 208 When patients were asked about their treatments, a large proportion did not spontaneously  
34  
35  
36  
37 209 mention the drugs they took "if needed", in particular analgesics (26,8% of the 82 prescriptions)  
38  
39  
40 210 such as paracetamol or symptomatic drugs such as antihistamines (28,7% of the 14  
41  
42  
43 211 prescriptions).  
44  
45

46  
47 212 A comparison between beliefs, compliance and knowledge was made. The results obtained are  
48  
49  
50 213 detailed in *Table 3*. For patients with low adherence, the more they knew the indications of their  
51  
52  
53 214 treatments, the less they feared their harmfulness. And the more they knew how to name  
54  
55  
56  
57 215 treatments, the less they feared overuse.  
58  
59

60 216

## 217 **Importance ratings**

218 Fourteen patients were unable to rate the importance of their treatment because they felt that all

219 their medications were equally important.

220 Out of the most prescribed drug classes, two had a median importance score of less than 6:

221 nasal preparations (3 prescriptions, median score 5.0) and constipation medications (13

222 prescriptions, median score 5.5). Those with the highest importance scores were antidiabetics

223 (62 prescriptions, median score 9.5), immunosuppressants (10 prescriptions, median score 10),

224 and antithrombotics (116 prescriptions, median score 9).

225 Symptomatic medications scored high in importance. Analgesics (82 prescriptions),

226 antihistamines (14 prescriptions), and medications for acid-related disorders (52 prescriptions)

227 all received a median score of 8.

228 There was no significant correlation between median patient ratings and compliance ( $r = -0.13$ ,

229  $p = 0.3623$ ).

## 230 **Discussion**

231 Our study showed that patients perceived their treatments as beneficial rather than worrying. A

232 correlation between medication adherence and beliefs was observed. "Non-adherent" patients

1  
2  
3  
4 233 had a more negative overall perception of medication compared to "adherent patients". The  
5  
6  
7 234 level of medication adherence and knowledge of our patients was low. Only 11% of the patients  
8  
9  
10 235 had "good medication adherence", 16% of the patients could perfectly name their treatment and  
11  
12  
13 236 36% knew all the indications.  
14  
15  
16  
17 237 In recent years, several studies have assessed treatment representations and their influence on  
18  
19  
20 238 medication adherence. However, to our knowledge, this study is the first to examine patients'  
21  
22  
23 239 beliefs about their chronic treatment in relation to their knowledge and medication adherence  
24  
25  
26  
27 240 in a vascular medicine and surgery department.  
28  
29  
30 241 Our results regarding the importance attributed by patients to their chronic medication are  
31  
32  
33 242 consistent with the data found in the literature. French studies have evaluated the representation  
34  
35  
36  
37 243 of treatments in chronic pathologies, particularly in asthma (12), diabetes and HIV (10), and  
38  
39  
40 244 bronchopulmonary cancer (14). All these studies have highlighted the importance that patients  
41  
42  
43  
44 245 attach to their medication. Therefore, patients perceive their treatment as beneficial rather than  
45  
46  
47 246 worrisome. Indeed, in our study, 77% of patients were not worried about taking medication and  
48  
49  
50 247 76% were not disturbed by medication in their daily lives.  
51  
52  
53  
54 248 Several studies have demonstrated a correlation between patients' representations of their  
55  
56  
57 249 treatment and the level of medication adherence. Horne *et al.* established this link for each of  
58  
59  
60 250 the chronic pathologies studied via the BMQ questionnaire in a cohort of 324 patients with

1  
2  
3  
4 251 diverse chronic diseases (asthma, oncology, cardiac and renal diseases). Indeed, the "necessity"  
5  
6  
7 252 score was correlated with good medication adherence and the "concern" score was related to  
8  
9  
10 253 poor medication adherence in each of the diseases studied (11). Although our results could not  
11  
12  
13 254 show a significant correlation but a trend towards the same result. Conducting disease-specific  
14  
15  
16  
17 255 analyses with larger sample sizes could confirm this trend.

18  
19  
20 256 A French study also explored correlations between beliefs and medication adherence among  
21  
22  
23 257 patients with chronic diseases in general medical practices (15). Of the 265 patients included in  
24  
25  
26  
27 258 the study, 40.8% had good medication adherence, 53.2% were "moderately adherent" and 6%  
28  
29  
30 259 were "non-adherent". In our study, only 11% of patients were "good adherent". This can be  
31  
32  
33 260 partially explained by a significant difference in the average number of medications taken by  
34  
35  
36  
37 261 patients. In their study, patients had an average of  $3.6 \pm 2.6$  medications, almost three times less  
38  
39  
40 262 than in our study. One of the 6 questions of the GIRERD questionnaire related to the amount  
41  
42  
43 263 of medication to be taken: "Do you think you have too many pills to take" and 67% of our  
44  
45  
46  
47 264 patients answered "yes". This may explain the low rate of "good adherent".

48  
49  
50 265 Deat *et al.* highlighted a significant correlation between the degree of adherence and the BMQ  
51  
52  
53 266 scores "concerns", "harmfulness" and "overuse", supporting the trend shown in our study. The  
54  
55  
56  
57 267 absence of a statistical significance could be explained by an important difference in the number  
58  
59  
60 268 of patients in each compliant group. Only ten patients were "non-adherent". Regarding the

1  
2  
3  
4 269 concerns of "non-adherent" patients, our results are consistent with their study: patients were  
5  
6  
7 270 more concerned with their treatment, which may have an impact on medication adherence.  
8  
9  
10 271 Fall *et al.* conducted a study among diabetic and HIV patients (10). A disease-specific analysis  
11  
12  
13 272 demonstrated significant correlations between medication adherence and the necessity and  
14  
15  
16  
17 273 worry scales. Thus, negative beliefs were predictive of poor adherence. "Non-adherent"  
18  
19  
20 274 patients would therefore have a more negative overall view of medication than adherent  
21  
22  
23  
24 275 patients.  
25  
26  
27 276 According to the study by Huon *et al.* (16), the average number of medications taken by the  
28  
29  
30 277 elderly is 8 in the 70–80-year-olds, 9.61 in the 80–90-year-olds, 9.92 in the 90–100-year-olds  
31  
32  
33  
34 278 and 8.11 for the over 100-year-olds. Overall, the increase in medication use varies as the  
35  
36  
37 279 population ages. Our patients, with an average age of 70.8 years, took an average of 9.7  
38  
39  
40 280 medications. Unfortunately, the higher the number of medications, the higher the risk of  
41  
42  
43  
44 281 forgetting or not taking the treatments (17). This high number of medications also has a role in  
45  
46  
47 282 patients' knowledge and beliefs. Our results demonstrated that the more medications patients  
48  
49  
50 283 took, the less they knew about their names and indications. These results are consistent with  
51  
52  
53  
54 284 those reported in the literature (18).  
55  
56  
57 285 One study showed that knowledge of drug indications varied based on the ATC class. Indeed,  
58  
59  
60 286 the drug classes where indications were not known included cardiovascular drugs (12%),



1  
2  
3  
4 287 asthma drugs (5%) and estrogen therapies (5%) (19). In our study, we also noted that indications  
5  
6  
7 288 for cardiovascular drugs were the least known. This observation aligns with the fact that patients  
8  
9  
10 289 in the vascular medicine and surgery department have many cardiology medications. It is  
11  
12  
13  
14 290 therefore essential that caregivers take sufficient time with patients to educate and involve them  
15  
16  
17 291 in their care. Persall *et al.* (19) also revealed that the older and less educated the patients were,  
18  
19  
20 292 the less they knew about their treatments. Our results support these findings.  
21  
22  
23  
24 293 Only 16% of patients could perfectly name their treatment and 36% knew all the indications.  
25  
26  
27 294 In general, the level of knowledge of patients about their treatment was low. However,  
28  
29  
30 295 comparing our results to existing literature is challenging due to disparities in the number of  
31  
32  
33  
34 296 drugs per patient and the number of patients included. Akici *et al.* (20) showed, in a study  
35  
36  
37 297 including 1618 patients with an average of 3.3 drugs per patient, that only 10.9% of patients  
38  
39  
40 298 could correctly name their treatment. Given the average number of medications taken by the  
41  
42  
43  
44 299 patients in our study, over 9, it seems normal that the number of patients who could cite their  
45  
46  
47 300 entire treatment is low in our results. The study by Haidar-Ahmad *et al.* including 351 patients,  
48  
49  
50 301 with a mean number of medications taken of 3.83, described that 80.74% of the medications  
51  
52  
53  
54 302 were known by the patients (21). Persall *et al.*, included 616 patients in their study. Only 13.5%  
55  
56  
57 303 of patients did not know any of the indications. They also noted a significant lack of knowledge  
58  
59  
60 304 of their patients for cardiovascular medications (19).

1  
2  
3  
4 305 Although patient knowledge levels and medication adherence were low, the importance they  
5  
6  
7 306 attached to their treatment was high. Patient ratings indicated that the majority of prescribed  
8  
9  
10 307 drug classes were considered important to them. Only four ATC classes scored below average.  
11  
12  
13 308 This outcome confirms the "necessity" score obtained in the BMQ questionnaire. A French  
14  
15  
16 309 study assessed drug-related representations in patients with multiple myeloma (22). The authors  
17  
18  
19  
20 310 estimated the importance the patient placed on his or her medications. Antithrombotic drugs,  
21  
22  
23 311 unlike our study, were rated lower, whereas anticancer drugs scored highest. This significant  
24  
25  
26 312 difference between medications that are all part of the overall management of myeloma could  
27  
28  
29  
30 313 be explained by the degree of information provided to patients. Indeed, while the direct link  
31  
32  
33 314 between anticancer drugs and myeloma can easily be made, the link between antithrombotic  
34  
35  
36 315 drugs and the fatal consequences of myeloma is less intuitive. Our work reports on patients with  
37  
38  
39  
40 316 multiple and varied chronic pathologies, with a large number of prescribed medications.  
41  
42  
43 317 Despite this, few differences were observed between ATC classes and therefore chronic  
44  
45  
46 318 pathologies. For a majority of patients, all treatments carried equivalent importance. Indeed,  
47  
48  
49  
50 319 even if the patients did not spontaneously cite their symptomatic treatments, they gave them a  
51  
52  
53 320 high importance. This is due to the perceived immediate effect of using these treatments. This  
54  
55  
56 321 finding is in alignment with another study (23) which demonstrated that patients exhibited  
57  
58  
59  
60 322 greater familiarity with analgesics compared to cardiovascular drugs, as they could directly

1  
2  
3  
4 323 sense their effects. Notably, in our study, patients were very familiar with the effects of their  
5  
6  
7 324 symptomatic medications but did not cite them directly. This individual perception of treatment  
8  
9  
10 325 efficacy has been described as a determining factor in patient adherence to medication (24).  
11  
12  
13 326 Moreover, if representations about treatments impact patient adherence, adherence is also  
14  
15  
16  
17 327 determined by the relationship of trust with the physician. Several studies have shown that the  
18  
19  
20 328 relationship between the physician and the patient has a significant impact on the feeling of  
21  
22  
23 329 usefulness and efficacy of the treatment, but also on adherence (25). Research has indicated  
24  
25  
26  
27 330 that patients exhibit improved medication adherence when they possess sufficient information  
28  
29  
30 331 and a clear understanding of the rationale behind their treatment (26). As described by Peh et  
31  
32  
33 332 al. in their study, various factors contribute to therapeutic adherence, include healthcare  
34  
35  
36  
37 333 professionals. For them, medication adherence depends on patients' perceived needs and beliefs  
38  
39  
40 334 about medication, which are, in turn, influenced by the information and advice provided by the  
41  
42  
43 335 healthcare provider during the medical consultation (27). In our study, the majority of patients  
44  
45  
46  
47 336 reported receiving information about their treatment, but one third felt that this was not  
48  
49  
50 337 sufficient.  
51  
52  
53 338 In our study, we were interested in the link between beliefs and adherence. Nevertheless,  
54  
55  
56  
57 339 therapeutic adherence represents a multifaceted behavior shaped by a multitude of factors;  
58  
59  
60 340 factors linked to the patient (age for example, beliefs), to the care team (information), to the

1  
2  
3  
4 341 disease (asymptomatic or symptomatic), to the treatment (undesirable effects or not), and to  
5  
6  
7 342 social and economic factors (24,27). A better information would mean a more effective and  
8  
9  
10 343 safer treatment for the patient. Consequently, this perception aids in optimizing their  
11  
12  
13 344 medication-taking behavior over an extended period (24).

14  
15  
16 345 Assessing patients' beliefs would allow us to better target their priorities, and thus to develop  
17  
18  
19 346 adapted educational actions and tools. Indeed, understanding the mechanisms and potential  
20  
21  
22 347 evolution of the disease will make it easier for patients to assimilate the objectives of their  
23  
24  
25 348 treatments and will facilitate their therapeutic adherence (28).

26  
27  
28  
29  
30 349

31  
32 350

33  
34 351

### 35 352 **Strengths and biases**

36  
37  
38 353 To our knowledge, the representation and beliefs of chronic treatments have not been studied  
39  
40  
41 354 in a vascular medicine and surgery department, in patients with multiple medications and  
42  
43  
44 355 cardiac pathologies. This is a single-center study. It would be of interest to replicate this  
45  
46  
47 356 investigation across multiple centers to achieve outcomes that are both generalizable and  
48  
49  
50 357 transferable.

51  
52  
53 358 In our study, the BMQ was used for a combination of several diseases, whereas its French  
54  
55  
56 359 version has only been validated for diabetes and HIV (10). Thus, patients with several chronic  
57  
58  
59  
60

1  
2  
3  
4 360 diseases may not have the same representations regarding the treatments for each disease. The  
5  
6  
7 361 scores given by patients on each of their treatments were used to estimate the level of  
8  
9  
10 362 importance given to each medication. Notably, a predominant observation was that for the  
11  
12  
13 363 majority of patients, all their prescribed medications were perceived as equally significant,  
14  
15  
16 364 potentially indicating an absence of prioritization.

17  
18  
19  
20 365 Another limitation inherent in our study pertains to the exclusive utilization of a questionnaire  
21  
22  
23 366 to assess adherence, despite the availability of various adherence measurement methods (both  
24  
25  
26 367 direct and indirect). While the questionnaire presents a straightforward, swift, and cost-effective  
27  
28  
29 368 technique, its stand-alone use is less robust. Many authors recommend using at least two  
30  
31  
32 369 methods. In addition, the use of questionnaires tends to overestimate medication adherence (29)  
33  
34  
35 370 which may seem worrying in view of the already low adherence reported in our results. In the  
36  
37  
38 371 context of short-stay inpatients, it was not possible to use direct methods (drug measurements,  
39  
40  
41 372 biological marker measurements), or to use any other indirect method than the questionnaire.  
42  
43  
44 373 Moreover, this would have lengthened the interview time with the patients and thus made the  
45  
46  
47 374 procedure more cumbersome.

48  
49  
50  
51 375 Concerning the evaluation of knowledge, the hospitalization of our population certainly had an  
52  
53  
54 376 impact on the real knowledge of the patients about their treatment. In discussion with the  
55  
56  
57 377 doctors, we reached this limit in our study. Being in a stressful environment, in a context of  
58  
59  
60

1  
2  
3  
4 378 acute pathology, could potentially have decreased their true knowledge of the names and  
5  
6  
7 379 indications of their treatment, inducing a bias.  
8  
9

10 380 One of the exclusion criteria for the study was cognitive impairment. This was assessed  
11  
12  
13 381 clinically but was not confirmed by a specific assessment test such as Mini Mental State  
14  
15  
16 382 Examination (MMSE). This would have again made the protocol and interviews more  
17  
18  
19  
20 383 cumbersome.  
21  
22  
23  
24

## 25 384 **Conclusion**

26  
27  
28  
29  
30

31 385 The level of knowledge and medication adherence of patients with multiple chronic diseases in  
32  
33  
34 386 the vascular medicine and surgery department is low. Representations of the disease and of  
35  
36  
37 387 medication have an impact on patients' behaviour. They are determinants of adherence to  
38  
39  
40  
41 388 medication. Identifying patients' beliefs about their chronic treatment allows caregivers to adapt  
42  
43  
44 389 information to patients' needs. Better information from healthcare professionals (physician,  
45  
46  
47 390 nurse, pharmacist, etc.) regarding the indication and efficacy of the prescribed treatment is  
48  
49  
50  
51 391 essential. Combined with the consideration of patients' concerns, particularly regarding  
52  
53  
54 392 tolerance, this will improve the benefit/concern ratio perceived by these patients, and thus  
55  
56  
57 393 increase their compliance. The BMQ may help to identify patients at risk of poor compliance.  
58  
59  
60

1  
2  
3  
4 394  
5  
6  
7 395  
8  
9  
10 396  
11  
12  
13  
14  
15  
16  
17  
18  
19  
20  
21  
22  
23  
24  
25  
26  
27  
28  
29  
30  
31  
32  
33  
34  
35  
36  
37  
38  
39  
40  
41  
42  
43  
44  
45  
46  
47  
48  
49  
50  
51  
52  
53  
54  
55  
56  
57  
58  
59  
60

For peer review only

1  
2  
3  
4 397 **Acknowledgments**  
5  
6  
7

8 398 The authors would like to thank all the staff members of the vascular medicine and surgery  
9  
10 399 department for their kind help in performing this study.  
11  
12  
13

14 400  
15  
16

17  
18 401 **Contributors:**  
19  
20

21  
22 402 DK, JS, MB, SPL and JFH contributed to the study conception and design. Data collection and  
23  
24  
25 403 analysis were performed by CV and DK. The first draft of the manuscript was written by DK  
26  
27  
28 404 and JS, MB, AB, SPL, CV and JFH commented on previous versions of the manuscript. All  
29  
30  
31  
32 405 authors read and approved the final manuscript.  
33  
34

35 406  
36  
37  
38

39 407 **Competing interests**  
40  
41

42  
43 408 The Author(s) declare(s) that there is no conflict of interest.  
44  
45

46 409  
47

48 410 **Funding**  
49  
50

51  
52 411 No funding was obtained for this study.  
53  
54

55 412  
56  
57  
58  
59  
60



1  
2  
3  
4 413 **Data sharing statement**  
5  
6

7 414 The data underlying this article will be shared on reasonable request to the corresponding  
8  
9 415 author.  
10  
11  
12  
13  
14  
15  
16  
17  
18  
19  
20  
21  
22  
23  
24  
25  
26  
27  
28  
29  
30  
31  
32  
33  
34  
35  
36  
37  
38  
39  
40  
41  
42  
43  
44  
45  
46  
47  
48  
49  
50  
51  
52  
53  
54  
55  
56  
57  
58  
59  
60

For peer review only

## 416 Bibliography

- 417 1. Chassang M, Gautier A. Les maladies chroniques [online]. 2019.  
418 [https://www.lecese.fr/sites/default/files/pdf/Avis/2019/2019\\_14\\_maladies\\_chroniques.pdf](https://www.lecese.fr/sites/default/files/pdf/Avis/2019/2019_14_maladies_chroniques.pdf)  
419 (accessed 21 Januar 2022).
- 420 2. WHO. Noncommunicable diseases [online]. [https://www.who.int/fr/news-room/fact-](https://www.who.int/fr/news-room/fact-sheets/detail/noncommunicable-diseases)  
421 [sheets/detail/noncommunicable-diseases](https://www.who.int/fr/news-room/fact-sheets/detail/noncommunicable-diseases) (accessed 21 October 2023).
- 422 3. Briançon S, Guérin G, Sandrin-Berthon B. Maladie chroniques [online]. 2010. 2010-  
423 09-adsp-n°72-maladies-chroniques-et-ETP.pdf. (accessed 21 Januar 2022)
- 424 4. Laroche JP, Guilbert B, Miserey G, et al. Conseil National Professionnel de Médecine  
425 Vasculaire, Médecine Vasculaire - Etat des lieux. [online]. 2015.  
426 [https://www.portailvasculaire.fr/sites/default/files/docs/livre\\_blanc\\_2015.pdf](https://www.portailvasculaire.fr/sites/default/files/docs/livre_blanc_2015.pdf) (accessed 26  
427 July 2022)
- 428 5. Monégat M, Sermet C, Perronnin M, et al. La polymédication definitions mesures et  
429 enjeux [online]. 2014. [https://www.irdes.fr/recherche/questions-d-economie-de-la-sante/204-](https://www.irdes.fr/recherche/questions-d-economie-de-la-sante/204-la-polymedication-definitions-mesures-et-enjeux.pdf)  
430 [la-polymedication-definitions-mesures-et-enjeux.pdf](https://www.irdes.fr/recherche/questions-d-economie-de-la-sante/204-la-polymedication-definitions-mesures-et-enjeux.pdf) (accessed 3 Januar 2022)
- 431 6. Le Cossec C. La polymédication au regard de différents indicateurs de sa mesure: impact  
432 sur la prévalence, les classes thérapeutiques concernées et les facteurs associés. [online]. 2015.

- 1  
2  
3  
4 433 <https://www.irdes.fr/recherche/rapports/562-la-polymedication-au-regard-de-differents->  
5  
6  
7 434 [indicateurs-de-sa-mesure.pdf](#) (accessed 3 Januar 2022)  
8  
9  
10 435 7. Schneider MP, Herzig L, Hugentobler Hampai D, et al. *Revue Medicale Suisse*.  
11  
12  
13 436 Adhésion thérapeutique du patient chronique : des concepts à la prise en charge ambulatoire  
14  
15  
16  
17 437 [online]. 2013. <https://www.revmed.ch/revue-medicale-suisse/2013/revue-medicale-suisse->  
18  
19  
20 438 [386/adhesion-therapeutique-du-patient-chronique-des-concepts-a-la-prise-en-charge-](#)  
21  
22  
23 439 [ambulatoire](#) (accessed 3 Januar 2022)  
24  
25  
26  
27 440 8. Turrise S. Illness Representations, Treatment Beliefs, Medication Adherence, and 30-  
28  
29  
30 441 Day Hospital Readmission in Adults With Chronic Heart Failure: A Prospective Correlational  
31  
32  
33 442 Study. *J Cardiovasc Nurs*. 2016;31(3):245-54. doi: 10.1097/JCN.0000000000000249  
34  
35  
36  
37 443 9. Horne R, Weinman J, Hankins M. The beliefs about medicines questionnaire: The  
38  
39  
40 444 development and evaluation of a new method for assessing the cognitive representation of  
41  
42  
43 445 medication. *Psychol Health*. 1999;14(1):1-24. doi: 10.1080/08870449908407311  
44  
45  
46  
47 446 10. Masson E. EM-Consulte. Validation of the French version of the Beliefs about  
48  
49  
50 447 Medicines Questionnaire (BMQ) among diabetes and HIV patients [online]. 2014.  
51  
52  
53 448 <https://www.em-consulte.com/article/934270/validation-of-the-french-version-of-the-beliefs->  
54  
55  
56  
57 449 [ab](#) (accessed 3 Januar 2022)  
58  
59  
60

- 1  
2  
3  
4 450 11. Horne R, Weinman J. Patients' beliefs about prescribed medicines and their role in  
5  
6  
7 451 adherence to treatment in chronic physical illness. *J Psychosom Res.* 1999;47(6):555-67. doi:  
8  
9  
10 452 10.1016/S0022-3999(99)00057-4  
11  
12  
13 453 12. Charles C, Ninot G, Sultan S. Représentations des patients et observance des traitements  
14  
15  
16 454 par corticostéroïdes inhalés dans l'asthme. Revue systématique sur la période 1999–2009. *Rev*  
17  
18  
19  
20 455 *Mal Respir.* 2011;28(5):626-35. doi: 10.1016/j.rmr.2010.11.003  
21  
22  
23 456 13. Girerd X, Hanon O, Anagnostopoulos K, et al. Assessment of antihypertensive  
24  
25  
26 457 compliance using a self-administered questionnaire: development and use in a hypertension  
27  
28  
29  
30 458 clinic. *Presse Medicale Paris Fr* 1983. 2001;30(21):1044-8.  
31  
32  
33 459 14. Torrecillas S, Perrot E, Gérinière L, et al. Croyances des patients envers les thérapies  
34  
35  
36 460 ciblées orales et leur influence sur l'observance dans le cancer broncho-pulmonaire : une étude  
37  
38  
39  
40 461 pilote prospective. *Rev Pneumol Clin.* 2016;72(1):25-34. doi: 10.1016/j.pneumo.2015.03.005  
41  
42  
43 462 15. Déat et al. Croyances à propos des médicaments et observance chez les patients atteints  
44  
45  
46 463 de maladie chronique. *Exerc Rev Francoph Médecine Générale.* 28(138):436.  
47  
48  
49  
50 464 16. Huon JF, Lenain E, LeGuen J, et al. How Drug Use by French Elderly Patients Has  
51  
52  
53 465 Changed During the Last Decade. *Drugs - Real World Outcomes.* 2015;2(4):327-33. doi:  
54  
55  
56 466 10.1007/s40801-015-0041-6  
57  
58  
59  
60

- 1  
2  
3  
4 467 17. Bruyer B. Évaluation des connaissances que les patients ont de leurs traitements et du  
5  
6  
7 468 temps d'éducation thérapeutique en consultation de médecine générale ou en pharmacie.  
8  
9  
10 469 Médecine humaine et pathologie. 2020. ffdumas-03054136f  
11  
12 470 18. Chung MK, Bartfield JM. Knowledge of prescription medications among elderly  
13  
14  
15  
16 471 emergency department patients. *Ann Emerg Med.* 2002;39(6):605-8. doi:  
17  
18  
19 472 10.1067/mem.2002.122853  
20  
21  
22 473 19. Persell SD, Heiman HL, Weingart SN, et al. Understanding of drug indications by  
23  
24  
25  
26 474 ambulatory care patients. *Am J Health Syst Pharm.* 2004;61(23):2523-7. doi:  
27  
28  
29 475 10.1093/ajhp/61.23.2523  
30  
31  
32 476 20. Akici A, Kalaça S, Uğurlu MU, et al. Patient knowledge about drugs prescribed at  
33  
34  
35  
36 477 primary healthcare facilities. *Pharmacoepidemiol Drug Saf.* 2004;13(12):871-6. doi:  
37  
38  
39 478 10.1002/pds.1020  
40  
41  
42 479 21. Haidar-Ahmad F. Les facteurs influençant la connaissance du traitement chronique :  
43  
44  
45  
46 480 étude menée sur 351 patients dans les 14ème, 15ème et 16ème arrondissements de Marseille.  
47  
48  
49 481 Sciences du Vivant [q-bio]. 2019. ffdumas-02274110f  
50  
51  
52 482 22. Huon JF, Fronteau C, Caffin AG, et al. Évaluation des représentations relatives aux  
53  
54  
55 483 médicaments chez les patients atteints de myélome multiple. *Educ Thérapeutique Patient - Ther*  
56  
57  
58 484 *Patient Educ. EDP Sciences;* 2017;9(1):10101. doi: 10.1051/tpe/2017002  
59  
60

- 1  
2  
3  
4 485 23. Oudjhani M, Foison O, Astier A. Est-ce que les sujets âgés connaissent leurs  
5  
6  
7 486 traitements ? J Pharm Clin. 2012;31(2):113-6. doi: 10.1684/jpc.2012.0215  
8  
9  
10 487 24. Johnson MJ. The Medication Adherence Model: a guide for assessing medication taking.  
11  
12  
13 488 Research and theory for nursing practice, 16(3), 179–192. 2002.  
14  
15 489 <https://doi.org/10.1891/rtnp.16.3.179.53008>  
16  
17  
18 490 25. Fuertes JN, Mislowack A, Bennett J, et al. The physician–patient working alliance.  
19  
20  
21 491 Patient Educ Couns. 2007;66(1):29-36. doi: 10.1016/j.pec.2006.09.013  
22  
23  
24  
25 492 26. Monnier G, Charpiat B, Serratrice F, et al. Evaluation de l’apport d’une consultation de  
26  
27  
28 493 pharmacie sur les connaissances des patients transplantés hépatiques. Therapies.  
29  
30  
31 494 2003;58(4):305-11. doi: 10.2515/therapie:2003047  
32  
33  
34  
35 495 27. Peh, K.Q.E., Kwan, et al. An Adaptable Framework for Factors Contributing to  
36  
37  
38 496 Medication Adherence: Results from a Systematic Review of 102 Conceptual Frameworks. J  
39  
40  
41 497 GEN INTERN MED 36,  
42  
43  
44  
45 498 28. Kelly M, McCarthy S, Sahm LJ. Knowledge, attitudes and beliefs of patients and carers  
46  
47  
48 499 regarding medication adherence: a review of qualitative literature. Eur J Clin Pharmacol.  
49  
50  
51 500 2014;70(12):1423-31. doi: 10.1007/s00228-014-1761-3  
52  
53  
54  
55  
56  
57  
58  
59  
60

1  
2  
3  
4 501 29. Allenet B, Baudrant M, Lehmann A, et al. Comment évaluer l'adhésion  
5  
6  
7 502 médicamenteuse? Le point sur les méthodes. Ann Pharm Fr. 2013;71(2):135-41. doi:  
8  
9  
10 503 10.1016/j.pharma.2012.10.001  
11  
12

13  
14 504  
15  
16  
17  
18  
19  
20  
21  
22  
23  
24  
25  
26  
27  
28  
29  
30  
31  
32  
33  
34  
35  
36  
37  
38  
39  
40  
41  
42  
43  
44  
45  
46  
47  
48  
49  
50  
51  
52  
53  
54  
55  
56  
57  
58  
59  
60

For peer review only

1  
2  
3  
4  
5  
6  
7  
8  
9  
10  
11  
12  
13  
14  
15  
16  
17  
18  
19  
20  
21  
22  
23  
24  
25  
26  
27  
28  
29  
30  
31  
32  
33  
34  
35  
36  
37  
38  
39  
40  
41  
42  
43  
44  
45  
46  
47  
48  
49  
50  
51  
52  
53  
54  
55  
56  
57  
58  
59  
60

505 **Legends**

506 **Figure 1:** Responses to the BMQ questionnaire (percentage of responses among the 100  
507 patients)

For peer review only



508 **Tables**509 **Table 1. BMQ score results - Beliefs**

| BMQ* - Beliefs                   | N = 100             | Male<br>N = 69 | Female<br>N = 31 | p-value       |
|----------------------------------|---------------------|----------------|------------------|---------------|
| Specific Beliefs - Necessity     | 21.9±3.5 [8.0;25.0] | 21.7±3.6       | 22.2±3.1         | 0,4822        |
| Specific Beliefs - Concerns      | 11.1±4.8 [5.0;23.0] | 10.5±4.4       | 12.5±5.5         | 0.0509        |
| General Beliefs - Harm           | 9.1±3.2 [4.0;17.0]  | 8.6±3.0        | 10.1±3.5         | <b>0.0352</b> |
| General Beliefs - Overuse        | 10.3±3.4 [4.0;17.0] | 9.8±3.4        | 11.5±3.3         | <b>0.0170</b> |
| BMQ Necessity - BMQ Concern > 0† | 96 (96.0%)          | 66 (95.7%)     | 30 (96.0%)       | 1.0000        |

510 Results are presented as mean ± standard deviation [minimum-maximum] or frequencies and percentages

511 Specific belief scores range from 5 to 25 and general belief scores range from 4 to 20. A high score indicates a  
512 strong belief.

513 \*BMQ: Belief Medical Questionnaire

514 †BMQ "necessity" - BMQ "concern" > 0 means that the beneficial character is superior to the worrying character.

515 **Table 2. Responses to the GIRERD questionnaire and correlations between compliance and**  
 516 **beliefs (N=100)**

| Questions and number of positive responses                                                                                |                 |                  |                  | N (%)         |
|---------------------------------------------------------------------------------------------------------------------------|-----------------|------------------|------------------|---------------|
| Did you forget to take your medication this morning?                                                                      |                 |                  |                  | 1 (1.0%)      |
| Since your last visit, have you run out of medication?                                                                    |                 |                  |                  | 7 (7.0%)      |
| Have you ever taken your medication late compared to the usual time?                                                      |                 |                  |                  | 43 (43.0%)    |
| Have you ever not taken your medication because your memory fails you some days?                                          |                 |                  |                  | 23 (23.0%)    |
| Have you ever not taken your medication because some days you feel that your medication is doing you more harm than good? |                 |                  |                  | 9 (9.0%)      |
| Do you think you have too many pills to take?                                                                             |                 |                  |                  | 61 (61.0%)    |
|                                                                                                                           | Good adherent   | Low adherent     | Non-adherent     | p-value       |
|                                                                                                                           | N = 11 (11.0%)  | N = 79 (79.0%)   | N = 10 (10.0%)   |               |
| Specific Beliefs - Necessity                                                                                              | 21.0 [6.0;12]   | 23.0 [21.0;25.0] | 23.0 [16.0;24.0] | 0.6487        |
| Specific Beliefs - Concerns                                                                                               | 9.0 [6.0;12.0]  | 11.0 [6.0;14.0]  | 17.0 [9.0;20.0]  | 0.1163        |
| BMQ Necessity - BMQ Concern > 0†                                                                                          | 11 (100.0%)     | 78 (98.7%)       | 7 (70.0%)        | <b>0.0039</b> |
| General Beliefs - Harm                                                                                                    | 9.0 [6.0;12.0]  | 8.0 [6.0 ;11.0]  | 11.5[9.0 ;16.0]  | 0.0739        |
| General Beliefs - Overconsumption                                                                                         | 8.0 [5.0 ;12.0] | 10.0 [8.0 ;13.0] | 13.0 [9.0 ;16.0] | 0.1086        |

517 The results are presented in median [1st Quartile; 3rd Quartile] for quantitative variables and in the form of  
 518 frequencies (%) for qualitative variables

519 Specific belief scores range from 5 to 25 and general belief scores range from 4 to 20. A high score indicates a  
 520 strong belief.

521 †BMQ "necessity" - BMQ "concern" > 0 means that the beneficial character is superior to the worrying character.

522 BMQ: Belief Medical Questionnaire

523 **Table 3.** Correlation between adherence, beliefs and knowledge about their treatments for the  
 524 100 patients

525

|                         | Beliefs                      | Drugs mentioned |               | Known indications |               |
|-------------------------|------------------------------|-----------------|---------------|-------------------|---------------|
|                         |                              | r               | p             | r                 | p             |
| Good adherent<br>(N=11) | Specific Beliefs - Necessity | -0.22           | 0.5220        | 0.17              | 0.6185        |
|                         | Specific Beliefs - Concerns  | -0.01           | 0.9837        | -0.11             | 0.7403        |
|                         | General Beliefs - Harm       | 0.07            | 0.8488        | 0.15              | 0.6686        |
|                         | General Beliefs - Overuse    | 0.37            | 0.2651        | 0.26              | 0.442         |
| Low adherent<br>(N=79)  | Specific Beliefs - Necessity | 0.01            | 0.9540        | -0.07             | 0.5457        |
|                         | Specific Beliefs - Concerns  | -0.12           | 0.2994        | -0.11             | 0.3491        |
|                         | General Beliefs - Harm       | -0.21           | 0.0689        | -0.30             | <b>0.0069</b> |
|                         | General Beliefs - Overuse    | -0.23           | <b>0.0401</b> | -0.21             | 0.0630        |
| Non-adherent<br>(N=10)  | Specific Beliefs - Necessity | -0.35           | 0.3216        | -0.43             | 0.2149        |
|                         | Specific Beliefs - Concerns  | 0.41            | 0.2434        | 0.44              | 0.2064        |
|                         | General Beliefs - Harm       | 0.21            | 0.5643        | 0.57              | 0.0858        |
|                         | General Beliefs - Overuse    | 0.38            | 0.2726        | 0.47              | 0.1677        |

526

**Figure 1:** Responses to the BMQ questionnaire (percentage of responses among the 100 patients)

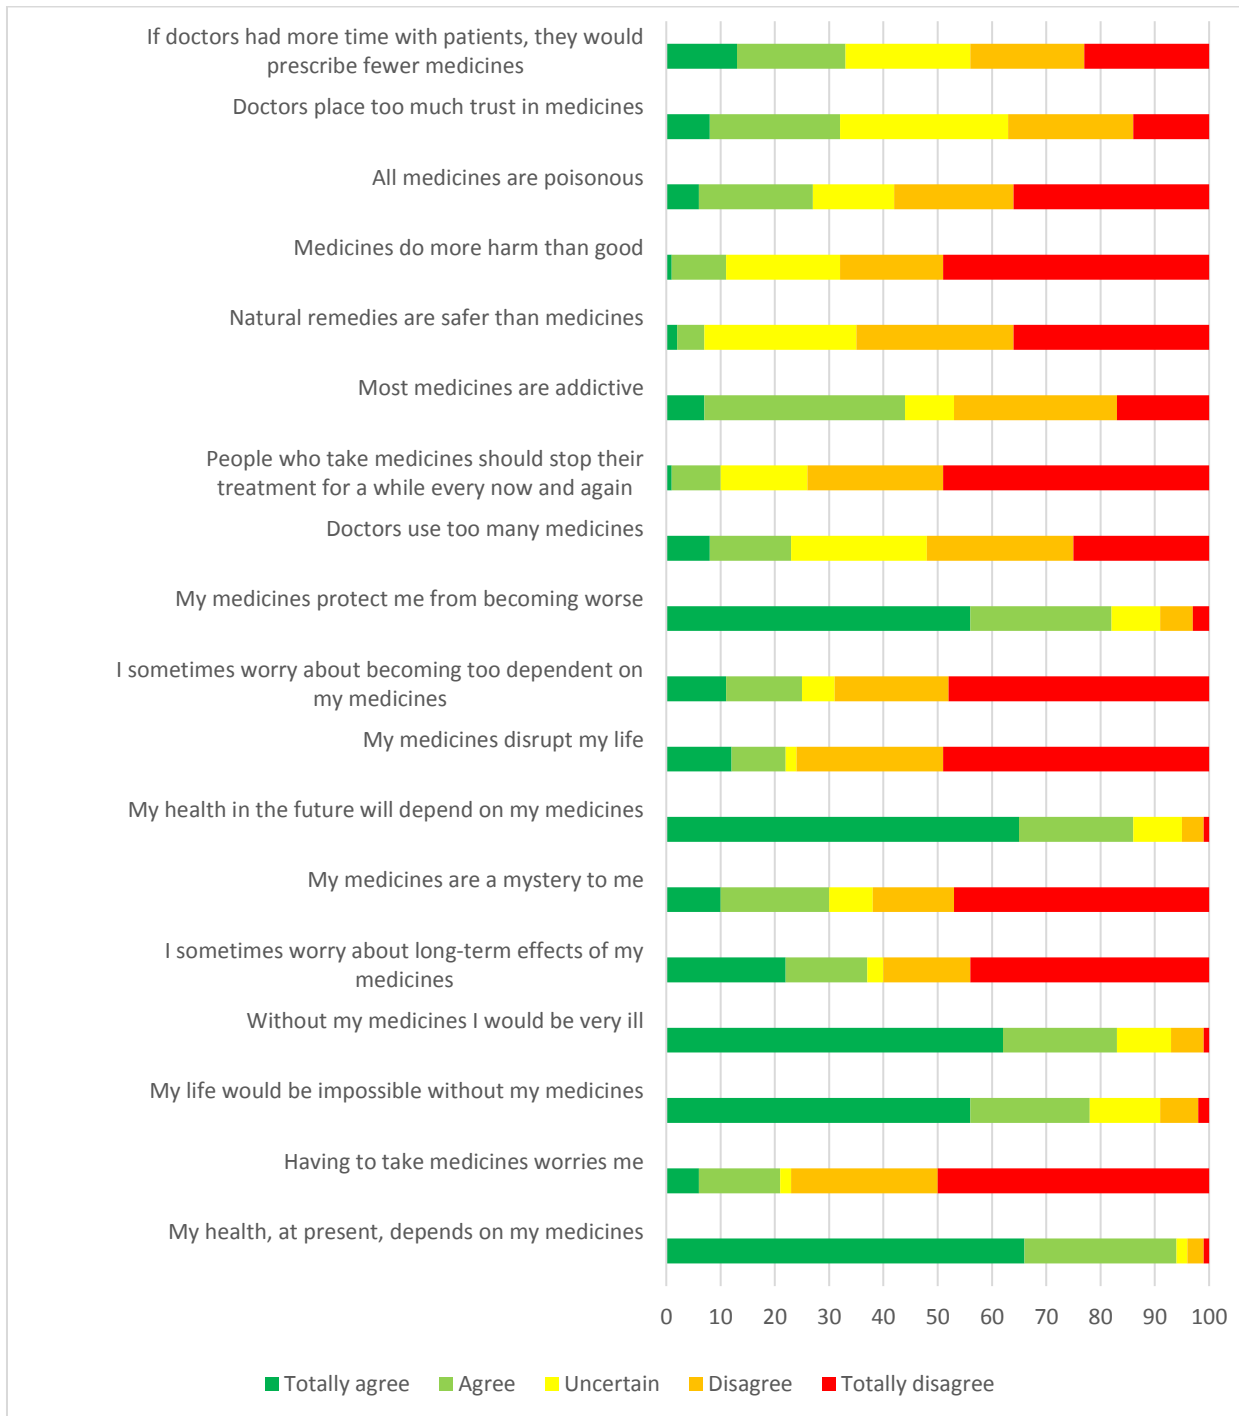

## Supplemental Table :

**Supplemental Table 1.** Characteristics of the population (N=100) and the drugs (N=965)

| Characteristics of patients                                         | N=100                   |
|---------------------------------------------------------------------|-------------------------|
| Female sex                                                          | 31 (31.0%)              |
| Age (years)                                                         | 70.8 ± 10.7 [38.0;92.0] |
| Time since first chronic treatment (years)                          | 19.4 ± 12.4 [0.5;58.0]  |
| Level of study                                                      |                         |
| Secondary level                                                     | 45 (45.0%)              |
| Higher study                                                        | 24 (24.0%)              |
| Primary level                                                       | 24 (24.0%)              |
| Lack of study                                                       | 7 (7.0%)                |
| Socio-professional category                                         |                         |
| Workers                                                             | 31 (31.0%)              |
| Intermediate professions                                            | 18 (18.0%)              |
| Employees                                                           | 17 (17.0%)              |
| Executives, Higher intellectual professions                         | 14 (14.0%)              |
| Craftsmen, Shopkeeper, Compagny managers                            | 12 (12.0%)              |
| Farmer                                                              | 5 (5.0%)                |
| Other†                                                              | 3 (3.0%)                |
| Lifestyle                                                           |                         |
| Circled                                                             | 91 (91.0%)              |
| Alone                                                               | 9 (9.0%)                |
| Organization around medication intake                               |                         |
| Autonomous                                                          | 83 (83.0%)              |
| Help from relatives (partner, children)                             | 11 (11.0%)              |
| Assistance from a nurse                                             | 6 (6.0%)                |
| Information received at the start of treatment                      | 87 (87.0%)              |
| Source of information                                               |                         |
| From the general practitioner                                       | 73 (73.0%)              |
| From the specialist doctor                                          | 61 (61.0%)              |
| From the pharmacist                                                 | 46 (46.0%)              |
| From family and friends                                             | 5 (5.0%)                |
| Information received perceived as sufficient by the patient         | 64 (64.0%)              |
| Need for additional research (Internet, books, magazines, leaflets) | 27 (27.0%)              |

| <b>Drug Characteristics</b>                   | <b>N=965</b>     |
|-----------------------------------------------|------------------|
| Number of drugs per patient                   | 9.7 ± 3.6 [5;21] |
| ATC class of drugs                            |                  |
| Cardiovascular (C)                            | 310 (32.0%)      |
| Alimentary tract and metabolism (A)           | 190 (19.8%)      |
| Nervous System (N)                            | 175 (18.0%)      |
| Blood and blood-forming organs (B)            | 141 (14.6%)      |
| Respiratory system(R)                         | 47 (4.9%)        |
| Systemic hormones, excluding sex hormones (H) | 19 (2.0%)        |
| Other‡                                        | 83 (8.7%)        |

Results are presented as mean ± standard deviation [minimum-maximum] for quantitative variables and as counts (%) for qualitative variables

\*To the question "Since when have you been taking your first chronic treatment?", 4 patients were unable to answer.

†Other occupations: Housewife (2%), No occupation (1%)

‡Other ATC class: J-General anti-infectives for systemic use (0.8%), L-Antineoplastics and immunomodulators (1.6%), P-Antiparasitic, insecticides (0.1%), V-Miscellaneous (0.6%), D-Dermatological drugs (0.5%), M-Muscle and skeletal (1.4%), S-Sensory organs (1%), G-Genitourinary system and sex hormones (1.7%), No ATC class (1%)

**Supplemental Table 2.** Correlation between different age categories and patients' knowledge (drugs and indications cited) (N = 100)

|                                 | Age (years) | [30-59]<br>N=10 | [60-69]<br>N=28 | [70-79]<br>N=46 | [80 and more]<br>N=16 | p-value       |
|---------------------------------|-------------|-----------------|-----------------|-----------------|-----------------------|---------------|
| Percentage of drugs cited       | Median      | 83.3            | 46.4            | 40.0            | 28.6                  | <b>0.0193</b> |
|                                 | [Q1;Q3]     | [66.7;100.0]    | [29.7;74.3]     | [18.2;71.4]     | [0.0;66.4]            |               |
|                                 | [Min-Max]   | [20.0 ;100.0]   | [0.0;100.0]     | [0.0;100.0]     | [0.0;100.0]           |               |
| Percentage of known indications | Median      | 100.0           | 75              | 80.9            | 84.5                  | 0.0761        |
|                                 | [Q1;Q3]     | [82.4;100.0]    | [55.2;90.5]     | [54.5;100.0]    | [39.4;100.0]          |               |
|                                 | [Min-Max]   | [60.0;100.0]    | [23.1;100.0]    | [0.0;100.0]     | [0.0;100.0]           |               |

Q1 : First Quartile ; Q3 : Third quartile ; Min : minimum ; Max : maximum

## Supplemental Files 1 : Global questionnaire

Patient n°: .....

Length of the interview: .....

### **Socio-demographic information :**

Gender:                      Age:                      Lifestyle:     Married     Single     Children

Origins:

Level of study:

Socio-professional category:     Farmer                       Craftsmen, Shopkeeper, Compagny managers

Executives, Higher intellectual professions                       Professions intermédiaires

Employees     Workers                      Other:.....

### **Chronic treatment :**

Number of medications on the prescription:

How long have you been taking your first chronic treatment?

### **Informations :**

- Have you ever had your treatments explained to you?    Yes     No
- Do you feel you have received enough information about your treatments?    Yes     No
- From whom did you get information about your treatments?
  - Specialist
  - General practitioner
  - Pharmacist
  - Family

### **Treatment management :**

- Who manages your treatments?
  - Myself
  - A nurse
  - A family member





## Supplemental Files 2 : Belief Medical Questionnaire

**Patient n°:**

Score:

1: Totally disagree, 2: Disagree, 3: Uncertain, 4: Agree, 5: Totally agree

### Specific Beliefs :

1. My health, at present, depends on my medicines:
2. Having to take medicines worries me:
3. My life would be impossible without my medicines:
4. Without my medicines I would be very ill:
5. I sometimes worry about long-term effects of my medicines:
6. My medicines are a mystery to me:
7. My health in the future will depend on my medicines:
8. My medicines disrupt my life:
9. I sometimes worry about becoming too dependent on my medicines:
10. My medicines protect me from becoming worse:

### General Beliefs :

11. Doctors use too many medicines:
12. People who take medicines should stop their treatment for a while every now and again:
13. Most medicines are addictive:
14. Natural remedies are safer than medicines:
15. Medicines do more harm than good:
16. All medicines are poisonous:
17. Doctors place too much trust in medicines:
18. If doctors had more time with patients, they would prescribe fewer medicines:

## Supplemental Files 3 : GIRERD questionnaire

### Assessment of medication compliance

Patient n° :

|                                                                                                                           | YES | NO |
|---------------------------------------------------------------------------------------------------------------------------|-----|----|
| Did you forget to take your medication this morning?                                                                      |     |    |
| Since your last visit, have you run out of medication?                                                                    |     |    |
| Have you ever been late taking your medication?                                                                           |     |    |
| Have you ever not taken your medication because your memory fails you some days?                                          |     |    |
| Have you ever not taken your medication, because some days you feel that your treatment is doing you more harm than good? |     |    |
| Do you think you have too many pills to take?                                                                             |     |    |

## Supplemental Files 4 : The local ethics committee

AVIS 22-06-2201

Groupe Nantais d'Éthique dans le Domaine de la Santé (GNEDS)

|                                        |                                                                                                            |
|----------------------------------------|------------------------------------------------------------------------------------------------------------|
| Nom du protocole<br>Code et versioning | <b>Croyances et représentations chez les patients<br/>polymédiqués en chirurgie et médecine vasculaire</b> |
|----------------------------------------|------------------------------------------------------------------------------------------------------------|

|                                        |                                                                                                          |
|----------------------------------------|----------------------------------------------------------------------------------------------------------|
| Investigateur principal                | Dr JF HUON                                                                                               |
| Lieu de l'étude                        | CHU NANTES                                                                                               |
| Type de l'étude                        | Monocentrique, prospective, exploratoire, observationnelle                                               |
| Type patients/participants             | Patients polymédiqués hospitalisés en chirurgie et médecine vasculaire                                   |
| Nombre de patients/participants prévus | 100                                                                                                      |
| Objectif principal                     | Évaluation de la croyance des patients sur leurs traitements habituels                                   |
| Objectif secondaire                    | Connaissance et importance données par le patient à chacun de ses traitements<br>Adhésion médicamenteuse |

### Documents communiqués

|                                                |     |
|------------------------------------------------|-----|
| Justification de l'étude                       | OUI |
| Méthodologie                                   | OUI |
| Lettre d'information et lettre de consentement | OUI |

### Remarque générale

Le GNEDS formule d'abord la remarque qu'il n'a pas pour mission de donner un avis sur les aspects scientifiques du protocole, en particulier sur l'adéquation de la méthodologie aux objectifs poursuivis par l'étude. Il ne tient compte des données d'ordre scientifique et méthodologique que dans la mesure où elles ont des implications d'ordre éthique. Dans le cas présent, il se bornera à constater que les objectifs de cette étude et sa méthodologie sont conformes aux principes de l'éthique.

### Confidentialité

|                 |      |
|-----------------|------|
| Confidentialité | OUI  |
| Anonymat        | OUI  |
| CNIL            | RGPD |

Commentaires :

**Information et consentement***Consentement :*

|                              |      |
|------------------------------|------|
| Recueil nécessaire           | OUI  |
| Type consentement préférable | ORAL |
| Traçabilité dans le dossier  | NA   |

Commentaires :

*Lettre information précisant :*

|                                              |     |
|----------------------------------------------|-----|
| Titre de l'étude                             | OUI |
| But de l'étude                               | OUI |
| Déroulement de l'étude                       | OUI |
| Prise en charge courante inchangée           | OUI |
| Possibilité de recevoir résultats de l'étude | OUI |
| Traçabilité dans le dossier                  | NA  |

Commentaires :

**Conclusion**

|                                        |     |
|----------------------------------------|-----|
| Avis favorable                         | OUI |
| Révision nécessaire selon commentaires |     |
| Avis défavorable                       |     |

**GNEDS : Professeur Paul BARRIERE**

Nantes le 22 juin 2022



# Reporting checklist for cross sectional study.

**An observational and prospective study: Evaluation of beliefs and representations of chronic treatments of polymedicated patients hospitalized in a vascular medicine and surgery department**

D. Kotry *et al.*

Based on the STROBE cross sectional guidelines.

## Instructions to authors

Complete this checklist by entering the page numbers from your manuscript where readers will find each of the items listed below.

Your article may not currently address all the items on the checklist. Please modify your text to include the missing information. If you are certain that an item does not apply, please write "n/a" and provide a short explanation.

Upload your completed checklist as an extra file when you submit to a journal.

In your methods section, say that you used the STROBE cross sectional reporting guidelines, and cite them as:

von Elm E, Altman DG, Egger M, Pocock SJ, Gotsche PC, Vandenbroucke JP. The Strengthening the Reporting of Observational Studies in Epidemiology (STROBE) Statement: guidelines for reporting observational studies.

Reporting Item

Page Number

|    |                           |                                                         |     |
|----|---------------------------|---------------------------------------------------------|-----|
| 1  | <b>Title and abstract</b> |                                                         |     |
| 2  |                           |                                                         |     |
| 3  |                           |                                                         |     |
| 4  | Title                     | <a href="#">#1a</a>                                     | 1   |
| 5  |                           | Indicate the study's design with a commonly used term   |     |
| 6  |                           | in the title or the abstract                            |     |
| 7  |                           |                                                         |     |
| 8  |                           |                                                         |     |
| 9  |                           |                                                         |     |
| 10 | Abstract                  | <a href="#">#1b</a>                                     | 2-3 |
| 11 |                           | Provide in the abstract an informative and balanced     |     |
| 12 |                           | summary of what was done and what was found             |     |
| 13 |                           |                                                         |     |
| 14 |                           |                                                         |     |
| 15 | <b>Introduction</b>       |                                                         |     |
| 16 |                           |                                                         |     |
| 17 |                           |                                                         |     |
| 18 | Background /              | <a href="#">#2</a>                                      | 4   |
| 19 |                           | Explain the scientific background and rationale for the |     |
| 20 | rationale                 | investigation being reported                            |     |
| 21 |                           |                                                         |     |
| 22 |                           |                                                         |     |
| 23 | Objectives                | <a href="#">#3</a>                                      | 5   |
| 24 |                           | State specific objectives, including any prespecified   |     |
| 25 |                           | hypotheses                                              |     |
| 26 |                           |                                                         |     |
| 27 |                           |                                                         |     |
| 28 |                           |                                                         |     |
| 29 | <b>Methods</b>            |                                                         |     |
| 30 |                           |                                                         |     |
| 31 |                           |                                                         |     |
| 32 | Study design              | <a href="#">#4</a>                                      | 5   |
| 33 |                           | Present key elements of study design early in the paper |     |
| 34 |                           |                                                         |     |
| 35 | Setting                   | <a href="#">#5</a>                                      | 5   |
| 36 |                           | Describe the setting, locations, and relevant dates,    |     |
| 37 |                           | including periods of recruitment, exposure, follow-up,  |     |
| 38 |                           | and data collection                                     |     |
| 39 |                           |                                                         |     |
| 40 |                           |                                                         |     |
| 41 |                           |                                                         |     |
| 42 | Eligibility criteria      | <a href="#">#6a</a>                                     | 5   |
| 43 |                           | Give the eligibility criteria, and the sources and      |     |
| 44 |                           | methods of selection of participants.                   |     |
| 45 |                           |                                                         |     |
| 46 |                           |                                                         |     |
| 47 |                           |                                                         |     |
| 48 |                           | <a href="#">#7</a>                                      | 5-6 |
| 49 |                           | Clearly define all outcomes, exposures, predictors,     |     |
| 50 |                           | potential confounders, and effect modifiers. Give       |     |
| 51 |                           | diagnostic criteria, if applicable                      |     |
| 52 |                           |                                                         |     |
| 53 |                           |                                                         |     |
| 54 |                           |                                                         |     |
| 55 |                           |                                                         |     |
| 56 | Data sources /            | <a href="#">#8</a>                                      | 5-6 |
| 57 |                           | For each variable of interest give sources of data and  |     |
| 58 | measurement               | details of methods of assessment (measurement).         |     |
| 59 |                           |                                                         |     |
| 60 |                           |                                                         |     |

|    |                |                      |                                                            |    |
|----|----------------|----------------------|------------------------------------------------------------|----|
| 1  |                |                      | Describe comparability of assessment methods if there      |    |
| 2  |                |                      | is more than one group. Give information separately for    |    |
| 3  |                |                      | for exposed and unexposed groups if applicable.            |    |
| 4  |                |                      |                                                            |    |
| 5  |                |                      |                                                            |    |
| 6  |                |                      |                                                            |    |
| 7  |                |                      |                                                            |    |
| 8  | Bias           | <a href="#">#9</a>   | Describe any efforts to address potential sources of       | NA |
| 9  |                |                      | bias                                                       |    |
| 10 |                |                      |                                                            |    |
| 11 |                |                      |                                                            |    |
| 12 |                |                      |                                                            |    |
| 13 | Study size     | <a href="#">#10</a>  | Explain how the study size was arrived at                  | 5  |
| 14 |                |                      |                                                            |    |
| 15 |                |                      |                                                            |    |
| 16 | Quantitative   | <a href="#">#11</a>  | Explain how quantitative variables were handled in the     | 6  |
| 17 | variables      |                      | analyses. If applicable, describe which groupings were     |    |
| 18 |                |                      | chosen, and why                                            |    |
| 19 |                |                      |                                                            |    |
| 20 |                |                      |                                                            |    |
| 21 |                |                      |                                                            |    |
| 22 |                |                      |                                                            |    |
| 23 |                |                      |                                                            |    |
| 24 | Statistical    | <a href="#">#12a</a> | Describe all statistical methods, including those used to  | 6  |
| 25 | methods        |                      | control for confounding                                    |    |
| 26 |                |                      |                                                            |    |
| 27 |                |                      |                                                            |    |
| 28 |                |                      |                                                            |    |
| 29 | Statistical    | <a href="#">#12b</a> | Describe any methods used to examine subgroups and         | NA |
| 30 | methods        |                      | interactions                                               |    |
| 31 |                |                      |                                                            |    |
| 32 |                |                      |                                                            |    |
| 33 |                |                      |                                                            |    |
| 34 |                |                      |                                                            |    |
| 35 | Statistical    | <a href="#">#12c</a> | Explain how missing data were addressed                    | NA |
| 36 | methods        |                      |                                                            |    |
| 37 |                |                      |                                                            |    |
| 38 |                |                      |                                                            |    |
| 39 |                |                      |                                                            |    |
| 40 | Statistical    | <a href="#">#12d</a> | If applicable, describe analytical methods taking          | NA |
| 41 | methods        |                      | account of sampling strategy                               |    |
| 42 |                |                      |                                                            |    |
| 43 |                |                      |                                                            |    |
| 44 |                |                      |                                                            |    |
| 45 | Statistical    | <a href="#">#12e</a> | Describe any sensitivity analyses                          | NA |
| 46 | methods        |                      |                                                            |    |
| 47 |                |                      |                                                            |    |
| 48 |                |                      |                                                            |    |
| 49 |                |                      |                                                            |    |
| 50 |                |                      |                                                            |    |
| 51 | <b>Results</b> |                      |                                                            |    |
| 52 |                |                      |                                                            |    |
| 53 |                |                      |                                                            |    |
| 54 | Participants   | <a href="#">#13a</a> | Report numbers of individuals at each stage of study—      | 7  |
| 55 |                |                      | eg numbers potentially eligible, examined for eligibility, |    |
| 56 |                |                      |                                                            |    |
| 57 |                |                      |                                                            |    |
| 58 |                |                      |                                                            |    |
| 59 |                |                      |                                                            |    |
| 60 |                |                      |                                                            |    |



confirmed eligible, included in the study, completing follow-up, and analysed. Give information separately for for exposed and unexposed groups if applicable.

|                  |                      |                                                                                                                                                                                                                   |                      |
|------------------|----------------------|-------------------------------------------------------------------------------------------------------------------------------------------------------------------------------------------------------------------|----------------------|
| Participants     | <a href="#">#13b</a> | Give reasons for non-participation at each stage                                                                                                                                                                  | NA                   |
| Participants     | <a href="#">#13c</a> | Consider use of a flow diagram                                                                                                                                                                                    | NA                   |
| Descriptive data | <a href="#">#14a</a> | Give characteristics of study participants (eg demographic, clinical, social) and information on exposures and potential confounders. Give information separately for exposed and unexposed groups if applicable. | 7                    |
| Descriptive data | <a href="#">#14b</a> | Indicate number of participants with missing data for each variable of interest                                                                                                                                   | Supplemental Table 1 |
| Outcome data     | <a href="#">#15</a>  | Report numbers of outcome events or summary measures. Give information separately for exposed and unexposed groups if applicable.                                                                                 | 7-10 + tables        |
| Main results     | <a href="#">#16a</a> | Give unadjusted estimates and, if applicable, confounder-adjusted estimates and their precision (eg, 95% confidence interval). Make clear which confounders were adjusted for and why they were included          | 7-10 + tables        |
| Main results     | <a href="#">#16b</a> | Report category boundaries when continuous variables were categorized                                                                                                                                             | NA                   |

|    |                          |                      |                                                              |       |
|----|--------------------------|----------------------|--------------------------------------------------------------|-------|
| 1  | Main results             | <a href="#">#16c</a> | If relevant, consider translating estimates of relative risk | NA    |
| 2  |                          |                      |                                                              |       |
| 3  |                          |                      | into absolute risk for a meaningful time period              |       |
| 4  |                          |                      |                                                              |       |
| 5  |                          |                      |                                                              |       |
| 6  | Other analyses           | <a href="#">#17</a>  | Report other analyses done—e.g., analyses of                 | NA    |
| 7  |                          |                      | subgroups and interactions, and sensitivity analyses         |       |
| 8  |                          |                      |                                                              |       |
| 9  |                          |                      |                                                              |       |
| 10 |                          |                      |                                                              |       |
| 11 |                          |                      |                                                              |       |
| 12 | <b>Discussion</b>        |                      |                                                              |       |
| 13 |                          |                      |                                                              |       |
| 14 |                          |                      |                                                              |       |
| 15 | Key results              | <a href="#">#18</a>  | Summarise key results with reference to study                | 10    |
| 16 |                          |                      | objectives                                                   |       |
| 17 |                          |                      |                                                              |       |
| 18 |                          |                      |                                                              |       |
| 19 |                          |                      |                                                              |       |
| 20 | Limitations              | <a href="#">#19</a>  | Discuss limitations of the study, taking into account        | 15    |
| 21 |                          |                      | sources of potential bias or imprecision. Discuss both       |       |
| 22 |                          |                      | direction and magnitude of any potential bias.               |       |
| 23 |                          |                      |                                                              |       |
| 24 |                          |                      |                                                              |       |
| 25 |                          |                      |                                                              |       |
| 26 |                          |                      |                                                              |       |
| 27 |                          |                      |                                                              |       |
| 28 | Interpretation           | <a href="#">#20</a>  | Give a cautious overall interpretation considering           | 10-16 |
| 29 |                          |                      | objectives, limitations, multiplicity of analyses, results   |       |
| 30 |                          |                      | from similar studies, and other relevant evidence.           |       |
| 31 |                          |                      |                                                              |       |
| 32 |                          |                      |                                                              |       |
| 33 |                          |                      |                                                              |       |
| 34 |                          |                      |                                                              |       |
| 35 | Generalisability         | <a href="#">#21</a>  | Discuss the generalisability (external validity) of the      | 14    |
| 36 |                          |                      | study results                                                |       |
| 37 |                          |                      |                                                              |       |
| 38 |                          |                      |                                                              |       |
| 39 |                          |                      |                                                              |       |
| 40 |                          |                      |                                                              |       |
| 41 | <b>Other Information</b> |                      |                                                              |       |
| 42 |                          |                      |                                                              |       |
| 43 |                          |                      |                                                              |       |
| 44 | Funding                  | <a href="#">#22</a>  | Give the source of funding and the role of the funders       | 17    |
| 45 |                          |                      | for the present study and, if applicable, for the original   |       |
| 46 |                          |                      | study on which the present article is based                  |       |
| 47 |                          |                      |                                                              |       |
| 48 |                          |                      |                                                              |       |
| 49 |                          |                      |                                                              |       |
| 50 |                          |                      |                                                              |       |
| 51 |                          |                      |                                                              |       |

The STROBE checklist is distributed under the terms of the Creative Commons Attribution License CC-BY. This checklist was completed on 30. November 2022 using <https://www.goodreports.org/>, a tool made by the [EQUATOR Network](#) in collaboration with [Penelope.ai](#)
